# Supplementary material for: Pesticides With Potential Thyroid Hormone-Disrupting Effects: A Review of Recent Data
Source: Front Endocrinol (Lausanne). 2019 Dec 9;10:743. doi: 10.3389/fendo.2019.00743 (PMC6915086; doi:10.3389/fendo.2019.00743)
Supplement: Table S1 — All articles (223) classified by pesticide class with justification for selection or omission. [file Table_1.xlsx]

## Sheet: Organochlorines
ORGANOCHLORINES
EPI
PMID	Article Title	All Authors (Last, Initials)	Year	Usefull (Y/N)	Reason	Departament	Class	Experimental	Journal
25747818	Perinatal exposure to chlordecone, thyroid hormone status and neurodevelopment in infants: the Timoun cohort study in Guadeloupe (French West Indies).	Cordier, S; Bouquet, E; Warembourg, C; Massart, C; Rouget, F; Kadhel, P; Bataille, H; Monfort, C; Boucher, O; Muckle, G; Multigner, L	2015	Y	chlordecone	Inserm, U1085-IRSET, F-35000 Rennes, France; University of Rennes I, F-35000 Rennes, France. Electronic address: sylvaine.cordier@inserm.fr.	Organochlorines	epi	Environmental research
27540871	Pesticide exposure and thyroid function in an agricultural population in Brazil.	Piccoli, C; Cremonese, C; Koifman, RJ; Koifman, S; Freire, C	2016	Y	Human	National School of Public Health, Oswaldo Cruz Foundation, CEP: 21041-210 Rio de Janeiro, Brazil. Electronic address: cami.piccolli@gmail.com.	Organochlorines	epi	Environmental research
27344267	Association between organochlorine pesticide exposure and thyroid hormones in floriculture workers.	Blanco-Muñoz, J; Lacasaña, M; López-Flores, I; Rodríguez-Barranco, M; González-Alzaga, B; Bassol, S; Cebrian, ME; López-Carrillo, L; Aguilar-Garduño, C	2016	Y	Human	Instituto Nacional de Salud Pública (National Institute of Public Health), Cuernavaca, Mexico.	Organochlorines	epi	Environmental research
28787707	Association of in utero exposure to organochlorine pesticides with thyroid hormone levels in cord blood of newborns.	Luo, D; Pu, Y; Tian, H; Wu, W; Sun, X; Zhou, T; Tao, Y; Yuan, J; Shen, X; Feng, Y; Mei, S	2017	Y	OCP - Preganancy	Key Laboratory of Environment and Health, Ministry of Education & Ministry of Environmental Protection, and State Key Laboratory of Environment Health (Incubation), School of Public Health, Tongji Medical College, Huazhong University of Science and Technology, #13 Hangkong Road, Wuhan, Hubei, 430030, China.	Organochlorines	epi	Environmental pollution (Barking, Essex : 1987)
29128804	Hexachlorobenzene as a persistent organic pollutant: Toxicity and molecular mechanism of action.	Starek-Świechowicz, B; Budziszewska, B; Starek, A	2017	Y	HCB	Department of Biochemical Toxicology, Chair of Toxicology, Medical College, Jagiellonian University, Kraków, Poland. Electronic address: mfstarek@cyf-kr.edu.pl.	Organochlorines	epi	Pharmacological reports : PR
25965908	Association between Several Persistent Organic Pollutants and Thyroid Hormone Levels in Cord Blood Serum and Bloodspot of the Newborn Infants of Korea.	Kim, S; Park, J; Kim, HJ; Lee, JJ; Choi, G; Choi, S; Kim, S; Kim, SY; Moon, HB; Kim, S; Choi, K	2015	Y	POPs - Pregancy	School of Public Health, Seoul National University, Seoul, Republic of Korea.	Organochlorines	epi	PloS one
30059991	Association of In Utero Persistent Organic Pollutant Exposure With Placental Thyroid Hormones.	Li, ZM; Hernandez-Moreno, D; Main, KM; Skakkebæk, NE; Kiviranta, H; Toppari, J; Feldt-Rasmussen, U; Shen, H; Schramm, KW; De Angelis, M	2018	Y	POPs	Helmholtz Zentrum München-German Research Center for Environmental Health, Molecular EXposomics, Neuherberg, Germany.	Organochlorines	epi	Endocrinology
30256155	Pesticide Use and Incident Hypothyroidism in Pesticide Applicators in the Agricultural Health Study.	Shrestha, S; Parks, CG; Goldner, WS; Kamel, F; Umbach, DM; Ward, MH; Lerro, CC; Koutros, S; Hofmann, JN; Beane Freeman, LE; Sandler, DP	2018	Y	Human	1 Epidemiology Branch, National Institute of Environmental Health Sciences (NIEHS) , Research Triangle Park, North Carolina, USA.	Compilation	epi	Environmental health perspectives
29698872	A nested case-control study of polychlorinated biphenyls, organochlorine pesticides, and thyroid cancer in the Janus Serum Bank cohort.	Lerro, CC; Jones, RR; Langseth, H; Grimsrud, TK; Engel, LS; Sjödin, A; Choo-Wosoba, H; Albert, P; Ward, MH	2018	Y	Cancer	Occupational and Environmental Epidemiology Branch, Division of Cancer Epidemiology and Genetics, National Cancer Institute, Rockville, MD, USA. Electronic address: lerrocc@mail.nih.gov.	Organohalogen (organochlorine)	epi	Environmental research
IN VIVO
PMID	Article Title	All Authors (Last, Initials)	Year	Usefull (Y/N)	Reason	Departament	Class	Experimental	Journal
24824690	Changes in thyroid status of rats after prolonged exposure to low dose dichlorodiphenyltrichloroethane.	Yaglova, NV; Yaglov, VV	2014	Y	low dose: 1.890±0.086 μg/kg for 6 weeks	Research Institute of Human Morphology, Russian Academy of Medical Sciences, Moscow, Russia, yaglova@mail.ru.	Organochlorines	in vivo	Bulletin of experimental biology and medicine
28361414	Cytophysiological Changes in the Follicular Epithelium of the Thyroid Gland after Long-Term Exposure to Low Doses of Dichlorodiphenyltrichloroethane (DDT).	Yaglova, NV; Yaglov, VV	2017	Y	DDT	Research Institute of Human Morphology, Moscow, Russia. yaglova@mail.ru.	Organochlorines	in vivo	Bulletin of experimental biology and medicine
IN VITRO
PMID	Article Title	All Authors (Last, Initials)	Year	Usefull (Y/N)	Reason	Departament	Class	Experimental	Journal
25093615	Hexachlorobenzene induces TGF-β1 expression, which is a regulator of p27 and cyclin D1 modifications.	Chiappini, F; Pontillo, C; Randi, A; Alvarez, L; Kleiman de Pisarev, DL	2014	Y	Low to high dose	Departamento de Bioquímica Humana, Facultad de Medicina, Universidad de Buenos, Buenos Aires, Argentina.	Organochlorines	in vitro	Toxicology letters
28639207	The cell biology of the thyroid-disrupting mechanism of dichlorodiphenyltrichloroethane (DDT).	Rossi, M; Taddei, AR; Fasciani, I; Maggio, R; Giorgi, F	2018	Y	DDT	Molecular Signaling Section, Laboratory of Bioorganic Chemistry, National Institute of Diabetes and Digestive and Kidney Diseases, Bethesda, MD, USA.	Organochlorines	in vitro	Journal of endocrinological investigation

## Sheet: Organophosphates
ORGANOPHOPHATES
EPI
PMID	Article Title	All Authors (Last, Initials)	Year	Usefull (Y/N)	Reason	Departament	Class	Experimental	Journal
26150671	Organophosphate insecticide use and cancer incidence among spouses of pesticide applicators in the Agricultural Health Study.	Lerro, CC; Koutros, S; Andreotti, G; Friesen, MC; Alavanja, MC; Blair, A; Hoppin, JA; Sandler, DP; Lubin, JH; Ma, X; Zhang, Y; Beane Freeman, LE	2015	Y	Cancer	Occupational and Environmental Epidemiology Branch, Division of Cancer Epidemiology and Genetics, National Cancer Institute, Bethesda, Maryland, USA Yale University School of Public Health, New Haven, Connecticut, USA.	organophosphate	epi	Occupational and environmental medicine
29028673	Association Between Organophosphate Pesticide Exposure and Thyroid Hormones in Pregnant Women.	Wang, Y; Chen, L; Wang, C; Hum, Y; Gao, Y; Zhou, Y; Shi, R; Zhang, Y; Kamijima, M; Ueyama, J; Tian, Y	2017	Y	Human	Form the aMOE and Shanghai Key Laboratory of Children's Environmental Health, Xinhua Hospital, Shanghai Jiao Tong University School of Medicine, Shanghai, China; bDepartment of Neonatology, Xinhua Hospital, Shanghai Jiao Tong University School of Medicine, Shanghai, China; cDepartment of Environmental Health, School of Public Health, Shanghai Jiao Tong University School of Medicine, Shanghai, Chi…	organophosphate	epi	Epidemiology (Cambridge, Mass.)
29995019	Pesticide Exposure and Thyroid Function in Elementary School Children Living in an Agricultural Area, Brebes District, Indonesia.	Suhartono, S; Kartini, A; Subagio, HW; Budiyono, B; Utari, A; Suratman, S; Sakundarno, M	2018	Y	Children	Department of Environmental Health, Faculty of Public Health, Diponegoro University, Semarang, Indonesia. suhartono_damas@yahoo.com.	Organophosphate	epi	The international journal of occupational and environmental medicine
29267272	When enough data are not enough to enact policy: The failure to ban chlorpyrifos	Trasande, L	2017	Y	chlorpyrifos	Department of Pediatrics, New York University School of Medicine, New York, New York, United States of America.	organophosphate	review	PLoS biology
IN VIVO
PMID	Article Title	All Authors (Last, Initials)	Year	Usefull (Y/N)	Reason	Departament	Class	Experimental	Journal
24630256	Impact of a short-term diazinon exposure on the osmoregulation potentiality of Caspian roach (Rutilus rutilus) fingerlings.	Katuli, KK; Amiri, BM; Massarsky, A; Yelghi, S; Ghasemzadeh, J	2014	Y	diazinon	Department of Fisheries, Faculty of Natural Resources, University of Tehran, Karaj, Iran. Electronic address: khosravi.kh@ut.ac.ir.	organophosphate	in vivo	Chemosphere
29083300	Fish larval recruitment to reefs is a thyroid hormone-mediated metamorphosis sensitive to the pesticide chlorpyrifos.	Holzer, G; Besson, M; Lambert, A; François, L; Barth, P; Gillet, B; Hughes, S; Piganeau, G; Leulier, F; Viriot, L; Lecchini, D; Laudet, V	2017	Y	Chlorpyrifos	Institut de Génomique Fonctionnelle de Lyon, Université de Lyon, Université Claude Bernard Lyon 1, UMR CNRS 5242, Ecole Normale Supérieure de Lyon, Lyon, France.	organophosphate	in vivo	eLife
29803892	Quantitative analysis of in-vivo responses of reproductive and thyroid endpoints in male goldfish exposed to monocrotophos pesticide.	Zhang, X; Liu, W; Wang, J; Tian, H; Wang, W; Ru, S	2018	Y	Monocrotophos (MCP) pesticide	College of Marine Life Sciences, Ocean University of China, Qingdao 266003, China.	organophosphate	in vivo	Comparative biochemistry and physiology. Toxicology & pharmacology : CBP
30744622	The organophosphate pesticide -OP- malathion inducing thyroidal disruptions and failures in the metamorphosis of the Senegalese sole, Solea senegalensis.	Ortiz-Delgado, JB; Funes, V; Sarasquete, C	2019	Y	Target	Instituto de Ciencias Marinas de Andalucía-ICMAN, CSIC Campus Universitario Río San Pedro, 11510, Puerto Real, Cádiz, Spain. juanbosco.ortiz@icman.csic.es.	organophosphate	in vivo	BMC veterinary research
25268935	Monocrotophos pesticide decreases the plasma levels of total 3,3',5-triiodo-l-thyronine and alters the expression of genes associated with the thyroidal axis in female goldfish (Carassius auratus).	Zhang, X; Tian, H; Wang, W; Ru, S	2014	Y	Low to high dose	College of Marine Life Sciences, Ocean University of China, Qingdao, China.	organophosphate	in vivo	PloS one
24912403	Effects of glyphosate-based herbicides on survival, development, growth and sex ratios of wood frog (Lithobates sylvaticus) tadpoles. II: agriculturally relevant exposures to Roundup WeatherMax® and Vision® under laboratory conditions.	Lanctôt, C; Navarro-Martín, L; Robertson, C; Park, B; Jackman, P; Pauli, BD; Trudeau, VL	2014	Y	Low to high dose	Centre for Advanced Research in Environmental Genomics (CAREG), Department of Biology, University of Ottawa, Ottawa, Ontario K1N 6N5, Canada. Electronic address: c.lanctot@cqu.edu.au.	Glyphosate-based	in vivo	Aquatic toxicology (Amsterdam, Netherlands)
IN VITRO
PMID	Article Title	All Authors (Last, Initials)	Year	Usefull (Y/N)	Reason	Departament	Class	Experimental	Journal
29143548	Evaluation on the thyroid disrupting mechanism of malathion in Fischer rat thyroid follicular cell line FRTL-5.	Xiong, J; Tian, L; Qiu, Y; Sun, D; Zhang, H; Wu, M; Wang, J	2018	Y	Insecticide - In vitro	a Research Center for Public Health and Preventive Medicine , West China School of Public Health, Sichuan University , Chengdu , China.	organophosphate	in vitro	Drug and chemical toxicology
27905518	Pesticide toxicogenomics across scales: in vitro transcriptome predicts mechanisms and outcomes of exposure in vivo.	Porreca, I; D'Angelo, F; De Franceschi, L; Mattè, A; Ceccarelli, M; Iolascon, A; Zamò, A; Russo, F; Ravo, M; Tarallo, R; Scarfò, M; Weisz, A; De Felice, M; Mallardo, M; Ambrosino, C	2016	Y	Report essay	IRGS, Biogem, Via Camporeale, 83031, Ariano Irpino, Avellino, Italy.	organophosphate	in vivo/in vitro	Scientific reports

## Sheet: Carbamates
Carbamates
EPI
PMID	Article Title	All Authors (Last, Initials)	Year	Usefull (Y/N)	Reason	Departament	Class	Experimental	Journal
28756521	Increased risk for hypothyroidism after anticholinesterase pesticide poisoning: a nationwide population-based study.	Huang, HS; Lee, KW; Ho, CH; Hsu, CC; Su, SB; Wang, JJ; Lin, HJ; Huang, CC	2017	Y	Too broad	Department of Emergency Medicine, Chi-Mei Medical Center, Tainan, Taiwan.	Carbamate	epi	Endocrine
25198283	Aerial application of mancozeb and urinary ethylene thiourea (ETU) concentrations among pregnant women in Costa Rica: the Infants' Environmental Health Study (ISA).	van Wendel de Joode, B; Mora, AM; Córdoba, L; Cano, JC; Quesada, R; Faniband, M; Wesseling, C; Ruepert, C; Oberg, M; Eskenazi, B; Mergler, D; Lindh, CH	2014	Y	fungicide	Programa Infantes y Salud Ambiental (ISA), Central American Institute for Studies on Toxic Substances (IRET), Universidad Nacional, Heredia, Costa Rica.	carbamate (dithiocarbamate)	epi	Environmental health perspectives
28775130	Occupational pesticide exposure and subclinical hypothyroidism among male pesticide applicators.	Lerro, CC; Beane Freeman, LE; DellaValle, CT; Kibriya, MG; Aschebrook-Kilfoy, B; Jasmine, F; Koutros, S; Parks, CG; Sandler, DP; Alavanja, MCR; Hofmann, JN; Ward, MH	2018	Y	Subclinical / Banned	Division of Cancer Epidemiology and Genetics, National Cancer Institute, Rockville, Maryland, USA.	dinitroaniline / cyclodiene	epi	Occupational and environmental medicine
IN VIVO
PMID	Article Title	All Authors (Last, Initials)	Year	Usefull (Y/N)	Reason	Departament	Class	Experimental	Journal
30408483	The case for thyroid disruption in early life stage exposures to thiram in zebrafish (Danio rerio).	Chen, X; Fang, M; Chernick, M; Wang, F; Yang, J; Yu, Y; Zheng, N; Teraoka, H; Nanba, S; Hiraga, T; Hinton, DE; Dong, W	2019	Y	Target	Inner Mongolia Key Laboratory of Toxicant Monitoring and Toxicology, Collage of Animal Science and Technology, Inner Mongolia University for Nationalities, Tongliao, Inner Mongolia 028000, China; Laboratory for Marine Fisheries Science and Food Production Processes, Qingdao National Laboratory for Marine Science and Technology, Key Laboratory of Maricultural Organism Disease Control, Ministry of …	carbamate (dithiocarbamate)	in vivo	General and comparative endocrinology
25304545	Embryonic exposure to carbendazim induces the transcription of genes related to apoptosis, immunotoxicity and endocrine disruption in zebrafish (Danio rerio).	Jiang, J; Wu, S; Wu, C; An, X; Cai, L; Zhao, X	2014	Y	No thyroid endpoints	State Key Laboratory Breeding Base for Zhejiang Sustainable Pest and Disease Control, Institute of Quality and Standard for Agro-products, Zhejiang Academy of Agricultural Sciences, Hangzhou 310021, Zhejiang, China; Key Laboratory for Pesticide Residue Detection of Ministry of Agriculture, Institute of Quality and Standard for Agro-products, Zhejiang Academy of Agricultural Sciences, Hangzhou 310…	carbamate	in vivo	Fish & shellfish immunology

## Sheet: Pyrethroids
PYRETHROIDS
IN VIVO
PMID	Article Title	All Authors (Last, Initials)	Year	Usefull (Y/N)	Reason	Departament	Class	Experimental	Journal	Journal
30681194	The effects of bifenthrin and temperature on the endocrinology of juvenile Chinook salmon.	Giroux, M; Gan, J; Schlenk, D	2019	Y	Mixture	Environmental Toxicology Graduate Program, University of California Riverside, Riverside, California, USA.	pyrethroid	in vivo	Environmental toxicology and chemistry	Environ Toxicol Chem
26994367	Permethrin is a potential thyroid-disrupting chemical: In vivo and in silico envidence.	Tu, W; Xu, C; Jin, Y; Lu, B; Lin, C; Wu, Y; Liu, W	2016	Y	In vivo - in silico	Research Institute of Poyang Lake, Jiangxi Academy of Sciences, Nanchang 330029, China; College of Environment, Zhejiang University of Technology, Hangzhou 310032, China.	pyrethroid	in vivo in silico	Aquatic toxicology (Amsterdam, Netherlands)	Aquat Toxicol
26556752	Acute exposure to synthetic pyrethroids causes bioconcentration and disruption of the hypothalamus-pituitary-thyroid axis in zebrafish embryos.	Tu, W; Xu, C; Lu, B; Lin, C; Wu, Y; Liu, W	2016	Y	Target	Research Institute of Poyang Lake, Jiangxi Academy of Sciences, Nanchang 330029, China; Institute of Environmental Science, College of Biological and Environmental Engineering, Zhejiang University of Technology, Hangzhou 310032, China.	pyrethroid synthetic	in vivo	The Science of the total environment	Sci Total Environ
29480392	Early life exposure of zebrafish (Danio rerio) to synthetic pyrethroids and their metabolites: a comparison of phenotypic and behavioral indicators and gene expression involved in the HPT axis and innate immune system.	Xu, C; Li, X; Jin, M; Sun, X; Niu, L; Lin, C; Liu, W	2018	Y	Inmune	Research Center of Environmental Science, College of Environment, Zhejiang University of Technology, Hangzhou, 310032, China. chaoxu@zjut.edu.cn.	pyrethroid synthetic	in vivo	Environmental science and pollution research international	Environ Sci Pollut Res Int
28970022	Stereoselective degradation and thyroid endocrine disruption of lambda-cyhalothrin in lizards (Eremias argus) following oral exposure.	Chang, J; Hao, W; Xu, Y; Xu, P; Li, W; Li, J; Wang, H	2018	Y	Pesticide	Research Center for Eco-Environmental Science, Chinese Academy of Sciences, Shuangqing RD 18, Beijing 100085, China; University of Chinese Academy of Sciences, Yuquan RD 19 a, Beijing 100049, China.	pyrethroid pesticides	in vivo	Environmental pollution (Barking, Essex : 1987)	Environ Pollut	yes
28772355	Environmentally relevant levels of λ-cyhalothrin, fenvalerate, and permethrin cause developmental toxicity and disrupt endocrine system in zebrafish (Danio rerio) embryo.	Zhang, Q; Zhang, Y; Du, J; Zhao, M	2017	Y	λ-cyhalothrin	Key Laboratory of Microbial Technology for Industrial Pollution Control of Zhejiang Province, College of Environment, Zhejiang University of Technology, Hangzhou, Zhejiang, 310032, China.	pyrethroids	in vivo	Chemosphere	Chemosphere
28369636	Maternal Fenvalerate Exposure Induces Fetal Intrauterine Growth Restriction Through Disrupting Placental Thyroid Hormone Receptor Signaling.	Wang, B; Liu, JJ; Wang, Y; Fu, L; Shen, R; Yu, Z; Wang, H; Chen, YH; Zhang, C; Meng, XH; Xu, DX	2017	Y	human	Department of Maternal, Child, & Adolescent Health, Anhui Medical University, Hefei, China.	pyrethroids	in vivo	Toxicological sciences : an official journal of the Society of Toxicology	Toxicol Sci
24836137	Prenatal pyrethroid insecticide exposure and thyroid hormone levels and birth sizes of neonates.	Zhang, J; Yoshinaga, J; Hisada, A; Shiraishi, H; Shimodaira, K; Okai, T; Koyama, M; Watanabe, N; Suzuki, E; Shirakawa, M; Noda, Y; Komine, Y; Ariki, N; Kato, N	2014	Y	Children	Department of Environmental Studies, University of Tokyo, Kashiwanoha 5-1-5, Kashiwa, Chiba 277-8563, Japan.	pyrethroids	in vivo	The Science of the total environment	Sci Total Environ

## Sheet: Neonicotinoids
NEONICS
IN VIVO
PMID	Article Title	All Authors (Last, Initials)	Year	Usefull (Y/N)	Reason	Departament	Class	Experimental	Journal	Journal
25496744	The neonicotinoid pesticide imidacloprid and the dithiocarbamate fungicide mancozeb disrupt the pituitary-thyroid axis of a wildlife bird.	Pandey, SP; Mohanty, B	2015	Y	imidacloprid and mancozeb	Department of Zoology, University of Allahabad, Allahabad 211002, India. Electronic address: surya.zoology@gmail.com.	neonicotinoid/ dithiocarbamate	in vivo	Chemosphere	Chemosphere
IN VITRO
PMID	Article Title	All Authors (Last, Initials)	Year	Usefull (Y/N)	Reason	Departament	Class	Experimental	Journal	Journal
29952068	Evaluation of neonicotinoid insecticides for oestrogenic, thyroidogenic and adipogenic activity reveals imidacloprid causes lipid accumulation.	Mesnage, R; Biserni, M; Genkova, D; Wesolowski, L; Antoniou, MN	2018	Y	No effect - Substitute	Gene Expression and Therapy Group, King's College London, Faculty of Life Sciences & Medicine, Department of Medical and Molecular Genetics, Guy's Hospital, London, SE1 9RT, UK.	neonycotinic	in vitro	Journal of applied toxicology : JAT	J Appl Toxicol

## Sheet: Phenylpyrazoles
PHENYLPYRAZOLEN
EPI
PMID	Article Title	All Authors (Last, Initials)	Year	Usefull (Y/N)	Reason	Departament	Class	Experimental	Journal
30718154	Distribution of fipronil in humans, and adverse health outcomes of in utero fipronil sulfone exposure in newborns.	Kim, YA; Yoon, YS; Kim, HS; Jeon, SJ; Cole, E; Lee, J; Kho, Y; Cho, YH	2019	Y	Pregnant	Departments of Obstetrics and Gynecology, Inje University Ilsan Paik Hospital, Goyang-si, Gyeonggi-do, 10380, Republic of Korea.	phenylpyrazolen (fipronil)	epi	International journal of hygiene and environmental health
IN VIVO
PMID	Article Title	All Authors (Last, Initials)	Year	Usefull (Y/N)	Reason	Departament	Class	Experimental	Journal
26409903	Prenatal exposure to fipronil disturbs maternal aggressive behavior in rats	Magalhães, JZ; Udo, MS; Sánchez-Sarmiento, AM; Carvalho, MP; Bernardi, MM; Spinosa, HS	2015	Y	Fipronil - No effect	Undergraduate in Biological Science, Universidade Presbiteriana Mackenzie, São Paulo, Brazil. Electronic address: juliazaccam@gmail.com.	phenylpyrazolen (fipronil)	in vivo	Neurotoxicology and teratology
IN VITRO
PMID	Article Title	All Authors (Last, Initials)	Year	Usefull (Y/N)	Reason	Departament	Class	Experimental	Journal
25112704	Endocrine disrupting potential of fipronil and its metabolite in reporter gene assays.	Lu, M; Du, J; Zhou, P; Chen, H; Lu, C; Zhang, Q	2015	Y	Fipronil + metabolite	College of Biological and Environmental Engineering, Zhejiang University of Technology, Hangzhou 310032, China.	phenylpyrazolen (fipronil)	in vitro	Chemosphere

## Sheet: Mixture
MIXTURE
IN VIVO
PMID	Article Title	All Authors (Last, Initials)	Year	Usefull (Y/N)	Reason	Departament	Class	Experimental	Journal
28237669	Disruption of the hypothalamic-pituitary-thyroid axis on co-exposures to dithiocarbamate and neonicotinoid pesticides: Study in a wildlife bird, Amandava amandava.	Pandey, SP; Mohanty, B	2017	Y	Mixture	Department of Zoology, University of Allahabad, Allahabad 211002, U.P., India.	Mixture	in vivo	Neurotoxicology
24530807	Pesticides in mixture disrupt metabolic regulation: in silico and in vivo analysis of cumulative toxicity of mancozeb and imidacloprid on body weight of mice.	Bhaskar, R; Mohanty, B	2014	Y	Mxiture (Mancozeb (MCZ) - Amidacloprid (IMI))	Department of Zoology, University of Allahabad, Allahabad 211002, India.	Mixture	in silico/in vivo	General and comparative endocrinology
25497286	Assessment of serum biomarkers in rats after exposure to pesticides of different chemical classes.	Moser, VC; Stewart, N; Freeborn, DL; Crooks, J; MacMillan, DK; Hedge, JM; Wood, CE; McMahen, RL; Strynar, MJ; Herr, DW	2015	Y	Mixture	Neurotoxicology Branch/Toxicity Assessment Division, National Health and Environmental Effects Research Laboratory, Office of Research and Development, US Environmental Protection Agency, Research Triangle Park, NC 27711, USA. Electronic address: Moser.ginger@epa.gov.	Mixture	in vivo	Toxicology and applied pharmacology
28119157	Endocrine disrupting pesticides impair the neuroendocrine regulation of reproductive behaviors and secondary sexual characters of red munia (Amandava amandava).	Pandey, SP; Tsutsui, K; Mohanty, B	2017	Y	Mixtures (mancozeb-MCZ a/ imidacloprid-IMI)	Department of Zoology, University of Allahabad, Allahabad 211002, U.P., India.	Mixture	in vivo	Physiology & behavior

## Sheet: Removed after first filter
ARTICLES REMOVED AFTER FIRST FILTER
PMID	Article Title	All Authors (Last, Initials)	Year	Usefull (Y/N)	Reason of removal	Departament	Class	Journal
29573713	Mode of action and human relevance of pronamide-induced rat thyroid tumors.	Papineni, S; Marty, MS; Rasoulpour, RJ; LeBaron, MJ; Pottenger, LH; Eisenbrandt, DL	2015	N	Cancer	Dow AgroSciences, LLC, Indianapolis, IN 46268, USA. Electronic address: SPapineni@dow.com.	benzamides	Regulatory toxicology and pharmacology : RTP
27541960	[Disseminated cysticercosis: report of three cases in Togo].	Mouhari-Toure, A; N'Timon, B; Kumako, V; Darre, T; Saka, B; Tchaou, M; Amegbor, K; Kombate, K; Balogou, AA; Pitche, P	2015	N	Off-target	CHU-Kara, Kara, Togo, ambatoure@gmail.com.	carbamate	Bulletin de la Societe de pathologie exotique (1990)
29698872	Phase I study of XL281 (BMS-908662), a potent oral RAF kinase inhibitor, in patients with advanced solid tumors.	Dickson, MA; Gordon, MS; Edelman, G; Bendell, JC; Kudchadkar, RR; LoRusso, PM; Johnston, SH; Clary, DO; Schwartz, GK	2015	N	Cancer	Memorial Sloan Kettering Cancer Center, New York, NY, USA, dicksonm@mskcc.org.	carbamate	Investigational new drugs
28936635	Antioxidant therapy improves non-thyroidal illness syndrome in uremic rats.	Yang, P; Li, Y; Xu, G	2016	N	Off-target	a Department of Nephrology, Second Affiliated Hospital , Nanchang University , Nanchang , China ;	carbamate	Renal failure
27480594	Aldehyde dehydrogenase activity plays no functional role in stem cell-like properties in anaplastic thyroid cancer cell lines.	Shimamura, M; Kurashige, T; Mitsutake, N; Nagayama, Y	2017	N	Cancer	Department of Molecular Medicine, Atomic Bomb Disease Institute, Nagasaki University, 1-12-4 Sakamoto, Nagasaki, 852-8523, Japan.	carbamate	Endocrine
26971167	An uncommon manifestation of a common disease	Dsilva, G; Kulkarni, V; Aher, S	2017	N	Off-target	Department of Medicine, Topiwala National Medical College and B.Y.L. Nair Ch. Hospital, Mumbai-400 008, India	carbamate	Annals of parasitology
27103609	The Effects of Mitiglinide and Repaglinide on Postprandial Hyperglycemia in Patients Undergoing Methylprednisolone Pulse Therapy.	Tanaka, K; Okada, Y; Mori, H; Torimoto, K; Arao, T; Tanaka, Y	2018	N	Not thyroid endpoints	First Department of Internal Medicine, School of Medicine, University of Occupational and Environmental Health, Japan, Japan.	carbamate	Internal medicine (Tokyo, Japan)
30114598	Endpoint sensitivity in Amphibian Metamorphosis Assay.	Dang, Z	2019	N	Essay analysis	National Institute for Public Health and the Environment (RIVM), A. van Leeuwenhoeklaan 9, 3720 BA Bilthoven, The Netherlands. Electronic address: zhichao.dang@rivm.nl.	carbamate	Ecotoxicology and environmental safety
28913779	Current concepts in neuroendocrine disruption.	León-Olea, M; Martyniuk, CJ; Orlando, EF; Ottinger, MA; Rosenfeld, C; Wolstenholme, J; Trudeau, VL	2014	N	Too broad	Departamento de Neuromorfología Funcional, Dirección de Investigaciones en Neurociencias, Instituto Nacional de Psiquiatría, R.F.M., México D.F., México.	Compilation	General and comparative endocrinology
30639745	EDC-2: The Endocrine Society's Second Scientific Statement on Endocrine-Disrupting Chemicals.	Gore, AC; Chappell, VA; Fenton, SE; Flaws, JA; Nadal, A; Prins, GS; Toppari, J; Zoeller, RT	2015	N	Too broad	Pharmacology and Toxicology (A.C.G.), College of Pharmacy, The University of Texas at Austin, Austin, Texas 78734; Division of the National Toxicology Program (V.A.C., S.E.F.), National Institute of Environmental Health Sciences, National Institutes of Health, Research Triangle Park, North Carolina 27709; Department of Comparative Biosciences (J.A.F.), University of Illinois at Urbana-Champaign, …	Compilation	Endocrine reviews
25846366	Executive Summary to EDC-2: The Endocrine Society's Second Scientific Statement on Endocrine-Disrupting Chemicals	Gore, AC; Chappell, VA; Fenton, SE; Flaws, JA; Nadal, A; Prins, GS; Toppari, J; Zoeller, RT	2015	N	Too broad	Pharmacology and Toxicology (A.C.G.), College of Pharmacy, The University of Texas at Austin, Austin, Texas 78734; Division of the National Toxicology Program (V.A.C., S.E.F.), National Institute of Environmental Health Sciences, National Institutes of Health, Research Triangle Park, North Carolina 27709; Department of Comparative Biosciences (J.A.F.), University of Illinois at Urbana-Champaign, …	Compilation	Endocrine reviews
25707858	The influence of organophosphate and carbamate on sperm chromatin and reproductive hormones among pesticide sprayers.	Jamal, F; Haque, QS; Singh, S; Rastogi, SK	2016	N	Retracted	Department of Biochemistry, Dr. Ram Manohar Lohia Avadh University, Faizabad, Uttar Pradesh, India journal.farrukh@gmail.com.	Compilation	Toxicology and industrial health
29017816	How well can in vitro data predict in vivo effects of chemicals? Rodent carcinogenicity as a case study.	Anthony Tony Cox, L; Popken, DA; Kaplan, AM; Plunkett, LM; Becker, RA	2016	N	Tricky	Cox Associates, 503 Franklin St., Denver, CO, 80218, USA. Electronic address: tcoxdenver@aol.com.	Compilation	Regulatory toxicology and pharmacology : RTP
30448662	Endocrine disruptors affect larval zebrafish behavior: Testing potential mechanisms and comparisons of behavioral sensitivity to alternative biomarkers.	Fraser, TWK; Khezri, A; Lewandowska-Sabat, AM; Henry, T; Ropstad, E	2017	N	No good	Department of Production Animal Clinical Sciences, Faculty of Veterinary Medicine, Norwegian University of Life Sciences, Oslo, Norway. Electronic address: thomas.fraser@nmbu.no.	Compilation	Aquatic toxicology (Amsterdam, Netherlands)
28073034	Direct quantification of gamma H2AX by cell-based high throughput screening for evaluation of genotoxicity of pesticides in a human thyroid cell lines.	Hershman, JM; France, B; Hon, K; Damoiseaux, R	2017	N	High dosis	West Los Angeles VA Medical Center, David Geffen School of Medicine at UCLA, Los Angeles, California.	Compilation	Environmental and molecular mutagenesis
25893814	Pesticides as risk factors for head and neck cancer: A review.	Brasil, VLM; Ramos Pinto, MB; Bonan, RF; Kowalski, LP; da Cruz Perez, DE	2018	N	Cancer - Limited evidence	Oral Pathology Section, Department of Clinical and Preventive Dentistry, School of Dentistry, Universidade Federal de Pernambuco, Recife, Pernambuco, Brazil.	Compilation	Journal of oral pathology & medicine : official publication of the International Association of Oral Pathologists and the American Academy of Oral Pathology
25476894	Therapeutic effects of oral liothyronine on aluminum phosphide poisoning as an adjuvant therapy: A clinical trial.	Goharbari, MH; Taghaddosinejad, F; Arefi, M; Sharifzadeh, M; Mojtahedzadeh, M; Nikfar, S; Baeeri, M; Rahimifard, M; Abdollahi, M	2018	N	Off-target	1 Department of Toxicology and Pharmacology, Faculty of Pharmacy, Tehran University of Medical Sciences, Tehran, Iran.	Compilation	Human & experimental toxicology
26895214	High-throughput screening and chemotype-enrichment analysis of ToxCast phase II chemicals evaluated for human sodium-iodide symporter (NIS) inhibition.	Wang, J; Hallinger, DR; Murr, AS; Buckalew, AR; Lougee, RR; Richard, AM; Laws, SC; Stoker, TE	2019	N	Off-target	Endocrine Toxicology Branch, Toxicity Assessment Division, National Health and Environmental Effects Research Laboratory, Office of Research and Development, U.S. Environmental Protection Agency, Research Triangle Park, NC, 27711, USA; Oak Ridge Institute for Science and Education, U.S. Department of Energy, Oak Ridge, TN 37831, USA.	Compilation	Environment international
28040834	Persistent organic pollutants, pesticides, and the risk of thyroid cancer: systematic review and meta-analysis.	Han, MA; Kim, JH; Song, HS	2018	N	Cancer	Departments of Preventive Medicine.	Compilation (Persistent organic pollutants)	European journal of cancer prevention : the official journal of the European Cancer Prevention Organisation (ECP)
29420875	Triorganotin compounds--ligands for "rexinoid" inducible transcription factors: biological effects.	Brtko, J; Dvorak, Z	2015	N	RXR interaction	Laboratory of Molecular Endocrinology, Institute of Experimental Endocrinology, Slovak Academy of Sciences, Vlarska 3, 83306 Bratislava, Slovak Republic. Electronic address: julius.brtko@savba.sk.	engorganometallic compounds	Toxicology letters
29021480	Thyroid tumor formation in the male mouse induced by fluopyram is mediated by activation of hepatic CAR/PXR nuclear receptors.	Rouquié, D; Tinwell, H; Blanck, O; Schorsch, F; Geter, D; Wason, S; Bars, R	2014	N	Cancer	Bayer SAS, Bayer CropScience, 355 rue Dostoïevski, CS 90153, 06906 Sophia Antipolis, France. Electronic address: david.rouquie@bayer.com.	Fluopyram	Regulatory toxicology and pharmacology : RTP
30384058	Glyphosate rodent carcinogenicity bioassay expert panel review.	Williams, GM; Berry, C; Burns, M; de Camargo, JLV; Greim, H	2016	N	Cancer	a New York Medical College , Valhalla , NY , USA.	Glyphosate-based	Critical reviews in toxicology
28073049	Toxicokinetics of Imidacloprid-Coated Wheat Seeds in Japanese Quail ( Coturnix japonica) and an Evaluation of Hazard.	Bean, TG; Gross, MS; Karouna-Renier, NK; Henry, PFP; Schultz, SL; Hladik, ML; Kuivila, KM; Rattner, BA	2019	N	Not thyroid endpoints	Department of Environmental Science and Technology , University of Maryland , College Park , Maryland 20742 , United States.	neonicotinoid	Environmental science & technology
30213553	2D europium coordination polymer as a regenerable fluorescence probe for efficiently detecting fipronil.	Yang, SL; Lu, JN; Zhang, SJ; Zhang, CX; Wang, QL	2018	N	pesticide detection essay	College of Chemical Engineering and Materials Science, Tianjin University of Science and Technology, Tianjin 300457, P. R. China. zcx@tust.edu.cn.	No accurate	The Analyst
28531659	A case of calciphylaxis in a patient with hypoparathyroidism and normal renal function.	Erdel, BL; Juneja, R; Evans-Molina, C	2014	N	Off-target	Department of Medicine, Indiana University School of Medicine, Indianapolis, Indiana.	No accurate	Endocrine practice : official journal of the American College of Endocrinology and the American Association of Clinical Endocrinologists
25108122	Amiodarone-induced thyrotoxicosis: type 1 or type 2?	Khan, A; Puttanna, A; Raskauskiene, D	2014	N	Thyroid toxicosis	Walsall Hospitals Healthcare NHS Trust, Walsall, UK.	No accurate	BMJ case reports
26318563	An evaluation of the potential drug interaction between warfarin and levothyroxine.	Wood, MD; Delate, T; Clark, M; Clark, N; Horn, JR; Witt, DM	2014	N	No thyroid endpoints	Kaiser Permanente Colorado, Aurora, CO, USA.	No accurate	Journal of thrombosis and haemostasis : JTH
26397822	Discovery of 2-[3,5-dichloro-4-(5-isopropyl-6-oxo-1,6-dihydropyridazin-3-yloxy)phenyl]-3,5-dioxo-2,3,4,5-tetrahydro[1,2,4]triazine-6-carbonitrile (MGL-3196), a Highly Selective Thyroid Hormone Receptor β agonist in clinical trials for the treatment of dyslipidemia.	Kelly, MJ; Pietranico-Cole, S; Larigan, JD; Haynes, NE; Reynolds, CH; Scott, N; Vermeulen, J; Dvorozniak, M; Conde-Knape, K; Huang, KS; So, SS; Thakkar, K; Qian, Y; Banner, B; Mennona, F; Danzi, S; Klein, I; Taub, R; Tilley, J	2014	N	Off-target	Madrigal Pharmaceuticals, Inc. , Fort Washington, Pennsylvania 19034, United States.	No accurate	Journal of medicinal chemistry
	Physiologic and metabolic safety of butyrylcholinesterase gene therapy in mice.	Murthy, V; Gao, Y; Geng, L; LeBrasseur, NK; White, TA; Parks, RJ; Brimijoin, S	2014	N	Off-target	Department of Molecular Pharmacology and Experimental Therapeutics, Mayo Clinic, Rochester, MN 55905, USA; Robert and Arlene Kogod Center on Aging, Mayo Clinic, Rochester, MN 55905, USA. Electronic address: Murthy.Vishakantha@mayo.edu.	No accurate	Vaccine
24530523	Prescriber perceptions of a near real-time fax alert program for potential drug-drug interactions.	Armstrong, EP; Wang, SM; Hines, LE; Patel, BV; Leslie, RS; Malone, DC	2014	N	Not thyroid endpoints	College of Pharmacy, University of Arizona, Tucson, AZ 85721. armstrong@pharmacy.arizona.edu.	No accurate	Journal of managed care & specialty pharmacy
28629112	Effects of endocrine disruptors in the development of the female reproductive tract.	Costa, EM; Spritzer, PM; Hohl, A; Bachega, TA	2014	N	Not thyroid related	Unidade de Endocrinologia do Desenvolvimento, Laboratório de Hormônios e Genética Molecular LIM42, Hospital das Clínicas, Faculdade de Medicina da Universidade de São Paulo, São Paulo, SP, Brazil.	No accurate	Arquivos brasileiros de endocrinologia e metabologia
26544531	Occupation and thyroid cancer.	Aschebrook-Kilfoy, B; Ward, MH; Della Valle, CT; Friesen, MC	2014	N	Cancer	Department of Health Studies, University of Chicago, Chicago, Illinois, USA.	No accurate	Occupational and environmental medicine
26414233	A difficult diagnosis: severe Graves' ophthalmolopathy.	Yip, IY; Mushtaq, F; Reuser, T	2015	N	Off-target	Department of Ophthalmology, Heart of England NHS Trust, Birmingham, UK.	No accurate	BMJ case reports
25647813	Association Between Chronic Hepatitis B Virus Infection and Risk of Osteoporosis: A Nationwide Population-Based Study.	Chen, CH; Lin, CL; Kao, CH	2015	N	Off-target	From the Digestive Disease Center, Show-Chwan Memorial Hospital, Changhua (C-HC), Hungkuang University, Taichung (C-HC), Meiho University of Technology, Pingtung (C-HC), Management Office for Health Data, China Medical University Hospital (C-LL), College of Medicine (C-LL), Graduate Institute of Clinical Medical Science and School of Medicine, College of Medicine, China Medical University (C-HK);…	No accurate	Medicine
26879462	Correlation Between Home INR and Core Laboratory INR in Patients Supported with Continuous-Flow Left Ventricular Assist Devices.	Dionizovik-Dimanovski, M; Levin, AP; Fried, J; Mody, KP; Simonich, E; Garan, AR; Yuzefpolskaya, M; Takayama, H; Naka, Y; Colombo, PC; Kalesan, B; Uriel, N; Jorde, UP	2015	N		From the *Division of Cardiology, Department of Medicine, Columbia University Medical Center, New York, New York; †Department of Surgery, Columbia University Medical Center, New York, New York; ‡Department of Epidemiology, Columbia University Medical Center, New York, New York; and §Division of Cardiology, Department of Medicine, University of Chicago, Chicago, Illinois.	No accurate	ASAIO journal (American Society for Artificial Internal Organs : 1992)
29078070	Lung Perfusion SPECT: Application in a Patient With Tetralogy of Fallot and Suspected Pulmonary Thromboemboli.	Ranji Amjad, M; Abbasi, M; Farzanehfar, S	2015	N	Off-target	Research Institute for Nuclear Medicine, Shariati Hospital, Tehran University of Medical Sciences, Tehran, Iran.	No accurate	Iranian journal of radiology : a quarterly journal published by the Iranian Radiological Society
28640454	A 46-Year-Old Woman With Dyspnea From an Inhalational Exposure, Triggering Thyroid Storm and Subsequent Multi-Organ System Failure.	Moraco, AH; Banauch, G; Kopec, S	2015	N	Clinical case	UMass Memorial Medical Center, Department of Pulmonary, Allergy and Critical Care, Worcester, MA, USA andrewmoraco@gmail.com.	No accurate	Journal of intensive care medicine
29489035	Sensitivity of animals to chemical compounds links to metabolic rate.	Baas, J; Kooijman, SA	2015	N	No thyroid endpoints	Centre Ecology and Hydrology, MacLean Building Benson Lane, Wallingford, Oxfordshire, OX10 8BB, UK, janbaa@ceh.ac.uk.	No accurate	Ecotoxicology (London, England)
29233028	Artificial neural network-based pharmacogenomic algorithm for warfarin dose optimization.	Pavani, A; Naushad, SM; Kumar, RM; Srinath, M; Malempati, AR; Kutala, VK	2016	N	Off-target	Department of Clinical Pharmacology & Therapeutics, Nizam's Institute of Medical Sciences, Hyderabad 500082, India.	No accurate	Pharmacogenomics
30826616	Deep vein thrombosis, an unreported first manifestation of polyglandular autoimmune syndrome type III.	Horsey, M; Hogan, P; Oliver, T	2016	N	Off-target	Georgetown University School of Medicine , Washington, District of Columbia , USA.	No accurate	Endocrinology, diabetes & metabolism case reports
29023046	Effect of Anticoagulation Medication on the Thyroid Fine-Needle Aspiration Pathologic Diagnostic Sufficiency Rate.	Denham, SL; Ismail, A; Bolus, DN; Lockhart, ME	2016	N	Off-target	Department of Radiology, University of Alabama at Birmingham, Birmingham, Alabama, USA. ldenham@uabmc.edu.	No accurate	Journal of ultrasound in medicine : official journal of the American Institute of Ultrasound in Medicine
26906244	Effect of diseases on response to vitamin K antagonists.	Self, TH; Owens, RE; Sakaan, SA; Wallace, JL; Sands, CW; Howard-Thompson, A	2016	N	Vitamin K	a Methodist University Hospital, Clinical Pharmacist , Memphis , TN , USA ;	No accurate	Current medical research and opinion
28857258	Incidence rate and pattern of clinically relevant potential drug-drug interactions in a large outpatient population of a developing country.	Nabovati, E; Vakili-Arki, H; Taherzadeh, Z; Saberi, MR; Abu-Hanna, A; Eslami, S	2016	N	Not thyroid endpoints	Student Research Committee, Department of Medical Informatics, Faculty of Medicine, Mashhad University of Medical Sciences, Mashhad, I.R. Iran.	No accurate	Research in pharmaceutical sciences
27965130	Liquid Chromatography-Mass Spectrometry/Mass Spectrometry Analysis and Pharmacokinetic Assessment of Ponatinib in Sprague-Dawley Rats.	Wang, P; Peng, Y; Zhang, X; Fei, F; Wang, S; Feng, S; Huang, J; Wang, H; Aa, J; Wang, G	2016	N	Pesticide detection essay	Jiangsu Province Key Laboratory of Drug Metabolism and Pharmacokinetics, Jiangsu Key Laboratory of Drug Design and Optimization, China Pharmaceutical University, Nanjing, China.	No accurate	Oncology and therapy
28202579	Prompt diagnosis of AF lowers risk of complications.	Leo, M; Betts, T	2016	N	Off-target		No accurate	The Practitioner
30006252	The effect of CYP2C9 and VKORC1 genetic polymorphisms on warfarin dose requirements in a pediatric population.	Dilge Taşkın, B; Kula, S; Ergün, MA; Altun, D; Olguntürk, R; Tunaoğlu, FS; Oğuz, AD; Gürsel, T	2016	N	Children	Department of Pediatric Neurology, Ankara Children's Hematology Oncology Training and Research Hospital, Ankara-Turkey.	No accurate	Anatolian journal of cardiology
29908479	The effects of fenvalerate on hepatic and cerebral xenobiotic metabolizing enzymes in selenium and/or iodine deficient rats.	Caglayan, A; Kocer-Gumusel, B; Erkekoglu, P; Hincal, F	2016	N	Not thyroid endpoints	Hacettepe University, Faculty of Pharmacy, Department of Toxicology, Ankara 06100 Turkey.	No accurate	Iranian journal of basic medical sciences
30685774	Use of anticoagulation in thyroid disease.	Polmear, JL; Hare, MJ; Catford, SR; Topliss, DJ; Dooley, MJ	2016	N	Off-target		No accurate	Australian family physician
30476775	Epidemiological trends of hormone-related cancers in Slovenia.	Zadnik, V; Krajc, M	2016	N	Cancer		No accurate	Arhiv za higijenu rada i toksikologiju
28973306	Assessment of the Impact of L-Thyroxine Therapy on Bleeding Risk in Patients Receiving Vitamin K Antagonists.	Moustafa, F; Malhomme, R; Pereira, B; Barres, A; Saint-Denis, J; Dutheil, F; Batisse, M; Schmidt, J	2017	N	Off-target	Emergency Department, Clermont-Ferrand University Hospital, 58 Rue Montalembert, 63003, Clermont-Ferrand, France. fmoustafa@chu-clermontferrand.fr.	No accurate	Clinical drug investigation
29499468	BRAFV600E and RET/PTC Promote Proliferation and Migration of Papillary Thyroid Carcinoma Cells In Vitro by Regulating Nuclear Factor-κB.	Zhou, D; Li, Z; Bai, X	2017	N	Cancer	Department of General Surgery, Zhujiang Hospital, Southern Medical University, Guangzhou, Guangdong, China (mainland).	No accurate	Medical science monitor : international medical journal of experimental and clinical research
30362975	Comparison of Mortality and Nonfatal Cardiovascular Events in Adults With Atrial Fibrillation With Versus Without Levothyroxine Treatment.	Wändell, P; Carlsson, AC; Holzmann, MJ; Ärnlöv, J; Sundquist, J; Sundquist, K	2017	N	Offtarget	Division of Family Medicine and Primary Care, Department of Neurobiology, Care Science and Society, Karolinska Institutet, Huddinge, Sweden. Electronic address: per.wandell@ki.se.	No accurate	The American journal of cardiology
27265299	Estimating medication stopping fraction and real-time prevalence of drug use in pharmaco-epidemiologic databases. An application of the reverse waiting time distribution.	Støvring, H; Pottegård, A; Hallas, J	2017	N	Off-target	Biostatistics, Department of Public Health, Aarhus University, Aarhus, Denmark.	No accurate	Pharmacoepidemiology and drug safety
25683035	Insulin Plant (Costus pictus) Extract Restores Thyroid Hormone Levels in Experimental Hypothyroidism.	Ashwini, S; Bobby, Z; Sridhar, MG; Cleetus, CC	2017	N	Off-target	Department of Biochemistry, Jawaharlal Institute of Postgraduate Medical Education and Research, Puducherry, India.	No accurate	Pharmacognosy research
25455223	Parathyroidectomy in Hyperparathyroidism-Associated Calciphylaxis in End-Stage Renal Disease Should be Prompt and Radical - a Case Report with Two Original Therapeutic Modifications and Successful Outcome.	Dusilová Sulková, S; Horáček, J; Vykoukalová, E; Šafránek, R; Malá, A; Palička, V	2017	N	Clinical case	Academic Department of Internal Medicine, Charles University, Faculty of Medicine in Hradec Králové, Czech Republic. sulkovas@lfhk.cuni.cz.	No accurate	Acta medica (Hradec Kralove)
28980919	Spontaneous Thyroid Hemorrhage on Chronic Anticoagulation Therapy.	Gunasekaran, K; Rudd, KM; Murthi, S; Kaatz, S; Lone, N	2017	N	Off-target	Department of Internal Medicine, Bassett Medical Center, Cooperstown, NY, USA; Division of Hospital Medicine, Henry Ford Hospital, Detroit, MI, USA.	No accurate	Clinics and practice
27916585	[Autoimmune-related bleeding occurring during combined immunotherapy for lung cancer - Case report].	Eberst, G; Lakhzoum, W; Tomasini, P; Andreotti, N; Abcaya, J; Mascaux, C; Barlesi, F	2018	N	Clinic case	Université d'Aix-Marseille, Assistance publique Hôpitaux de Marseille, centre essais précoces en cancérologie de Marseille CLIP2, hôpital La Timone, boulevard Saint-Pierre, 13005 Marseille, France.	No accurate	Revue des maladies respiratoires
27677669	A case-control study of exposure to organophosphate flame retardants and risk of thyroid cancer in women.	Deziel, NC; Yi, H; Stapleton, HM; Huang, H; Zhao, N; Zhang, Y	2018	N	Flame retardant	Department of Environmental Health Sciences, Yale School of Public Health, 60 College St, New Haven, CT, 06520, USA. nicole.deziel@yale.edu.	No accurate	BMC cancer
	Analysis of endocrine activity in drinking water, surface water and treated wastewater from six countries.	Leusch, FDL; Neale, PA; Arnal, C; Aneck-Hahn, NH; Balaguer, P; Bruchet, A; Escher, BI; Esperanza, M; Grimaldi, M; Leroy, G; Scheurer, M; Schlichting, R; Schriks, M; Hebert, A	2018	N	No thyroid endpoints	Australian Rivers Institute, School of Environment and Science, Griffith University, Southport QLD 4222, Australia. Electronic address: f.leusch@griffith.edu.au.	No accurate	Water research
24878356	Aspirin Increases the Risk of Nondiagnostic Yield of Fine-Needle Aspiration and Biopsy of Thyroid Nodules.	Khan, TS; Sharma, E; Singh, B; Jammu, B; Chadha, A; Markanday, D; Wu, YY; Bajaj, HS	2018	N	Off-target	Division of Endocrinology and Metabolism, McMaster University, Hamilton, Ontario, Canada.	No accurate	European thyroid journal
29674245	Bilateral adrenal hemorrhage in antiphospholipid syndrome. Anticoagulation for the treatment of hemorrhage.	Aldaajani, H; Albahrani, S; Saleh, K; Alghanim, K	2018	N	Off-target	Department of Internal Medicine, King Fahad Military Medical Complex, Dhahran, Kingdom of Saudi Arabia. E-mail. hano.ibrahim@gmail.com.	No accurate	Saudi medical journal
24449421	Characterization and comparison of transcriptional activities of the retinoid X receptors by various organotin compounds in three prosobranch gastropods; Thais clavigera, Nucella lapillus and Babylonia japonica.	Urushitani, H; Katsu, Y; Kagechika, H; Sousa, ACA; Barroso, CM; Ohta, Y; Shiraishi, H; Iguchi, T; Horiguchi, T	2018	N	No thyroid endpoints	Center for Health and Environmental Risk Research, National Institute for Environmental Studies, 16-2 Onogawa, Tsukuba, Ibaraki, 305-8506, Japan.	No accurate	Aquatic toxicology (Amsterdam, Netherlands)
25684042	Compliance with pathology testing guidelines in Australian general practice: protocol for a secondary analysis of electronic health record data.	Sezgin, G; Georgiou, A; Hardie, RA; Li, L; Pont, LG; Badrick, T; Franco, GS; Westbrook, JI; Rinehart, N; McLeod, A; Pearce, C; Shearer, M; Whyte, R; Deveny, E	2018	N	Off-target	Centre for Health Systems and Safety Research, Australian Institute of Health Innovation, Macquarie University, Sydney, New South Wales, Australia.	No accurate	BMJ open
28431984	Do anticoagulation medications increase the risk of haematoma in ultrasound-guided fine needle aspiration of thyroid lesions?	Khadra, H; Kholmatov, R; Monlezun, D; Kandil, E	2018	N	No thyroid endpoints	Division of Endocrine and Oncologic Surgery, Department of Surgery, Tulane University School of Medicine, New Orleans, Louisiana, USA.	No accurate	Cytopathology : official journal of the British Society for Clinical Cytology
30685453	Interaction study between antiplatelet agents, anticoagulants, thyroid replacement therapy and a bioavailable formulation of curcumin (Meriva®).	Hu, S; Belcaro, G; Dugall, M; Peterzan, P; Hosoi, M; Ledda, A; Riva, A; Giacomelli, L; Togni, S; Eggenhoffner, R; Cotellese, R	2018	N	Off-target	Department of Medicine and Biotechnological Sciences Biomedical Science, Irvine 3 Labs, Circulation Sciences, Chieti-Pescara University, Chieti-Pescara, Italy. cardres@abol.it.	No accurate	European review for medical and pharmacological sciences
24626741	Punicalagin induces senescent growth arrest in human papillary thyroid carcinoma BCPAP cells via NF-κB signaling pathway.	Cheng, X; Yao, X; Xu, S; Pan, J; Yu, H; Bao, J; Guan, H; Lu, R; Zhang, L	2018	N	Cancer	Key Laboratory of Nuclear Medicine, Ministry of Health, Jiangsu Key Laboratory of Molecular Nuclear Medicine, Jiangsu Institute of Nuclear Medicine, Wuxi, Jiangsu, China.	No accurate	Biomedicine & pharmacotherapy = Biomedecine & pharmacotherapie
30802040	[Effect of the Metabolic Modification of Environmental Chemicals on Endocrine-disrupting Activity].	Kitamura, S	2018	N	Japanes	Nihon Pharmaceutical University.	No accurate	Yakugaku zasshi : Journal of the Pharmaceutical Society of Japan
30215082	Assessment of endocrine disruption and oxidative potential of bisphenol-A, triclosan, nonylphenol, diethylhexyl phthalate, galaxolide, and carbamazepine, common contaminants of municipal biosolids.	Cavanagh, JE; Trought, K; Mitchell, C; Northcott, G; Tremblay, LA	2018	N	Off-target	Landcare Research, PO Box 40, Lincoln, New Zealand. Electronic address: cavanaghj@landcareresearch.co.nz.	No accurate	Toxicology in vitro : an international journal published in association with BIBRA
24518186	Hygienic assessment of the effects of pesticides application on adult population morbidity with thyroid gland diseases.	Antonenko, AM; Vavrinevych, OP; Korshun, MM; Omelchuk, ST	2018	N	Bad written	Hygiene And Ecology Institute, Bogomolets National Medical University, Kyiv, Ukraine.	No accurate	Wiadomosci lekarskie (Warsaw, Poland : 1960)
25349184	A Toxicogenomic Approach Reveals a Novel Gene Regulatory Network Active in In Vitro and In Vivo Models of Thyroid Carcinogenesis.	Reale, C; Russo, F; Credendino, SC; Cuomo, D; De Vita, G; Mallardo, M; Pennino, F; Porreca, I; Triassi, M; De Felice, M; Ambrosino, C	2019	N	Cancer	IRGS, Biogem, Via Camporeale, 83031 Ariano Irpino, Avellino, Italy. carla.reale@biogem.it.	No accurate	International journal of environmental research and public health
24913218	Effects of DDT and permethrin on rat hepatocytes cultivated in microfluidic biochips: Metabolomics and gene expression study.	Jellali, R; Zeller, P; Gilard, F; Legendre, A; Fleury, MJ; Jacques, S; Tcherkez, G; Leclerc, E	2018	N	No thyroid endpoints	Sorbonne Universités, Université de Technologie de Compiègne, CNRS, UMR 7338, Biomécanique et Bioingénierie, Centre de Recherche Royallieu, CS 60319, 60203, Compiègne Cedex, France. Electronic address: rachid.jellali@utc.fr.	organohalogen	Environmental toxicology and pharmacology
24712661	Polychlorinated biphenyls, indicators of thyroid function and thyroid autoantibodies in the Anniston Community Health Survey I (ACHS-I).	Benson, K; Yang, E; Dutton, N; Sjodin, A; Rosenbaum, PF; Pavuk, M	2018	N	PCBs	Agency for Toxic Substances and Disease Registry (ATSDR), Atlanta, GA, USA. Electronic address: yrn0@cdc.gov.	Organohalogen (organochlorine)	Chemosphere
24892251	Enantioselective thyroid disruption in zebrafish embryo-larvae via exposure to environmental concentrations of the chloroacetamide herbicide acetochlor.	Xu, C; Sun, X; Niu, L; Yang, W; Tu, W; Lu, L; Song, S; Liu, W	2019	N	Not relevant	College of Environment, Zhejiang University of Technology, Hangzhou 310032, China. Electronic address: chaoxu@zjut.edu.cn.	Organohalogen (organochlorine)	The Science of the total environment
24761821	Assessment of concentrations and effects of organohalogen contaminants in a terrestrial passerine, the European starling.	Eng, ML; Williams, TD; Letcher, RJ; Elliott, JE	2014	N	n too small	Department of Biological Sciences, Simon Fraser University, Burnaby, BC V5A 1S6, Canada. Electronic address: mea10@sfu.ca.	organohalogenated pollutants	The Science of the total environment
24830592	Determination of phenolic organohalogens in human serum from a Belgian population and assessment of parameters affecting the human contamination.	Dufour, P; Pirard, C; Charlier, C	2017	N	Pesticide detection test	Laboratory of Clinical, Forensic and Environmental Toxicology, University of Liege (ULg) CHU (B35), 4000, Liege, Belgium; Center for Interdisciplinary Research on Medicines (C.I.R.M.), University of Liege (ULg) CHU (B35), 4000, Liege, Belgium. Electronic address: pdufour@ulg.ac.be.	organohalogens	The Science of the total environment
24604144	Chronic dietary exposure to pesticide residues and associated risk in the French ELFE cohort of pregnant women.	de Gavelle, E; de Lauzon-Guillain, B; Charles, MA; Chevrier, C; Hulin, M; Sirot, V; Merlo, M; Nougadère, A	2016	N	No thyroid endpoints	ANSES - French Agency for Food, Environmental and Occupational Health & Safety, Risk Assessment Department, 14 rue Pierre et Marie Curie, F-94701, Maisons-Alfort Cedex, France. Electronic address: erwan.degavelle@gmail.com.	organophosphate	Environment international
25754167	Investigating endocrine and physiological parameters of captive American kestrels exposed by diet to selected organophosphate flame retardants.	Fernie, KJ; Palace, V; Peters, LE; Basu, N; Letcher, RJ; Karouna-Renier, NK; Schultz, SL; Lazarus, RS; Rattner, BA	2015	N	Flame retardant	‡Stantec Consulting Ltd., 386 Broadway Avenue, Winnipeg, MB, Canada R3C 3R6.	organophosphate	Environmental science & technology
26683953	Thyroid disruption by triphenyl phosphate, an organophosphate flame retardant, in zebrafish (Danio rerio) embryos/larvae, and in GH3 and FRTL-5 cell lines.	Kim, S; Jung, J; Lee, I; Jung, D; Youn, H; Choi, K	2015	N	Flame retardant	School of Public Health, Seoul National University, Seoul 151-742, Republic of Korea.	organophosphate	Aquatic toxicology (Amsterdam, Netherlands)
25905496	Prediction of Endocrine System Affectation in Fisher 344 Rats by Food Intake Exposed with Malathion, Applying Naïve Bayes Classifier and Genetic Algorithms.	Mora, JD; Hurtado, DA; Sandoval, OL	2016	N	Not thyroid endpoints	Department of Mechatronics Engineering, Faculty of Engineering, Nueva Granada Military University, Bogotá, Colombia.	organophosphate	International journal of preventive medicine
25901270	Fenitrothion, an organophosphorous insecticide, impairs locomotory function and alters body temperatures in Sminthopsis macroura (Gould 1845) without reducing metabolic rates during running endurance and thermogenic performance tests.	Story, PG; French, K; Astheimer, LB; Buttemer, WA	2016	N	No thyroid endpoints	Australian Plague Locust Commission, Department of Agriculture, Canberra, Australian Capital Territory, Australia.	organophosphate	Environmental toxicology and chemistry
25680979	Associations between urinary diphenyl phosphate and thyroid function.	Preston, EV; McClean, MD; Claus Henn, B; Stapleton, HM; Braverman, LE; Pearce, EN; Makey, CM; Webster, TF	2017	N	Flame retardant - Plasticer	Department of Environmental Health, Boston University School of Public Health, Boston, MA, USA. Electronic address: ejvirgi@bu.edu.	organophosphate	Environment international
25564013	Organophosphate Ester, 2-Ethylhexyl Diphenyl Phosphate (EHDPP), Elicits Cytotoxic and Transcriptomic Effects in Chicken Embryonic Hepatocytes and Its Biotransformation Profile Compared to Humans.	Shen, J; Zhang, Y; Yu, N; Crump, D; Li, J; Su, H; Letcher, RJ; Su, G	2019	N	Not thyroid endpoints	Jiangsu Key Laboratory of Chemical Pollution Control and Resources Reuse, School of Environmental and Biological Engineering , Nanjing University of Science and Technology , Nanjing 210094 , People's Republic of China.	organophosphate	Environmental science & technology
26666467	Protective role of Nigella sativa oil against reproductive toxicity, hormonal alterations, and oxidative damage induced by chlorpyrifos in male rats.	Mosbah, R; Yousef, MI; Maranghi, F; Mantovani, A	2016	N	Protective effect	Department of Biology, Faculty of Sciences, University of Boumerdes, Algeria.	organophosphate (chlorpyrifos)	Toxicology and industrial health
27482386	Potential protective effect of Pistacia lentiscus oil against chlorpyrifos-induced hormonal changes and oxidative damage in ovaries and thyroid of female rats.	Chebab, S; Mekircha, F; Leghouchi, E	2017	N	Protective effect	Département des sciences biologiques de l'environnement, Faculté des Sciences de la Nature et de la Vie, Université de Bejaia, Bejaia, 06000, Algerie; Laboratoire Biotechnologie, Environnement et Santé, Université de Jijel, Jijel, 18000, Algerie. Electronic address: samira_univjijel@yahoo.fr.	organophosphate (chlorpyrifos)	Biomedicine & pharmacotherapy = Biomedecine & pharmacotherapie
26614792	The effect of chlorpyrifos on salinity acclimation of juvenile rainbow trout (Oncorhynchus mykiss).	Amiri, BM; Xu, EG; Kupsco, A; Giroux, M; Hoseinzadeh, M; Schlenk, D	2018	N	Not thyroid endpoints	Department of Fisheries & Environmental Sciences, Faculty of Natural Resources, University of Tehran, 31585-4314 Karaj, Iran; Department of Environmental Sciences, University of California, Riverside, CA 92521, USA.	organophosphate (chlorpyrifos)	Aquatic toxicology (Amsterdam, Netherlands)
26695107	Molecular and biochemical evidences on the protective effects of triiodothyronine against phosphine-induced cardiac and mitochondrial toxicity	Abdolghaffari, AH; Baghaei, A; Solgi, R; Gooshe, M; Baeeri, M; Navaei-Nigjeh, M; Hassani, S; Jafari, A; Rezayat, SM; Dehpour, AR; Mehr, SE; Abdollahi, M	2015	N	Protective effect	Department of Pharmacology, School of Medicine, International Campus, Tehran University of Medical Sciences (TUMS-IC), 1417653861 Tehran, Iran; Pharmacology and Applied Medicine, Department of Medicinal Plants Research Center, Institute of Medicinal Plants, ACECR, 141554364 Karaj, Iran; Department of Pharmacology, School of Medicine, Tehran University of Medical Sciences, 1417614411 Tehran, Iran;…	phosphines	Life sciences
27499793	Spatiotemporal patterns and relationships among the diet, biochemistry, and exposure to flame retardants in an apex avian predator, the peregrine falcon.	Fernie, KJ; Chabot, D; Champoux, L; Brimble, S; Alaee, M; Marteinson, S; Chen, D; Palace, V; Bird, DM; Letcher, RJ	2017	N	Flame retardant	Ecotoxicology & Wildlife Health Division, Science & Technology Branch, Environment and Climate Change Canada, Burlington, Ontario, Canada. Electronic address: kim.fernie@canada.ca.	polybrominated / organophosphate esters	Environmental research
28261644	The ameliorating effects of vitamin E on hepatic antioxidant system and xenobiotic-metabolizing enzymes in fenvalerate-exposed iodine-deficient rats.	Kocer-Gumusel, B; Erkekoglu, P; Caglayan, A; Hincal, F	2016	N	Protective effect	a Department of Toxicology , Faculty of Pharmacy, Hacettepe University , Ankara , Turkey.	pyrethroids	Drug and chemical toxicology
29016085	Developmental toxicity of kresoxim-methyl during zebrafish (Danio rerio) larval development.	Jiang, J; Lv, L; Wu, S; An, X; Wang, F; Liu, X; Zhao, X	2019	N	High doses	Institute of Quality and Standard for Agro-products, Zhejiang Academy of Agricultural Sciences, State Key Laboratory Breeding Base for Zhejiang Sustainable Pest and Disease Control, Hangzhou, 310021, Zhejiang, China.	strobilurin	Chemosphere
27182616	Probabilistic dietary risk assessment of triazole and dithiocarbamate fungicides for the Brazilian population.	Jardim, ANO; Mello, DC; Brito, AP; van der Voet, H; Boon, PE; Caldas, ED	2018	N	No health effect	Laboratory of Toxicology, Department of Pharmaceutical Sciences, University of Brasilia, Brasilia, DF, Brazil.	triazole and dithiocarbamate	Food and chemical toxicology : an international journal published for the British Industrial Biological Research Association
27872699	Extremely elevated international normalized ratio of warfarin in a patient with CYP2C9*1/*3 and thyrotoxicosis.	Lee, JE; Ryu, DH; Jeong, HJ; Kim, JH; Jun, JE; Kim, JS; Lee, SY	2014	N	Thyrotoxicosis	Department of Medicine, Samsung Medical Center, Sungkyunkwan University School of Medicine, Seoul, Korea.	warfarin	Journal of Korean medical science
27052045	Graves' disease and treatment effects on warfarin anticoagulation.	Howard-Thompson, A; Luckey, A; George, C; Choby, BA; Self, TH	2014	N	Off-target	Department of Clinical Pharmacy and Family Medicine, University of Tennessee Health Science Center, 881 Madison Avenue, Memphis, TN 38163, USA.	warfarin	Case reports in medicine

## Sheet: Removed after second filter
Articles removed after second filter
PMID	Article Title	All Authors (Last, Initials)	Year	Usefull (Y/N)	Reason of removal	Departament	Class	Experimental	Journal
27331295	River otters (Lontra canadensis)“trapped” in a coastal environment contaminated with persistent organic pollutants: Demographic and physiological consequences	Huang, AC; Nelson, C; Elliott, JE; Guertin, DA; Ritland, C; Drouillard, K; Cheng, KM; Schwantje, HM	2018	Y	Mixture (PCBs - dioxins - organochlorine insecticides )	Science & Technology Branch, Environment and Climate Change Canada, Delta, BC, Canada.	Organohalogen (organochlorine)	epi	Environmental pollution (Barking, Essex : 1987)
28612237	The identification of the metabolites of chlorothalonil in zebrafish (Danio rerio) and their embryo toxicity and endocrine effects at environmentally relevant levels.	Zhang, Q; Ji, C; Yan, L; Lu, M; Lu, C; Zhao, M	2016	Y	Low doses	Beijing Advanced Innovation Center for Food Nutrition and Human Health, College of Environment, Zhejiang University of Technology, Hangzhou 310032, China.	Mixture	in vivo	Environmental pollution (Barking, Essex : 1987)
29117154	A nested case-control study of polychlorinated biphenyls, organochlorine pesticides, and thyroid cancer in the Janus Serum Bank cohort.	Lerro, CC; Jones, RR; Langseth, H; Grimsrud, TK; Engel, LS; Sjödin, A; Choo-Wosoba, H; Albert, P; Ward, MH	2018	Y	Cancer	Occupational and Environmental Epidemiology Branch, Division of Cancer Epidemiology and Genetics, National Cancer Institute, Rockville, MD, USA. Electronic address: lerrocc@mail.nih.gov.	Organohalogen (organochlorine)	epi	Environmental research
28941600	Competition and pesticide exposure affect development of invasive (Rhinella marina) and native (Fejervarya vittigera) rice paddy amphibian larvae.	Shuman-Goodier, ME; Singleton, GR; Propper, CR	2017	Y	Herbicide	Department of Biological Sciences, Northern Arizona University, Flagstaff, AZ, 86001, USA. ms2883@nau.edu.	acetanilide		Ecotoxicology (London, England)
28474439	Impact of co-exposure with butachlor and triadimefon on thyroid endocrine system in larval zebrafish.	Cao, C; Wang, Q; Jiao, F; Zhu, G	2016	Y	mixture	Institute of Pesticide and Environmental Toxicology, Zhejiang University, Hangzhou 310058, PR China.	acetanilide / triazol (I would say)		Experimental and toxicologic pathology : official journal of the Gesellschaft fur Toxikologische Pathologie
28250654	Exposure to butachlor causes thyroid endocrine disruption and promotion of metamorphosis in Xenopus laevis.	Li, S; Li, M; Wang, Q; Gui, W; Zhu, G	2016	Y	Pesticide	Institute of Pesticide and Environmental Toxicology, Zhejiang University, Hangzhou, 310058, PR China.	acetanilide		Chemosphere
28976876	Enantioselectivity in Developmental Toxicity of rac-metalaxyl and R-metalaxyl in Zebrafish (Danio rerio) Embryo.	Zhang, Y; Zhang, Y; Chen, A; Zhang, W; Chen, H; Zhang, Q	2016	Y	High dose	College of Biological and Environmental Engineering, Zhejiang University of Technology, Hangzhou, China.	acylalanine		Chirality
28243434	Acute exposure of zebrafish embryo (Danio rerio) to flutolanil reveals its developmental mechanism of toxicity via disrupting the thyroid system and metabolism.	Teng, M; Zhu, W; Wang, D; Yan, J; Qi, S; Song, M; Wang, C	2018	Y	fungicide	College of Sciences, China Agricultural University, Beijing, 100193, China.	amide		Environmental pollution (Barking, Essex : 1987)
30318433	Effects of sublethal Abamectin exposure on some hormonal profiles and testicular histopathology in male albino rats and the possible ameliorative role of Eruca	Hassan, HF; Meligi, NM	2017	Y	Abamectin	Zoology Department, Faculty of Science, Minia University, Minia, 61519, Egypt. hanaafawzy78@mu.edu.eg.	avermectin		Environmental science and pollution research international
29871608	Amphibian (Rana nigromaculata)exposed to cyproconazole: Changes in growth index, behavioral endpoints, antioxidant biomarkers, thyroid and gonad development.	Zhang, W; Chen, L; Xu, Y; Deng, Y; Zhang, L; Qin, Y; Wang, Z; Liu, R; Zhou, Z; Diao, J	2019	Y	Azoles	Beijing Advanced Innovation Center for Food Nutrition and Human Health, Yuanmingyuan West Road 2, Beijing, 100193, China; Department of Applied Chemistry, China Agricultural University, Yuanmingyuan West Road 2, Beijing, 100193, China.	azoles		Aquatic toxicology (Amsterdam, Netherlands)
29621713	Oral and dermal diflubenzuron exposure causes a hypothalamic-pituitary-thyroid (HPT) axis disturbance in the Mongolian racerunner (Eremias argus).	Chang, J; Wang, H; Xu, P; Guo, B; Li, J; Wang, Y; Li, W	2018	Y	pesticide	Research Center for Eco-Environmental Sciences, Chinese Academy of Sciences, Shuangqing RD 18, Beijing, 100085, China; University of Chinese Academy of Sciences, Yuquan RD 19 a, Beijing, 100049, China.	benzoylurea		Environmental pollution (Barking, Essex : 1987)
30023344	Dose-dependent effects of flufenoxuron on thyroid system of mature female lizards (Eremias argus) and their offspring.	Chang, J; Li, W; Xu, P; Guo, B; Wang, H	2019	Y	Target	Research Center for Eco-Environmental Sciences, Chinese Academy of Sciences, Shuangqing RD 18, Beijing 100085, China. Electronic address: jingchang@rcees.ac.cn.	benzoylurea		The Science of the total environment
30106422	Unraveling the different toxic effect of flufenoxuron on the thyroid endocrine system of the Mongolia racerunner (Eremias Argus) at different stages	Chang, J; Li, W; Guo, B; Xu, P; Wang, Y; Li, J; Wang, H	2017	Y	flufenoxuron	Research Center for Eco-Environmental Sciences, Chinese Academy of Sciences, Shuangqing RD 18, Beijing, 100085, China; University of Chinese Academy of Sciences, Yuquan RD 19 A, Beijing, 100049, China.	benzoylurea group		Chemosphere
29621670	Iodine nutritional status and thyroid effects of exposure to ethylenebisdithiocarbamates	Medda, E; Santini, F; De Angelis, S; Franzellin, F; Fiumalbi, C; Perico, A; Gilardi, E; Mechi, MT; Marsili, A; Citroni, A; Leandri, A; Mantovani, A; Vitti, P; Olivieri, A	2017	Y	mancozeb	National Centre for Epidemiology Surveillance and Health Promotion, Italian National Institute of Health, Viale Regina Elena 299, 00161 Rome, Italy.	carbamate (dithiocarbamate)		Environmental research
30429148	Probabilistic cumulative dietary risk assessment of pesticide residues in foods for the German population based on food monitoring data from 2009 to 2014.	Sieke, C	2018	Y	chlorpyrifos - dithiocarbamates	German Federal Institute for Risk Assessment (BfR), Max-Dohrn-Str. 8-10, 10589, Berlin, Germany. Electronic address: Christian.Sieke@bfr.bund.de.	carbamate (dithiocarbamates)		Food and chemical toxicology : an international journal published for the British Industrial Biological Research Association
29969159	Risk assessment of the endocrine-disrupting effects of nine chiral pesticides.	Song, Q; Zhang, Y; Yan, L; Wang, J; Lu, C; Zhang, Q; Zhao, M	2017	Y	Chiral pesticide	Key Laboratory of Microbial Technology for Industrial Pollution Control of Zhejiang Province, College of Environment, Zhejiang University of Technology, Hangzhou, Zhejiang, 310032, China.	chiral		Journal of hazardous materials
30070343	Effect of acetochlor on transcription of genes associated with oxidative stress, apoptosis, immunotoxicity and endocrine disruption in the early life stage of zebrafish.	Jiang, J; Wu, S; Liu, X; Wang, Y; An, X; Cai, L; Zhao, X	2015	Y	acetochlor	Institute of Quality and Standard for Agro-products, Zhejiang Academy of Agricultural Sciences, 198 Shi Qiao Rd, Hangzhou 310021, Zhejiang, PR China. Electronic address: jinhuajiang85@163.com.	chloroacetanilides		Environmental toxicology and pharmacology
29677534	Thyroid endocrine disruption of acetochlor on zebrafish (Danio rerio) larvae.	Yang, M; Hu, J; Li, S; Ma, Y; Gui, W; Zhu, G	2016	Y	Low doses	Institute of Pesticide and Environmental Toxicology, Zhejiang University, Hangzhou, China.	chloroacetanilides		Journal of applied toxicology : JAT
29710015	European demonstration program on the effect-based and chemical identification and monitoring of organic pollutants in European surface waters.	Tousova, Z; Oswald, P; Slobodnik, J; Blaha, L; Muz, M; Hu, M; Brack, W; Krauss, M; Di Paolo, C; Tarcai, Z; Seiler, TB; Hollert, H; Koprivica, S; Ahel, M; Schollée, JE; Hollender, J; Suter, MJ; Hidasi, AO; Schirmer, K; Sonavane, M; Ait-Aissa, S; Creusot, N; Brion, F; Froment, J; Almeida, AC; Thomas, K; Tollefsen, KE; Tufi, S; Ouyang, X; Leonards, P; Lamoree, M; Torrens, VO; Kolkman, A; Schriks, M;…	2017	Y	Complete	Environmental Institute (EI), Okruzna 784/42, 972 41 Kos, Slovak Republic; Masaryk University, Faculty of Science, RECETOX, Kamenice 753/5, 625 00 Brno, Czech Republic.	Compilation		The Science of the total environment
29427707	Assessment of Pesticide Residues in Human Blood and Effects of Occupational Exposure on Hematological and Hormonal Qualities.	Nassar, AMK; Salim, YM; Malhat, FM	2016	Y	Human	Department of Plant Protection, Faculty of Agriculture, Damanhour University, Damanhour, Albeheira 22516, Egypt.	Compilation		Pakistan journal of biological sciences : PJBS
29786585	Exposure to Thyroid-Disrupting Chemicals: A Transatlantic Call for Action.	Leung, AM; Korevaar, TI; Peeters, RP; Zoeller, RT; Köhrle, J; Duntas, LH; Brent, GA; Demeneix, BA	2016	Y	Deep review	1 Division of Endocrinology, UCLA David Geffen School of Medicine , Los Angeles, California.	Compilation		Thyroid : official journal of the American Thyroid Association
30621213	Summary of the development the US Environmental Protection Agency's Medaka Extended One Generation Reproduction Test (MEOGRT) using data from 9 multigenerational medaka tests.	Flynn, K; Lothenbach, D; Whiteman, F; Hammermeister, D; Touart, LW; Swintek, J; Tatarazako, N; Onishi, Y; Iguchi, T; Johnson, R	2017	Y	OECD	Mid-Continent Ecology Division, US Environmental Protection Agency, Duluth, Minnesota.	Compilation		Environmental toxicology and chemistry
26519832	Approaches for grouping of pesticides into cumulative assessment groups for risk assessment of pesticide residues in food	Colnot, T; Dekant, W	2017	Y	Review	CiS Toxicology, Osorno, Chile.	Compilation		Regulatory toxicology and pharmacology : RTP
26747993	Occupational exposure to pesticides and other biocides and risk of thyroid cancer.	Zeng, F; Lerro, C; Lavoué, J; Huang, H; Siemiatycki, J; Zhao, N; Ma, S; Deziel, NC; Friesen, MC; Udelsman, R; Zhang, Y	2017	Y	Biocide	Chongqing Safety Engineering Institute, Chongqing University of Science and Technology, Chongqing, China.	Compilation		Occupational and environmental medicine
28256742	Endocrine Disruption: Current approaches for regulatory testing and assessment of plant protection products are fit for purpose.	Day, P; Green, RM; Gross, M; Weltje, L; Wheeler, JR	2018	Y	Deep review	European Crop Protection Association (ECPA) aisbl, 6 Avenue E. van Nieuwenhuyse, 1160 Brussels, Belgium.	Compilation		Toxicology letters
30664974	Incident thyroid disease in female spouses of private pesticide applicators.	Shrestha, S; Parks, CG; Goldner, WS; Kamel, F; Umbach, DM; Ward, MH; Lerro, CC; Koutros, S; Hofmann, JN; Beane Freeman, LE; Sandler, DP	2018	Y	Human	Epidemiology Branch, National Institute of Environmental Health Sciences, Research Triangle Park, NC, USA.	Compilation		Environment international
29477483	Pesticide Exposure and Stunting among Children in Agricultural Areas.	Kartini, A; Subagio, HW; Hadisaputro, S; Kartasurya, MI; Suhartono, S; Budiyono, B	2019	Y	Human	Department of Public Health Nutrition, Faculty of Public Health, Diponegoro University, Semarang, Indonesia.	Compilation		The international journal of occupational and environmental medicine
28454037	Occupational exposure to pesticides and thyroid function in Brazilian soybean farmers.	Bernieri, T; Rodrigues, D; Barbosa, IR; Ardenghi, PG; Basso da Silva, L	2019	Y	Deep review	Department of Health Sciences, Feevale University, ERS-239, 2755, Zip Code: 93525-075, Novo Hamburgo, Rio Grande do Sul, Brazil.	Compilation		Chemosphere
	Persistent organic pollutants and organophosphate esters in feathers and blood plasma of adult kittiwakes (Rissa tridactyla) from Svalbard - associations with body condition and thyroid hormones.	Svendsen, NB; Herzke, D; Harju, M; Bech, C; Gabrielsen, GW; Jaspers, VLB	2018	Y	POPs	Department of Biology, Norwegian University of Science and Technology (NTNU), NO-7491 Trondheim, Norway. Electronic address: nbos@niras.dk.	Compilation (Persistent organic pollutants)		Environmental research
30609499	Exposure to non-persistent pesticides and thyroid function: A systematic review of epidemiological evidence.	Campos, É; Freire, C	2016	Y	Non-persistant	National School of Public Health, Oswaldo Cruz Foundation (FIOCRUZ), Rio de Janeiro, Brazil. Electronic address: elidacamp@hotmail.com.	Compilation (non-persistant)		International journal of hygiene and environmental health
25463847	Risk assessment of a formamidine pesticide, Amitraz, focusing on thyroid hormone receptors (TRs) in rainbow trout, Oncorhynchus mykiss.	Meriç Turgut, I; Keskin, E	2017	Y	Amitraz	Faculty of Agriculture, Department of Fisheries and Aquaculture Engineering, Ankara University, Dişkapi, Ankara, Turkey.	formamidine		Cellular and molecular biology (Noisy-le-Grand, France)
28554005	Perinatal exposure to glyphosate-based herbicide alters the thyrotrophic axis and causes thyroidhormone homeostasis imbalance in male rats.	de Souza, JS; Kizys, MM; da Conceição, RR; Glebocki, G; Romano, RM; Ortiga-Carvalho, TM; Giannocco, G; da Silva, ID; Dias da Silva, MR; Romano, MA; Chiamolera, MI	2017	Y	Gliphosate	Universidade Federal de São Paulo, Unifesp/EPM, Departamento de Medicina, Disciplina de Endocrinologia Clínica, Laboratório de Endocrinologia Molecular e Translacional (LEMT), São Paulo, Brazil.	Gliphosate-based		Toxicology
30570004	Effects of glyphosate-based herbicides on survival, development, growth and sex ratios of wood frogs (Lithobates sylvaticus) tadpoles. I: chronic laboratory exposures to VisionMax®.	Navarro-Martín, L; Lanctôt, C; Jackman, P; Park, BJ; Doe, K; Pauli, BD; Trudeau, VL	2014	Y	High dose	Centre for Advanced Research in Environmental Genomics (CAREG), Department of Biology, University of Ottawa, Ottawa, ON K1N 6N5, Canada. Electronic address: laianavarromartin@gmail.com.	Glyphosate-based		Aquatic toxicology (Amsterdam, Netherlands)
29268174	Effects of multiple life stage exposure to the fungicide prochloraz in Xenopus laevis: Manifestations of antiandrogenic and other modes of toxicity.	Haselman, JT; Kosian, PA; Korte, JJ; Olmstead, AW; Degitz, SJ	2018	Y	Prochloraz	US EPA Mid-Continent Ecology Division, 6201 Congdon Blvd, Duluth, MN, 55804, USA. Electronic address: haselman.jon@epa.gov.	imidazole		Aquatic toxicology (Amsterdam, Netherlands)
30759554	Ioxynil and tetrabromobisphenol A suppress thyroid-hormone-induced activation of transcriptional elongation mediated by histone modifications and RNA polymerase II phosphorylation.	Otsuka, S; Ishihara, A; Yamauchi, K	2014	Y	Mixture	Department of Biological Science, Graduate School of Science, Shizuoka University, Shizuoka 422-8529, Japan.	Mixture		Toxicological sciences : an official journal of the Society of Toxicology
28624628	Effects of currently used pesticides and their mixtures on the function of thyroid hormone and aryl hydrocarbon receptor in cell culture.	Ghisari, M; Long, M; Tabbo, A; Bonefeld-Jørgensen, EC	2015	Y	Mixture	Centre for Arctic Health & Unit of Cellular and Molecular Toxicology, Department of Public Health, Aarhus University, Aarhus, Denmark.	Mixture		Toxicology and applied pharmacology
29316515	Thyroid disrupting pesticides impair the hypothalamic-pituitary-testicular axis of a wildlife bird, Amandava amandava.	Mohanty, B; Pandey, SP; Tsutsui, K	2017	Y	Mixtures (mancozeb - imidacloprid)	Department of Zoology, University of Allahabad, Allahabad, India. Electronic address: drbana_mohanty@rediffmail.com.	Mixture		Reproductive toxicology (Elmsford, N.Y.)
29579638	Ioxynil and diethylstilbestrol disrupt vascular and heart development in zebrafish.	Li, YF; Canário, AVM; Power, DM; Campinho, MA	2019	Y	Mixture	International Research Centre for Marine Biosciences, Ministry of Science and Technology, Shanghai Ocean University, Shanghai, China; Key Laboratory of Exploration and Utilization of Aquatic Genetic Resources, Ministry of Education, Shanghai Ocean University, Shanghai, China; National Demonstration Center for Experimental Fisheries Science Education, Shanghai Ocean University, Shanghai, China; Ce…	Mixture		Environment international
24394368	Snapping Turtles (Chelydra serpentina) from Canadian Areas of Concern across the southern Laurentian Great Lakes: Chlorinated and brominated hydrocarbon contaminants and metabolites in relation to circulating concentrations of thyroxine and vitamin A.	Letcher, RJ; Lu, Z; de Solla, SR; Sandau, CD; Fernie, KJ	2015	Y	reptiles	Ecotoxicology and Wildlife Health Division, Science and Technology Branch, Environment Canada, National Wildlife Research Centre, Carleton University, Ottawa, Ontario, Canada K1A 0H3. Electronic address: robert.letcher@ec.gc.ca.	organohalogen		Environmental research
30346759	Associations between organohalogen concentrations and transcription of thyroid-related genes in a highly contaminated gull population.	Técher, R; Houde, M; Verreault, J	2016	Y	Target	Centre de recherche en toxicologie de l'environnement (TOXEN), Département des sciences biologiques, Université du Québec à Montréal, C.P. 8888, Succursale Centre-ville, Montreal, QC H3C 3P8, Canada. Electronic address: techer.romy@courrier.uqam.ca.	organohalogen		The Science of the total environment
28545212	Halogenated phenolic compounds in wild fish from Canadian Areas of Concern.	Gilroy, ÈAM; Muir, DCG; McMaster, ME; Darling, C; Campbell, LM; Alaee, M; Brown, SB; Sherry, JP	2017	Y	Pesticide detection essay	Green House Science, Burlington, Ontario, Canada.	organohalogen		Environmental toxicology and chemistry
	Prenatal exposure to organohalogen compounds and children's mental and motor development at 18 and 30 months of age.	Ruel, MVM; Bos, AF; Soechitram, SD; Meijer, L; Sauer, PJJ; Berghuis, SA	2019	Y	No thyroid endpoints	Division of Neonatology, Department of Pediatrics, Beatrix Children's Hospital, University of Groningen, University Medical Center Groningen, Groningen, the Netherlands.	Organohalogen		Neurotoxicology
27187793	Agricultural expansion as risk to endangered wildlife: Pesticide exposure in wild chimpanzees and baboons displaying facial dysplasia.	Krief, S; Berny, P; Gumisiriza, F; Gross, R; Demeneix, B; Fini, JB; Chapman, CA; Chapman, LJ; Seguya, A; Wasswa, J	2017	Y	DDT	UMR 7206 CNRS/MNHN/P7, Eco-anthropologie et ethnobiologie, Hommes, et Environnements, Museum national d'Histoire naturelle, Musée de l'Homme, 17 place du Trocadéro, 75016 Paris, France; Great Ape Conservation Project (GACP), Sebitoli Research Station, Kibale National Park, Fort Portal, Uganda. Electronic address: sabrina.krief@mnhn.fr.	organohalogen		The Science of the total environment
25988605	The endocrine-disrupting potential of four chlorophenols by in vitro and in silico assay.	Yu, C; Wang, C; Lu, Z; Zhang, C; Dai, W; Yu, S; Lin, S; Zhang, Q	2019	Y	In vitro - In silico	Key Laboratory of Microbial Technology for Industrial Pollution Control of Zhejiang Province, College of Environment, Zhejiang University of Technology, Hangzhou, Zhejiang, 310032, China.	Organohalogen (organochlorine)		Chemosphere
25646720	Relative developmental toxicities of pentachloroanisole and pentachlorophenol in a zebrafish model (Danio rerio).	Cheng, Y; Ekker, M; Chan, HM	2015	Y	Target	Center for Advanced Research in Environmental Genomics, University of Ottawa, 30 Marie Curie, Ottawa, ON, Canada K1N 6N5.	Organohalogen (organochlorine)		Ecotoxicology and environmental safety
27833725	Contaminants and energy expenditure in an Arctic seabird: Organochlorine pesticides and perfluoroalkyl substances are associated with metabolic rate in a contrasted manner.	Blévin, P; Tartu, S; Ellis, HI; Chastel, O; Bustamante, P; Parenteau, C; Herzke, D; Angelier, F; Gabrielsen, GW	2017	Y	organochlorines (OCs), perfluoroalkyl substances (PFASs), and mercury)	Centre d'Etudes Biologiques de Chizé (CEBC), UMR 7372 - CNRS & Université de la Rochelle, 79360 Villiers-en-Bois, France. Electronic address: blevin.pierre@gmail.com.	Organohalogen (organochlorine)		Environmental research
26184692	[Pesticides and hypothyroidism in farmers of plantain and coffee growing areas in Quindio, Colombia].	Londoño, ÁL; Restrepo, B; Sánchez, JF; García-Ríos, A; Bayona, A; Landázuri, P	2018	Y	pesticides hypothrioidism	AL: MD. Ph. D. Medicina Preventiva y Salud Pública. Esp. Epidemiología. Facultad de Ciencias de la Salud, Universidad del Quindío. Armenia, Colombia. angelalilianal@uniquindio.edu.co.	Organohalogen (organochlorine)		Revista de salud publica (Bogota, Colombia)
28162782	Time-dependent inhibitory effects of Tris(1, 3-dichloro-2-propyl) phosphate on growth and transcription of genes involved in the GH/IGF axis, but not the HPT axis, in female zebrafish.	Zhu, Y; Su, G; Yang, D; Zhang, Y; Yu, L; Li, Y; Giesy, JP; Letcher, RJ; Liu, C	2017	Y	No effect	College of Fisheries, Huazhong Agricultural University, Wuhan 430070, China.	Organohalogen (organochlorine)		Environmental pollution (Barking, Essex : 1987)
30652482	The body burden and thyroid disruption in lizards (Eremias argus) living in benzoylurea pesticides-contaminated soil.	Chang, J; Li, J; Hao, W; Wang, H; Li, W; Guo, B; Li, J; Wang, Y; Xu, P	2018	Y	Dermal effect	Research Center for Eco-Environmental Sciences, Chinese Academy of Sciences, Shuangqing RD 18, Beijing, 100085, China; University of Chinese Academy of Sciences, Yuquan RD 19A, Beijing, 100049, China.	Organohalogen (organochlorine)		Journal of hazardous materials
24998971	Association between organohalogenated pollutants in cord blood and thyroid function in newborns and mothers from Belgian population.	Dufour, P; Pirard, C; Seghaye, MC; Charlier, C	2018	Y	organohalogenated pollutants	Laboratory of Clinical, Forensic and Environmental Toxicology, University of Liege (ULg), CHU (B35), 4000, Liege, Belgium; Center for Interdisciplinary Research on Medicines (C.I.R.M.), University of Liege (ULg), CHU (B35), 4000, Liege, Belgium. Electronic address: pdufour@ulg.ac.be.	organohalogenated pollutants		Environmental pollution (Barking, Essex : 1987)
25826601	Metabolism of Diflubenzuron in Lizard ( Eremias argus) and Comparative Toxicity of Diflubenzuron and Its Metabolite.	Wang, H; Xie, Y; Jiao, M; Hu, X; Li, J; Xu, P; Zhang, Y; Chang, J	2018	Y	diflubenzuron	Research Center for Eco-Environmental Sciences , Chinese Academy of Sciences , Shuangqing RD 18 , Beijing 100085 , China.	organohalogenated pollutants		Journal of agricultural and food chemistry
26356387	Tris(2-butoxyethyl)phosphate and triethyl phosphate alter embryonic development, hepatic mRNA expression, thyroid hormone levels, and circulating bile acid concentrations in chicken embryos.	Egloff, C; Crump, D; Porter, E; Williams, KL; Letcher, RJ; Gauthier, LT; Kennedy, SW	2014	Y	Target	National Wildlife Research Centre, Environment Canada, Ottawa, ON K1A 0H3, Canada.	organophosphate		Toxicology and applied pharmacology
26562049	Bioconcentration and transfer of the organophorous flame retardant 1,3-dichloro-2-propyl phosphate causes thyroid endocrine disruption and developmental neurotoxicity in zebrafish larvae.	Wang, Q; Lai, NL; Wang, X; Guo, Y; Lam, PK; Lam, JC; Zhou, B	2015	Y	Transfer offspring	†State Key Laboratory of Freshwater Ecology and Biotechnology, Institute of Hydrobiology, Chinese Academy of Sciences, Wuhan, Hubei 430072, China.	Organophosphate		Environmental science & technology
25855011	Bioconcentration, metabolism and alterations of thyroid hormones of Tris(1,3-dichloro-2-propyl) phosphate (TDCPP) in Zebrafish.	Xu, T; Wang, Q; Shi, Q; Fang, Q; Guo, Y; Zhou, B	2015	Y	Target	Puai Hospital, Huazhong University of Science and Technology, Wuhan 430033, China.	organophosphate		Environmental toxicology and pharmacology
26547027	Differential modulation of expression of nuclear receptor mediated genes by tris(2-butoxyethyl) phosphate (TBOEP) on early life stages of zebrafish (Danio rerio).	Ma, Z; Yu, Y; Tang, S; Liu, H; Su, G; Xie, Y; Giesy, JP; Hecker, M; Yu, H	2015	Y	Pesticide substitute	State Key Laboratory of Pollution Control and Resource Reuse, School of the Environment, Nanjing University, Nanjing, Jiangsu 210023, China. Electronic address: zhiyuan_nju@163.com.	organophosphate		Aquatic toxicology (Amsterdam, Netherlands)
26865342	Effects of chlorpyrifos on in vitro sex steroid production and thyroid follicular development in adult and larval Lake Sturgeon, Acipenser fulvescens.	Brandt, C; Burnett, DC; Arcinas, L; Palace, V; Gary Anderson, W	2015	Y	No effect	Department of Biological Sciences, 150 Sifton Road, University of Manitoba, Winnipeg, MB R3T 2N2, Canada; North/South Consultants Inc., 83 Scurfield Boulevard, Winnipeg R3Y 1G4, Canada.	organophosphate		Chemosphere
27562511	Effects of tris (2-butoxyethyl) phosphate (TBOEP) on endocrine axes during development of early life stages of zebrafish (Danio rerio).	Ma, Z; Tang, S; Su, G; Miao, Y; Liu, H; Xie, Y; Giesy, JP; Saunders, DM; Hecker, M; Yu, H	2016	Y	Target	State Key Laboratory of Pollution Control and Resource Reuse, School of the Environment, Nanjing University, Nanjing, 210023, China.	Organophosphate		Chemosphere
27905040	Long-term exposure to triphenylphosphate alters hormone balance and HPG, HPI, and HPT gene expression in zebrafish (Danio rerio).	Liu, X; Jung, D; Jo, A; Ji, K; Moon, HB; Choi, K	2016	Y	Target	School of Public Health, Seoul National University, Seoul, Republic of Korea.	organophosphate		Environmental toxicology and chemistry
27838902	Taurine ameliorated thyroid function in rats co-administered with chlorpyrifos and lead.	Akande, MG; Shittu, M; Uchendu, C; Yaqub, LS	2016	Y	Protective effect	Department of Veterinary Pharmacology and Toxicology, Faculty of Veterinary Medicine, University of Abuja, Abuja, Federal Capital Territory, 900001, Nigeria. akande.ganiyat@uniabuja.edu.ng.	organophosphate		Veterinary research communications
30149310	Morphofunctional Changes in the Thyroid Gland of Pubertal and Postpubertal Rats Exposed to Low Dose of DDT.	Yaglova, NV; Sledneva, YP; Yaglov, VV	2016	Y	DDT	Research Institute of Human Morphology, Moscow, Russia. yaglova@mail.ru.	organophosphate		Bulletin of experimental biology and medicine
30508752	Association between thyroid function and urinary levels of 3,5,6-trichloro-2-pyridinol: data from NHANES 2007-2008.	Jain, RB	2017	Y	Insecticide - Human	, 2959 Estate View Court, Dacula, GA, 30019, USA. Jain.ram.b@gmail.com.	organophosphate		Environmental science and pollution research international
25425536	Effects of environmentally relevant concentrations of tris (2-butoxyethyl) phosphate on growth and transcription of genes involved in the GH/IGF and HPT axes in zebrafish (Danio rerio).	Zeng, X; Sun, H; Huang, Y; Liu, J; Yu, L; Liu, C; Wang, J	2018	Y	Chemosphere	College of Fisheries, Huazhong Agricultural University, Wuhan 430070, China.	organophosphate		Chemosphere
29217167	Effects of tris(1,3-dichloro-2-propyl) phosphate (TDCPP) and triphenyl phosphate (TPP) on sex-dependent alterations of thyroid hormones in adult zebrafish.	Liu, X; Cai, Y; Wang, Y; Xu, S; Ji, K; Choi, K	2019	Y	Target	School of Public Health, Dongguan Key Laboratory of Environmental Medicine, Guangdong Medical University, Guangdong 523-808, China.	Organophosphate		Ecotoxicology and environmental safety
29304407	In vitro assessment of thyroid hormone receptor activity of four organophosphate esters.	Ren, X; Cao, L; Yang, Y; Wan, B; Wang, S; Guo, L	2016	Y	Molecular docking	State Key Laboratory of Environmental Chemistry and Eco-toxicology, Research Centre for Eco-environmental Sciences, Chinese Academy of Sciences, Beijing 100085, China. Electronic address: xmren@rcees.ac.cn.	organophosphate esters.		Journal of environmental sciences (China)
27372132	Morbidity in New Zealand pesticide producers exposed to 2,3,7,8-tetrachlorodibenzo-p-dioxin (TCDD).	't Mannetje, A; Eng, A; Walls, C; Dryson, E; Douwes, J; Bertazzi, P; Ryder-Lewis, S; Scott, D; Brooks, C; McLean, D; Cheng, S; Pearce, N	2018	Y	2,3,7,8-tetrachlorodibenzo-p-dioxin	Centre for Public Health Research, Massey University, PO Box 756, Wellington 6021, New Zealand. Electronic address: a.mannetje@massey.ac.nz.	Organophosphate pesticide		Environment international
29031942	Organophosphate triesters and selected metabolites enhance binding of thyroxine to human transthyretin in vitro.	Hill, KL; Hamers, T; Kamstra, JH; Willmore, WG; Letcher, RJ	2018	Y	Mode of action	Ecotoxicology and Wildlife Health Division, Environment and Climate Change Canada, National Wildlife Research Centre, Carleton University, Ottawa, Canada; Department of Biology, Carleton University, Ottawa, Canada; Intrinsik Corp., Ottawa, Canada.	Organophosphate triesters		Toxicology letters
29306024	Endocrine actions of pesticides measured in the Flemish environment and health studies (FLEHS I and II).	Croes, K; Den Hond, E; Bruckers, L; Govarts, E; Schoeters, G; Covaci, A; Loots, I; Morrens, B; Nelen, V; Sioen, I; Van Larebeke, N; Baeyens, W	2015	Y	Really interesting	Department of Analytical, Environmental and Geo-Chemistry (AMGC), Vrije Universiteit Brussel, Pleinlaan 2, 1050, Brussels, Belgium. kim.croes@vub.ac.be.	organophosphorus		Environmental science and pollution research international
25138556	Population and life-stage-specific effects of two herbicide formulations on the aquatic development of European common frogs (Rana temporaria).	Wagner, N; Veith, M; Lötters, S; Viertel, B	2017	Y	Low to high doses	Trier University, Department of Biogeography, Trier, Germany.	organophosphorus		Environmental toxicology and chemistry
27291460	Development and Characterization of a Human Reporter Cell Line for the Assessment of Thyroid Receptor Transcriptional Activity: A Case of Organotin Endocrine Disruptors.	Illés, P; Brtko, J; Dvořák, Z	2015	Y	Reporter line	†Department of Cell Biology and Genetics, Faculty of Science, Palacky University, Slechtitelu 11, 783 71 Olomouc, Czech Republic.	organotin		Journal of agricultural and food chemistry
26208032	Thyroid endocrine disruption of azocyclotin to Xenopus laevis during metamorphosis.	Li, M; Cao, C; Li, S; Gui, W; Zhu, G	2016	Y	Complete	Institute of Pesticide and Environmental Toxicology, Zhejiang University, Hangzhou 310058, PR China.	Organotin compounds		Environmental toxicology and pharmacology
26970056	Tributyltin disrupts feeding and energy metabolism in the goldfish (Carassius auratus).	Zhang, J; Sun, P; Yang, F; Kong, T; Zhang, R	2016	Y	Thyroid metabolism	Henan Open Laboratory of Key Subjects of Environmental and Animal Products Safety, College of Animal Science and Technology, Henan University of Science and Technology, Henan, China. Electronic address: jiliang_zhang@126.com.	organotin compounds		Chemosphere
26971175	Frontiers in endocrine disruption: Impacts of organotin on the hypothalamus-pituitary-thyroid axis.	Santos-Silva, AP; Andrade, MN; Pereira-Rodrigues, P; Paiva-Melo, FD; Soares, P; Graceli, JB; Dias, GRM; Ferreira, ACF; de Carvalho, DP; Miranda-Alves, L	2018	Y	Tributyltin (TBT)	Grupo de Pesquisa, Desenvolvimento e Inovação em Endocrinologia Experimental-GPDIEEx, Instituto de Ciências Biomédicas, Universidade Federal do Rio de Janeiro, Brazil; Pós-graduação em Endocrinologia, Faculdade de Medicina, Universidade Federal do Rio de Janeiro, Brazil; Laboratório de Fisiologia Endócrina Doris Rosenthal, Instituto de Biofísica Carlos Chagas Filho, Universidade Federal do Rio de…	Orgatonin		Molecular and cellular endocrinology
28774778	Using short-term bioassays to evaluate the endocrine disrupting capacity of the pesticides linuron and fenoxycarb.	Spirhanzlova, P; De Groef, B; Nicholson, FE; Grommen, SVH; Marras, G; Sébillot, A; Demeneix, BA; Pallud-Mothré, S; Lemkine, GF; Tindall, AJ; Du Pasquier, D	2017	Y	fenoxycarb and linuron	Laboratoire WatchFrog S.A., 1 Rue Pierre Fontaine, 91000 Évry, France; UMR CNRS 5166, Evolution des Régulations Endocriniennes, Department of Regulation, Development and Molecular Diversity, Muséum National d'Histoire Naturelle, Paris, France.	phenyl-urea / carbamate		Comparative biochemistry and physiology. Toxicology & pharmacology : CBP
28634053	Variability in the levels of 3-phenoxybenzoic acid (3BPA) by age, gender, and race/ethnicity for the period of 2001-2002 versus 2009-2010 and its association with thyroid function among general US population.	Jain, RB	2016	Y	Human	, 2959 Estate View Court, Dacula, GA, 30019, USA. Jain.ram.b@gmail.com.	pyrethroid		Environmental science and pollution research international
26239436	Toxic effects of Lambda-cyhalothrin, on the rat thyroid: Involvement of oxidative stress and ameliorative effect of ginger extract.	Al-Amoudi, WM	2018	Y	Protective effect	Department of Biology, Faculty of Applied Sciences, Umm Al-Qura University, Makkah 21955, Saudi Arabia.	pyrethroid synthetic		Toxicology reports
28599194	Inhibition effect of cypermethrin mediated by co-regulators SRC-1 and SMRT in interleukin-6-induced androgen receptor activation.	Wang, Q; Zhou, JL; Wang, H; Ju, Q; Ding, Z; Zhou, XL; Ge, X; Shi, QM; Pan, C; Zhang, JP; Zhang, MR; Yu, HM; Xu, LC	2016	Y	cypermethrin	School of Public Health, Xuzhou Medical College, 209 Tong-Shan Road, Xuzhou, Jiangsu, 221002, China.	pyrethroids		Chemosphere
26676543	Trialkyltin Rexinoid-X Receptor Agonists Selectively Potentiate Thyroid Hormone Induced Programs of Xenopus laevis Metamorphosis.	Mengeling, BJ; Murk, AJ; Furlow, JD	2016	Y	RXR interaction	Department of Neurobiology, Physiology and Behavior (B.J.M., J.D.F.), University of California Davis, Davis, California 95695; and Marine Animal Ecology Group (A.J.M.), Wageningen University, 6700 AH Wageningen, The Netherlands.	trialkyltins		Endocrinology
29922588	Embryonic Atrazine Exposure Elicits Alterations in Genes Associated with Neuroendocrine Function in Adult Male Zebrafish.	Wirbisky, SE; Sepúlveda, MS; Weber, GJ; Jannasch, AS; Horzmann, KA; Freeman, JL	2016	Y	atrazine	*School of Health Sciences, Purdue University, Indiana 47907.	triazine		Toxicological sciences : an official journal of the Society of Toxicology
26446907	Chronic toxicity of 1,3,5-triazine herbicides in the postembryonic development of the western clawed frog Silurana tropicalis.	Saka, M; Tada, N; Kamata, Y	2018	Y	Herbicides (ametryn, prometryn, dimethametryn, simazine, atrazine, propazine, and cyanazine)	Division of Aquatic Environment, Kyoto Prefectural Institute of Public Health and Environment, Murakamicho 395, Fushimi-ku, Kyoto 612-8369, Japan. Electronic address: m-saka66@pref.kyoto.lg.jp.	triazine		Ecotoxicology and environmental safety
27239967	Exposure to difenoconazole causes changes of thyroid hormone and gene expression levels in zebrafish larvae.	Liang, X; Yu, L; Gui, W; Zhu, G	2015	Y	Fungicide	Institute of Pesticide and Environmental Toxicology, Zhejiang University, Hangzhou 310058, PR China. Electronic address: liangxiaozju@126.com.	Triazol		Environmental toxicology and pharmacology
30553212	[The change of cancer-related genes expression profile in Nthy-ori-3-1 cell induced by the pesticide amitrole].	Pan, H; Xuan, Q; Han, D; Yin, J; Wu, S; Wang, Q	2016	Y	amitrole gene expression	School of Public Health, Department of Nutrition and Food Science, Kunming Medical University, Kunming 650500, China.	triazole-derivative		Wei sheng yan jiu = Journal of hygiene research
27167774	A predictive data-driven framework for endocrine prioritization: a triazole fungicide case study	Paul Friedman, K; Papineni, S; Marty, MS; Yi, KD; Goetz, AK; Rasoulpour, RJ; Kwiatkowski, P; Wolf, DC; Blacker, AM; Peffer, RC	2016	Y	fungicide	a Human Safety, Bayer CropScience LP, Research Triangle Park , NC , USA ;	triazole-derivative		Critical reviews in toxicology
27413107	Waterborne exposure to triadimefon causes thyroid endocrine disruption and developmental delay in Xenopus laevis tadpoles	Li, M; Li, S; Yao, T; Zhao, R; Wang, Q; Zhu, G	2016	Y	Triadimefon	Institute of Pesticide and Environmental Toxicology, Zhejiang University, Hangzhou 310058, PR China.	triazole-derivative		Aquatic toxicology (Amsterdam, Netherlands)
28869887	Joint toxic effects of triazophos and imidacloprid on zebrafish (Danio rerio).	Wu, S; Li, X; Liu, X; Yang, G; An, X; Wang, Q; Wang, Y	2018	Y	Mixture	State Key Laboratory Breeding Base for Zhejiang Sustainable Pest and Disease Control, Key Laboratory for Pesticide Residue Detection of Ministry of Agriculture, Laboratory (Hangzhou) for Risk Assessment of Agricultural Products of Ministry of Agriculture, Institute of Quality and Standard for Agro-products, Zhejiang Academy of Agricultural Sciences, Hangzhou 310021, Zhejiang, China.	triazophos : organophosphate - imidacloprid: neonicotinoid		Environmental pollution (Barking, Essex : 1987)
30114734	The effect of Tributyltin on thyroid follicular cells of adult male albino rats and the possible protective role of green tea: a toxicological, histological and biochemical study.	Badr El Dine, FMM; Nabil, IM; Dwedar, FI	2017	Y	Protective effects	Departments of Forensic Medicine and Clinical Toxicology, Faculty of Medicine, Alexandria University, Champollion Street, El- Khartoum Square, Azarita Medical Campus, Alexandria, Egypt.	Tributyltin		Egyptian journal of forensic sciences
26590868	RXR Ligands Modulate Thyroid Hormone Signaling Competence in Young Xenopus laevis Tadpoles.	Mengeling, BJ; Goodson, ML; Furlow, JD	2018	Y	RXR interaction	Department of Neurobiology, Physiology and Behavior, College of Biological Sciences, University of California, Davis, Davis, California.	tributyltin		Endocrinology
29554609	The environmental contaminant tributyltin leads to abnormalities in different levels of the hypothalamus-pituitary-thyroid axis in female rats.	Andrade, MN; Santos-Silva, AP; Rodrigues-Pereira, P; Paiva-Melo, FD; de Lima Junior, NC; Teixeira, MP; Soares, P; Dias, GRM; Graceli, JB; de Carvalho, DP; Ferreira, ACF; Miranda-Alves, L	2018	Y	RXR interaction	Grupo de Pesquisa, Desenvolvimento e Inovação em Endocrinologia Experimental-GPDIEEx, Instituto de Ciências Biomédicas, Universidade Federal do Rio de Janeiro, Brazil; Programa de Pós-graduação em Endocrinologia, Faculdade de Medicina, Universidade Federal do Rio de Janeiro, Brazil; Programa de Pós-graduação em Farmacologia e Química Medicinal, Instituto de Ciências Biomédicas, Universidade Feder…	tributyltin		Environmental pollution (Barking, Essex : 1987)
29733884	Disruption of thyroid hormone functions by low dose exposure of tributyltin: an in vitro and in vivo approach.	Sharan, S; Nikhil, K; Roy, P	2014	Y	pesticide	Molecular Endocrinology Laboratory, Department of Biotechnology, Indian Institute of Technology Roorkee, Roorkee 247 667, Uttarakhand, India.	trioorganotins		General and comparative endocrinology
29903322	Pronamide: Weight of evidence for potential estrogen, androgen or thyroid effects.	Marty, MS; Papineni, S; Coady, KK; Rasoulpour, RJ; Pottenger, LH; Eisenbrandt, DL	2015	Y	pronamide	The Dow Chemical Company, Midland, MI, USA. Electronic address: mmarty@dow.com.	benzamides		Regulatory toxicology and pharmacology : RTP
27347635	Butachlor causes disruption of HPG and HPT axes in adult female rare minnow (Gobiocypris rarus)	Zhu, L; Li, W; Zha, J; Wang, M; Yuan, L; Wang, Z	2014	Y	herbicide environmental relevant concentrations (0, 0.1, 1, and 10μg/L) for 40days	State Key Laboratory of Environmental Aquatic Chemistry, Research Center for Eco-Environmental Sciences, Chinese Academy of Sciences, P.O. Box 2871, Beijing 100085, China; Beijing Fishery Research Institute, Beijing 100068, China.	chloroacetamide		Chemico-biological interactions
27289584	Editor's Highlight: Structure-Based Investigation on the Binding and Activation of Typical Pesticides With Thyroid Receptor.	Xiang, D; Han, J; Yao, T; Wang, Q; Zhou, B; Mohamed, AD; Zhu, G	2017	Y	Different dose range	Institute of Pesticide and Environmental Toxicology, Zhejiang University, Hangzhou 310058, P.R. China.	Compilation		Toxicological sciences : an official journal of the Society of Toxicology
29316522	Metabonomic analysis of the joint toxic action of long-term low-level exposure to a mixture of four organophosphate pesticidesin rat plasma.	Du, L; Li, S; Qi, L; Hou, Y; Zeng, Y; Xu, W; Wang, H; Zhao, X; Sun, C	2014	Y	Mixture	Department of Nutrition and Food Hygiene, Public Health College, Harbin Medical University, 194 Xuefu Road, Harbin, Heilongjiang, China 150081. xiujuan_zhao@sina.com sun2002changhao@126.com.	Mixture		Molecular bioSystems
28781899	Changes in thyroid status of Menidia beryllina exposed to the antifouling booster irgarol: Impacts of temperature and salinity.	Moreira, LB; Diamante, G; Giroux, M; Xu, EG; Abessa, DMS; Schlenk, D	2018	Y	Irgarol	Institute of Biosciences, São Paulo State University, São Vicente, SP, Brazil; Department of Environmental Sciences, University of California Riverside, Riverside, CA, USA. Electronic address: lburuaem@gmail.com.	triazine		Chemosphere
29762675	Comparison of triadimefon and its metabolite on acute toxicity and chronic effects during the early development of Rana nigromaculata tadpoles.	Zhang, W; Lu, Y; Huang, L; Cheng, C; Di, S; Chen, L; Zhou, Z; Diao, J	2018	Y	low to high dose	Beijing Advanced Innovation Center for Food Nutrition and Human Health, Yuanmingyuan West Road 2, Beijing 100193, China; Department of Applied Chemistry, China Agricultural University, Yuanmingyuan West Road 2, Beijing 100193, China.	triazole		Ecotoxicology and environmental safety

## Sheet: Total
Total amount of articles
PMID	Article Title	All Authors (Last, Initials)	Year	Usefull (Y/N)	Reason	Departament	Class	Experimental	Journal	Journal
28756521	Increased risk for hypothyroidism after anticholinesterase pesticide poisoning: a nationwide population-based study.	Huang, HS; Lee, KW; Ho, CH; Hsu, CC; Su, SB; Wang, JJ; Lin, HJ; Huang, CC	2017	Y	Too broad	Department of Emergency Medicine, Chi-Mei Medical Center, Tainan, Taiwan.	Carbamate	epi	Endocrine	Endocrine
25304545	Embryonic exposure to carbendazim induces the transcription of genes related to apoptosis, immunotoxicity and endocrine disruption in zebrafish (Danio rerio).	Jiang, J; Wu, S; Wu, C; An, X; Cai, L; Zhao, X	2014	Y	No thyroid endpoints	State Key Laboratory Breeding Base for Zhejiang Sustainable Pest and Disease Control, Institute of Quality and Standard for Agro-products, Zhejiang Academy of Agricultural Sciences, Hangzhou 310021, Zhejiang, China; Key Laboratory for Pesticide Residue Detection of Ministry of Agriculture, Institute of Quality and Standard for Agro-products, Zhejiang Academy of Agricultural Sciences, Hangzhou 310…	carbamate	in vivo	Fish & shellfish immunology	Fish Shellfish Immunol
25198283	Aerial application of mancozeb and urinary ethylene thiourea (ETU) concentrations among pregnant women in Costa Rica: the Infants' Environmental Health Study (ISA).	van Wendel de Joode, B; Mora, AM; Córdoba, L; Cano, JC; Quesada, R; Faniband, M; Wesseling, C; Ruepert, C; Oberg, M; Eskenazi, B; Mergler, D; Lindh, CH	2014	Y	fungicide	Programa Infantes y Salud Ambiental (ISA), Central American Institute for Studies on Toxic Substances (IRET), Universidad Nacional, Heredia, Costa Rica.	carbamate (dithiocarbamate)	epi	Environmental health perspectives	Environ Health Perspect
30408483	The case for thyroid disruption in early life stage exposures to thiram in zebrafish (Danio rerio).	Chen, X; Fang, M; Chernick, M; Wang, F; Yang, J; Yu, Y; Zheng, N; Teraoka, H; Nanba, S; Hiraga, T; Hinton, DE; Dong, W	2019	Y	Target	Inner Mongolia Key Laboratory of Toxicant Monitoring and Toxicology, Collage of Animal Science and Technology, Inner Mongolia University for Nationalities, Tongliao, Inner Mongolia 028000, China; Laboratory for Marine Fisheries Science and Food Production Processes, Qingdao National Laboratory for Marine Science and Technology, Key Laboratory of Maricultural Organism Disease Control, Ministry of …	carbamate (dithiocarbamate)	in vivo	General and comparative endocrinology	Gen Comp Endocrinol
30256155	Pesticide Use and Incident Hypothyroidism in Pesticide Applicators in the Agricultural Health Study.	Shrestha, S; Parks, CG; Goldner, WS; Kamel, F; Umbach, DM; Ward, MH; Lerro, CC; Koutros, S; Hofmann, JN; Beane Freeman, LE; Sandler, DP	2018	Y	Human	1 Epidemiology Branch, National Institute of Environmental Health Sciences (NIEHS) , Research Triangle Park, North Carolina, USA.	Compilation	epi	Environmental health perspectives	Environ Health Perspect
25965908	Association between Several Persistent Organic Pollutants and Thyroid Hormone Levels in Cord Blood Serum and Bloodspot of the Newborn Infants of Korea.	Kim, S; Park, J; Kim, HJ; Lee, JJ; Choi, G; Choi, S; Kim, S; Kim, SY; Moon, HB; Kim, S; Choi, K	2015	Y	POPs - Pregancy	School of Public Health, Seoul National University, Seoul, Republic of Korea.	Compilation (Persistent organic pollutants)	epi	PloS one	PLoS One
30059991	Association of In Utero Persistent Organic Pollutant Exposure With Placental Thyroid Hormones.	Li, ZM; Hernandez-Moreno, D; Main, KM; Skakkebæk, NE; Kiviranta, H; Toppari, J; Feldt-Rasmussen, U; Shen, H; Schramm, KW; De Angelis, M	2018	Y	POPs	Helmholtz Zentrum München-German Research Center for Environmental Health, Molecular EXposomics, Neuherberg, Germany.	Compilation (Persistent organic pollutants)	epi	Endocrinology	Endocrinology
28775130	Occupational pesticide exposure and subclinical hypothyroidism among male pesticide applicators.	Lerro, CC; Beane Freeman, LE; DellaValle, CT; Kibriya, MG; Aschebrook-Kilfoy, B; Jasmine, F; Koutros, S; Parks, CG; Sandler, DP; Alavanja, MCR; Hofmann, JN; Ward, MH	2018	Y	Subclinical / Banned	Division of Cancer Epidemiology and Genetics, National Cancer Institute, Rockville, Maryland, USA.	dinitroaniline / cyclodiene	epi	Occupational and environmental medicine	Occup Environ Med
28237669	Disruption of the hypothalamic-pituitary-thyroid axis on co-exposures to dithiocarbamate and neonicotinoid pesticides: Study in a wildlife bird, Amandava amandava.	Pandey, SP; Mohanty, B	2017	Y	Mixture	Department of Zoology, University of Allahabad, Allahabad 211002, U.P., India.	Mixture	epi	Neurotoxicology	Neurotoxicology
24530807	Pesticides in mixture disrupt metabolic regulation: in silico and in vivo analysis of cumulative toxicity of mancozeb and imidacloprid on body weight of mice.	Bhaskar, R; Mohanty, B	2014	Y	Mxiture (Mancozeb (MCZ) - Amidacloprid (IMI))	Department of Zoology, University of Allahabad, Allahabad 211002, India.	Mixture	in silico/in vivo	General and comparative endocrinology	Gen Comp Endocrinol
25497286	Assessment of serum biomarkers in rats after exposure to pesticides of different chemical classes.	Moser, VC; Stewart, N; Freeborn, DL; Crooks, J; MacMillan, DK; Hedge, JM; Wood, CE; McMahen, RL; Strynar, MJ; Herr, DW	2015	Y	Mixture	Neurotoxicology Branch/Toxicity Assessment Division, National Health and Environmental Effects Research Laboratory, Office of Research and Development, US Environmental Protection Agency, Research Triangle Park, NC 27711, USA. Electronic address: Moser.ginger@epa.gov.	Mixture	in vivo	Toxicology and applied pharmacology	Toxicol Appl Pharmacol
28119157	Endocrine disrupting pesticides impair the neuroendocrine regulation of reproductive behaviors and secondary sexual characters of red munia (Amandava amandava).	Pandey, SP; Tsutsui, K; Mohanty, B	2017	Y	Mixtures (mancozeb-MCZ a/ imidacloprid-IMI)	Department of Zoology, University of Allahabad, Allahabad 211002, U.P., India.	Mixture	in vivo	Physiology & behavior	Physiol Behav
25496744	The neonicotinoid pesticide imidacloprid and the dithiocarbamate fungicide mancozeb disrupt the pituitary-thyroid axis of a wildlife bird.	Pandey, SP; Mohanty, B	2015	Y	imidacloprid and mancozeb	Department of Zoology, University of Allahabad, Allahabad 211002, India. Electronic address: surya.zoology@gmail.com.	neonicotinoid/ dithiocarbamate	in vivo	Chemosphere	Chemosphere
29952068	Evaluation of neonicotinoid insecticides for oestrogenic, thyroidogenic and adipogenic activity reveals imidacloprid causes lipid accumulation.	Mesnage, R; Biserni, M; Genkova, D; Wesolowski, L; Antoniou, MN	2018	Y	No effect - Substitute	Gene Expression and Therapy Group, King's College London, Faculty of Life Sciences & Medicine, Department of Medical and Molecular Genetics, Guy's Hospital, London, SE1 9RT, UK.	neonycotinic	in vitro	Journal of applied toxicology : JAT	J Appl Toxicol
28639207	The cell biology of the thyroid-disrupting mechanism of dichlorodiphenyltrichloroethane (DDT).	Rossi, M; Taddei, AR; Fasciani, I; Maggio, R; Giorgi, F	2018	Y	DDT	Molecular Signaling Section, Laboratory of Bioorganic Chemistry, National Institute of Diabetes and Digestive and Kidney Diseases, Bethesda, MD, USA.	organohalogen	in vitro	Journal of endocrinological investigation	J Endocrinol Invest
24824690	Changes in thyroid status of rats after prolonged exposure to low dose dichlorodiphenyltrichloroethane.	Yaglova, NV; Yaglov, VV	2014	Y	low dose: 1.890±0.086 μg/kg for 6 weeks	Research Institute of Human Morphology, Russian Academy of Medical Sciences, Moscow, Russia, yaglova@mail.ru.	organohalogen	in vivo	Bulletin of experimental biology and medicine	Bull Exp Biol Med
28361414	Cytophysiological Changes in the Follicular Epithelium of the Thyroid Gland after Long-Term Exposure to Low Doses of Dichlorodiphenyltrichloroethane (DDT).	Yaglova, NV; Yaglov, VV	2017	Y	DDT	Research Institute of Human Morphology, Moscow, Russia. yaglova@mail.ru.	organohalogen	in vivo	Bulletin of experimental biology and medicine	Bull Exp Biol Med
25747818	Perinatal exposure to chlordecone, thyroid hormone status and neurodevelopment in infants: the Timoun cohort study in Guadeloupe (French West Indies).	Cordier, S; Bouquet, E; Warembourg, C; Massart, C; Rouget, F; Kadhel, P; Bataille, H; Monfort, C; Boucher, O; Muckle, G; Multigner, L	2015	Y	chlordecone	Inserm, U1085-IRSET, F-35000 Rennes, France; University of Rennes I, F-35000 Rennes, France. Electronic address: sylvaine.cordier@inserm.fr.	Organohalogen (organochlorine)	epi	Environmental research	Environ Res
27540871	Pesticide exposure and thyroid function in an agricultural population in Brazil.	Piccoli, C; Cremonese, C; Koifman, RJ; Koifman, S; Freire, C	2016	Y	Human	National School of Public Health, Oswaldo Cruz Foundation, CEP: 21041-210 Rio de Janeiro, Brazil. Electronic address: cami.piccolli@gmail.com.	Organohalogen (organochlorine)	epi	Environmental research	Environ Res
27344267	Association between organochlorine pesticide exposure and thyroid hormones in floriculture workers.	Blanco-Muñoz, J; Lacasaña, M; López-Flores, I; Rodríguez-Barranco, M; González-Alzaga, B; Bassol, S; Cebrian, ME; López-Carrillo, L; Aguilar-Garduño, C	2016	Y	Human	Instituto Nacional de Salud Pública (National Institute of Public Health), Cuernavaca, Mexico.	Organohalogen (organochlorine)	epi	Environmental research	Environ Res
28787707	Association of in utero exposure to organochlorine pesticides with thyroid hormone levels in cord blood of newborns.	Luo, D; Pu, Y; Tian, H; Wu, W; Sun, X; Zhou, T; Tao, Y; Yuan, J; Shen, X; Feng, Y; Mei, S	2017	Y	OCP - Preganancy	Key Laboratory of Environment and Health, Ministry of Education & Ministry of Environmental Protection, and State Key Laboratory of Environment Health (Incubation), School of Public Health, Tongji Medical College, Huazhong University of Science and Technology, #13 Hangkong Road, Wuhan, Hubei, 430030, China.	Organohalogen (organochlorine)	epi	Environmental pollution (Barking, Essex : 1987)	Environ Pollut
25093615	Hexachlorobenzene induces TGF-β1 expression, which is a regulator of p27 and cyclin D1 modifications.	Chiappini, F; Pontillo, C; Randi, A; Alvarez, L; Kleiman de Pisarev, DL	2014	Y	Low to high dose	Departamento de Bioquímica Humana, Facultad de Medicina, Universidad de Buenos, Buenos Aires, Argentina.	Organohalogen (organochlorine)	in vitro	Toxicology letters	Toxicol Lett
26150671	Organophosphate insecticide use and cancer incidence among spouses of pesticide applicators in the Agricultural Health Study.	Lerro, CC; Koutros, S; Andreotti, G; Friesen, MC; Alavanja, MC; Blair, A; Hoppin, JA; Sandler, DP; Lubin, JH; Ma, X; Zhang, Y; Beane Freeman, LE	2015	Y	Cancer	Occupational and Environmental Epidemiology Branch, Division of Cancer Epidemiology and Genetics, National Cancer Institute, Bethesda, Maryland, USA Yale University School of Public Health, New Haven, Connecticut, USA.	organophosphate	epi	Occupational and environmental medicine	Occup Environ Med
29028673	Association Between Organophosphate Pesticide Exposure and Thyroid Hormones in Pregnant Women.	Wang, Y; Chen, L; Wang, C; Hum, Y; Gao, Y; Zhou, Y; Shi, R; Zhang, Y; Kamijima, M; Ueyama, J; Tian, Y	2017	Y	Human	Form the aMOE and Shanghai Key Laboratory of Children's Environmental Health, Xinhua Hospital, Shanghai Jiao Tong University School of Medicine, Shanghai, China; bDepartment of Neonatology, Xinhua Hospital, Shanghai Jiao Tong University School of Medicine, Shanghai, China; cDepartment of Environmental Health, School of Public Health, Shanghai Jiao Tong University School of Medicine, Shanghai, Chi…	organophosphate	epi	Epidemiology (Cambridge, Mass.)	Epidemiology
29143548	Evaluation on the thyroid disrupting mechanism of malathion in Fischer rat thyroid follicular cell line FRTL-5.	Xiong, J; Tian, L; Qiu, Y; Sun, D; Zhang, H; Wu, M; Wang, J	2018	Y	Insecticide - In vitro	a Research Center for Public Health and Preventive Medicine , West China School of Public Health, Sichuan University , Chengdu , China.	organophosphate	in vitro	Drug and chemical toxicology	Drug Chem Toxicol
24630256	Impact of a short-term diazinon exposure on the osmoregulation potentiality of Caspian roach (Rutilus rutilus) fingerlings.	Katuli, KK; Amiri, BM; Massarsky, A; Yelghi, S; Ghasemzadeh, J	2014	Y	diazinon	Department of Fisheries, Faculty of Natural Resources, University of Tehran, Karaj, Iran. Electronic address: khosravi.kh@ut.ac.ir.	organophosphate	in vivo	Chemosphere	Chemosphere
29083300	Fish larval recruitment to reefs is a thyroid hormone-mediated metamorphosis sensitive to the pesticide chlorpyrifos.	Holzer, G; Besson, M; Lambert, A; François, L; Barth, P; Gillet, B; Hughes, S; Piganeau, G; Leulier, F; Viriot, L; Lecchini, D; Laudet, V	2017	Y	Chlorpyrifos	Institut de Génomique Fonctionnelle de Lyon, Université de Lyon, Université Claude Bernard Lyon 1, UMR CNRS 5242, Ecole Normale Supérieure de Lyon, Lyon, France.	organophosphate	in vivo	eLife	Elife
29803892	Quantitative analysis of in-vivo responses of reproductive and thyroid endpoints in male goldfish exposed to monocrotophos pesticide.	Zhang, X; Liu, W; Wang, J; Tian, H; Wang, W; Ru, S	2018	Y	Monocrotophos (MCP) pesticide	College of Marine Life Sciences, Ocean University of China, Qingdao 266003, China.	organophosphate	in vivo	Comparative biochemistry and physiology. Toxicology & pharmacology : CBP	Comp Biochem Physiol C Toxicol Pharmacol
30744622	The organophosphate pesticide -OP- malathion inducing thyroidal disruptions and failures in the metamorphosis of the Senegalese sole, Solea senegalensis.	Ortiz-Delgado, JB; Funes, V; Sarasquete, C	2019	Y	Target	Instituto de Ciencias Marinas de Andalucía-ICMAN, CSIC Campus Universitario Río San Pedro, 11510, Puerto Real, Cádiz, Spain. juanbosco.ortiz@icman.csic.es.	organophosphate	in vivo	BMC veterinary research	BMC Vet Res
25268935	Monocrotophos pesticide decreases the plasma levels of total 3,3',5-triiodo-l-thyronine and alters the expression of genes associated with the thyroidal axis in female goldfish (Carassius auratus).	Zhang, X; Tian, H; Wang, W; Ru, S	2014	Y	Low to high dose	College of Marine Life Sciences, Ocean University of China, Qingdao, China.	organophosphate	in vivo	PloS one	PLoS One
27905518	Pesticide toxicogenomics across scales: in vitro transcriptome predicts mechanisms and outcomes of exposure in vivo.	Porreca, I; D'Angelo, F; De Franceschi, L; Mattè, A; Ceccarelli, M; Iolascon, A; Zamò, A; Russo, F; Ravo, M; Tarallo, R; Scarfò, M; Weisz, A; De Felice, M; Mallardo, M; Ambrosino, C	2016	Y	Report essay	IRGS, Biogem, Via Camporeale, 83031, Ariano Irpino, Avellino, Italy.	organophosphate	in vivo/in vitro	Scientific reports	Sci Rep
29995019	Pesticide Exposure and Thyroid Function in Elementary School Children Living in an Agricultural Area, Brebes District, Indonesia.	Suhartono, S; Kartini, A; Subagio, HW; Budiyono, B; Utari, A; Suratman, S; Sakundarno, M	2018	Y	Children	Department of Environmental Health, Faculty of Public Health, Diponegoro University, Semarang, Indonesia. suhartono_damas@yahoo.com.	Organophosphate	epi	The international journal of occupational and environmental medicine	Int J Occup Environ Med
30718154	Distribution of fipronil in humans, and adverse health outcomes of in utero fipronil sulfone exposure in newborns.	Kim, YA; Yoon, YS; Kim, HS; Jeon, SJ; Cole, E; Lee, J; Kho, Y; Cho, YH	2019	Y	Pregnant	Departments of Obstetrics and Gynecology, Inje University Ilsan Paik Hospital, Goyang-si, Gyeonggi-do, 10380, Republic of Korea.	phenylpyrazolen (fipronil)	epi	International journal of hygiene and environmental health	Int J Hyg Environ Health
25112704	Endocrine disrupting potential of fipronil and its metabolite in reporter gene assays.	Lu, M; Du, J; Zhou, P; Chen, H; Lu, C; Zhang, Q	2015	Y	Fipronil + metabolite	College of Biological and Environmental Engineering, Zhejiang University of Technology, Hangzhou 310032, China.	phenylpyrazolen (fipronil)	in vitro	Chemosphere	Chemosphere
26409903	Prenatal exposure to fipronil disturbs maternal aggressive behavior in rats	Magalhães, JZ; Udo, MS; Sánchez-Sarmiento, AM; Carvalho, MP; Bernardi, MM; Spinosa, HS	2015	Y	Fipronil - No effect	Undergraduate in Biological Science, Universidade Presbiteriana Mackenzie, São Paulo, Brazil. Electronic address: juliazaccam@gmail.com.	phenylpyrazolen (fipronil)	in vivo	Neurotoxicology and teratology	Neurotoxicol Teratol
30681194	The effects of bifenthrin and temperature on the endocrinology of juvenile Chinook salmon.	Giroux, M; Gan, J; Schlenk, D	2019	Y	Mixture	Environmental Toxicology Graduate Program, University of California Riverside, Riverside, California, USA.	pyrethroid	in vivo	Environmental toxicology and chemistry	Environ Toxicol Chem
26994367	Permethrin is a potential thyroid-disrupting chemical: In vivo and in silico envidence.	Tu, W; Xu, C; Jin, Y; Lu, B; Lin, C; Wu, Y; Liu, W	2016	Y	In vivo - in silico	Research Institute of Poyang Lake, Jiangxi Academy of Sciences, Nanchang 330029, China; College of Environment, Zhejiang University of Technology, Hangzhou 310032, China.	pyrethroid	in vivo in silico	Aquatic toxicology (Amsterdam, Netherlands)	Aquat Toxicol
26556752	Acute exposure to synthetic pyrethroids causes bioconcentration and disruption of the hypothalamus-pituitary-thyroid axis in zebrafish embryos.	Tu, W; Xu, C; Lu, B; Lin, C; Wu, Y; Liu, W	2016	Y	Target	Research Institute of Poyang Lake, Jiangxi Academy of Sciences, Nanchang 330029, China; Institute of Environmental Science, College of Biological and Environmental Engineering, Zhejiang University of Technology, Hangzhou 310032, China.	pyrethroid synthetic	in vivo	The Science of the total environment	Sci Total Environ
29480392	Early life exposure of zebrafish (Danio rerio) to synthetic pyrethroids and their metabolites: a comparison of phenotypic and behavioral indicators and gene expression involved in the HPT axis and innate immune system.	Xu, C; Li, X; Jin, M; Sun, X; Niu, L; Lin, C; Liu, W	2018	Y	Inmune	Research Center of Environmental Science, College of Environment, Zhejiang University of Technology, Hangzhou, 310032, China. chaoxu@zjut.edu.cn.	pyrethroid synthetic	in vivo	Environmental science and pollution research international	Environ Sci Pollut Res Int
28970022	Stereoselective degradation and thyroid endocrine disruption of lambda-cyhalothrin in lizards (Eremias argus) following oral exposure.	Chang, J; Hao, W; Xu, Y; Xu, P; Li, W; Li, J; Wang, H	2018	Y	Pesticide	Research Center for Eco-Environmental Science, Chinese Academy of Sciences, Shuangqing RD 18, Beijing 100085, China; University of Chinese Academy of Sciences, Yuquan RD 19 a, Beijing 100049, China.	pyrethroid pesticides	in vivo	Environmental pollution (Barking, Essex : 1987)	Environ Pollut
28772355	Environmentally relevant levels of λ-cyhalothrin, fenvalerate, and permethrin cause developmental toxicity and disrupt endocrine system in zebrafish (Danio rerio) embryo.	Zhang, Q; Zhang, Y; Du, J; Zhao, M	2017	Y	λ-cyhalothrin	Key Laboratory of Microbial Technology for Industrial Pollution Control of Zhejiang Province, College of Environment, Zhejiang University of Technology, Hangzhou, Zhejiang, 310032, China.	pyrethroids	in vivo	Chemosphere	Chemosphere
28369636	Maternal Fenvalerate Exposure Induces Fetal Intrauterine Growth Restriction Through Disrupting Placental Thyroid Hormone Receptor Signaling.	Wang, B; Liu, JJ; Wang, Y; Fu, L; Shen, R; Yu, Z; Wang, H; Chen, YH; Zhang, C; Meng, XH; Xu, DX	2017	Y	human	Department of Maternal, Child, & Adolescent Health, Anhui Medical University, Hefei, China.	pyrethroids	in vivo	Toxicological sciences : an official journal of the Society of Toxicology	Toxicol Sci
24836137	Prenatal pyrethroid insecticide exposure and thyroid hormone levels and birth sizes of neonates.	Zhang, J; Yoshinaga, J; Hisada, A; Shiraishi, H; Shimodaira, K; Okai, T; Koyama, M; Watanabe, N; Suzuki, E; Shirakawa, M; Noda, Y; Komine, Y; Ariki, N; Kato, N	2014	Y	Children	Department of Environmental Studies, University of Tokyo, Kashiwanoha 5-1-5, Kashiwa, Chiba 277-8563, Japan.	pyrethroids	in vivo	The Science of the total environment	Sci Total Environ
29128804	Hexachlorobenzene as a persistent organic pollutant: Toxicity and molecular mechanism of action.	Starek-Świechowicz, B; Budziszewska, B; Starek, A	2017	Y	HCB	Department of Biochemical Toxicology, Chair of Toxicology, Medical College, Jagiellonian University, Kraków, Poland. Electronic address: mfstarek@cyf-kr.edu.pl.	Organohalogen (organochlorine)	epi	Pharmacological reports : PR	Pharmacol Rep
29267272	When enough data are not enough to enact policy: The failure to ban chlorpyrifos	Trasande, L	2017	Y	chlorpyrifos	Department of Pediatrics, New York University School of Medicine, New York, New York, United States of America.	organophosphate	epi	PLoS biology	PLoS Biol
24912403	Effects of glyphosate-based herbicides on survival, development, growth and sex ratios of wood frog (Lithobates sylvaticus) tadpoles. II: agriculturally relevant exposures to Roundup WeatherMax® and Vision® under laboratory conditions.	Lanctôt, C; Navarro-Martín, L; Robertson, C; Park, B; Jackman, P; Pauli, BD; Trudeau, VL	2014	Y	Low to high dose	Centre for Advanced Research in Environmental Genomics (CAREG), Department of Biology, University of Ottawa, Ottawa, Ontario K1N 6N5, Canada. Electronic address: c.lanctot@cqu.edu.au.	Glyphosate-based	in vivo	Aquatic toxicology (Amsterdam, Netherlands)	Aquat Toxicol
29698872	A nested case-control study of polychlorinated biphenyls, organochlorine pesticides, and thyroid cancer in the Janus Serum Bank cohort.	Lerro, CC; Jones, RR; Langseth, H; Grimsrud, TK; Engel, LS; Sjödin, A; Choo-Wosoba, H; Albert, P; Ward, MH	2018	Y	Cancer	Occupational and Environmental Epidemiology Branch, Division of Cancer Epidemiology and Genetics, National Cancer Institute, Rockville, MD, USA. Electronic address: lerrocc@mail.nih.gov.	Organohalogen (organochlorine)	epi	Environmental research	Environ Res
25846366	Pronamide: Weight of evidence for potential estrogen, androgen or thyroid effects.	Marty, MS; Papineni, S; Coady, KK; Rasoulpour, RJ; Pottenger, LH; Eisenbrandt, DL	2015	Y	pronamide	The Dow Chemical Company, Midland, MI, USA. Electronic address: mmarty@dow.com.	benzamides		Regulatory toxicology and pharmacology : RTP	Regul Toxicol Pharmacol
25108122	Butachlor causes disruption of HPG and HPT axes in adult female rare minnow (Gobiocypris rarus)	Zhu, L; Li, W; Zha, J; Wang, M; Yuan, L; Wang, Z	2014	Y	herbicide environmental relevant concentrations (0, 0.1, 1, and 10μg/L) for 40days	State Key Laboratory of Environmental Aquatic Chemistry, Research Center for Eco-Environmental Sciences, Chinese Academy of Sciences, P.O. Box 2871, Beijing 100085, China; Beijing Fishery Research Institute, Beijing 100068, China.	chloroacetamide		Chemico-biological interactions	Chem Biol Interact
28973306	Editor's Highlight: Structure-Based Investigation on the Binding and Activation of Typical Pesticides With Thyroid Receptor.	Xiang, D; Han, J; Yao, T; Wang, Q; Zhou, B; Mohamed, AD; Zhu, G	2017	Y	Different dose range	Institute of Pesticide and Environmental Toxicology, Zhejiang University, Hangzhou 310058, P.R. China.	Compilation		Toxicological sciences : an official journal of the Society of Toxicology	Toxicol Sci
24626741	Metabonomic analysis of the joint toxic action of long-term low-level exposure to a mixture of four organophosphate pesticidesin rat plasma.	Du, L; Li, S; Qi, L; Hou, Y; Zeng, Y; Xu, W; Wang, H; Zhao, X; Sun, C	2014	Y	Mixture	Department of Nutrition and Food Hygiene, Public Health College, Harbin Medical University, 194 Xuefu Road, Harbin, Heilongjiang, China 150081. xiujuan_zhao@sina.com sun2002changhao@126.com.	Mixture		Molecular bioSystems	Mol Biosyst
30114734	Changes in thyroid status of Menidia beryllina exposed to the antifouling booster irgarol: Impacts of temperature and salinity.	Moreira, LB; Diamante, G; Giroux, M; Xu, EG; Abessa, DMS; Schlenk, D	2018	Y	Irgarol	Institute of Biosciences, São Paulo State University, São Vicente, SP, Brazil; Department of Environmental Sciences, University of California Riverside, Riverside, CA, USA. Electronic address: lburuaem@gmail.com.	triazine		Chemosphere	Chemosphere
29554609	Comparison of triadimefon and its metabolite on acute toxicity and chronic effects during the early development of Rana nigromaculata tadpoles.	Zhang, W; Lu, Y; Huang, L; Cheng, C; Di, S; Chen, L; Zhou, Z; Diao, J	2018	Y	low to high dose	Beijing Advanced Innovation Center for Food Nutrition and Human Health, Yuanmingyuan West Road 2, Beijing 100193, China; Department of Applied Chemistry, China Agricultural University, Yuanmingyuan West Road 2, Beijing 100193, China.	triazole		Ecotoxicology and environmental safety	Ecotoxicol Environ Saf
29573713	River otters (Lontra canadensis)“trapped” in a coastal environment contaminated with persistent organic pollutants: Demographic and physiological consequences	Huang, AC; Nelson, C; Elliott, JE; Guertin, DA; Ritland, C; Drouillard, K; Cheng, KM; Schwantje, HM	2018	Y	Mixture (PCBs - dioxins - organochlorine insecticides )	Science & Technology Branch, Environment and Climate Change Canada, Delta, BC, Canada.	Organohalogen (organochlorine)		Environmental pollution (Barking, Essex : 1987)	Environ Pollut
27541960	The identification of the metabolites of chlorothalonil in zebrafish (Danio rerio) and their embryo toxicity and endocrine effects at environmentally relevant levels.	Zhang, Q; Ji, C; Yan, L; Lu, M; Lu, C; Zhao, M	2016	Y	Low doses	Beijing Advanced Innovation Center for Food Nutrition and Human Health, College of Environment, Zhejiang University of Technology, Hangzhou 310032, China.	Mixture		Environmental pollution (Barking, Essex : 1987)	Environ Pollut
28936635	Competition and pesticide exposure affect development of invasive (Rhinella marina) and native (Fejervarya vittigera) rice paddy amphibian larvae.	Shuman-Goodier, ME; Singleton, GR; Propper, CR	2017	Y	Herbicide	Department of Biological Sciences, Northern Arizona University, Flagstaff, AZ, 86001, USA. ms2883@nau.edu.	acetanilide		Ecotoxicology (London, England)	Ecotoxicology
27480594	Impact of co-exposure with butachlor and triadimefon on thyroid endocrine system in larval zebrafish.	Cao, C; Wang, Q; Jiao, F; Zhu, G	2016	Y	mixture	Institute of Pesticide and Environmental Toxicology, Zhejiang University, Hangzhou 310058, PR China.	acetanilide / triazol		Experimental and toxicologic pathology : official journal of the Gesellschaft fur Toxikologische Pathologie	Exp Toxicol Pathol
26971167	Exposure to butachlor causes thyroid endocrine disruption and promotion of metamorphosis in Xenopus laevis.	Li, S; Li, M; Wang, Q; Gui, W; Zhu, G	2016	Y	Pesticide	Institute of Pesticide and Environmental Toxicology, Zhejiang University, Hangzhou, 310058, PR China.	acetanilide		Chemosphere	Chemosphere
27103609	Enantioselectivity in Developmental Toxicity of rac-metalaxyl and R-metalaxyl in Zebrafish (Danio rerio) Embryo.	Zhang, Y; Zhang, Y; Chen, A; Zhang, W; Chen, H; Zhang, Q	2016	Y	High dose	College of Biological and Environmental Engineering, Zhejiang University of Technology, Hangzhou, China.	acylalanine		Chirality	Chirality
30114598	Acute exposure of zebrafish embryo (Danio rerio) to flutolanil reveals its developmental mechanism of toxicity via disrupting the thyroid system and metabolism.	Teng, M; Zhu, W; Wang, D; Yan, J; Qi, S; Song, M; Wang, C	2018	Y	fungicide	College of Sciences, China Agricultural University, Beijing, 100193, China.	amide		Environmental pollution (Barking, Essex : 1987)	Environ Pollut
28913779	Effects of sublethal Abamectin exposure on some hormonal profiles and testicular histopathology in male albino rats and the possible ameliorative role of Eruca	Hassan, HF; Meligi, NM	2017	Y	Abamectin	Zoology Department, Faculty of Science, Minia University, Minia, 61519, Egypt. hanaafawzy78@mu.edu.eg.	avermectin		Environmental science and pollution research international	Environ Sci Pollut Res Int
30639745	Amphibian (Rana nigromaculata)exposed to cyproconazole: Changes in growth index, behavioral endpoints, antioxidant biomarkers, thyroid and gonad development.	Zhang, W; Chen, L; Xu, Y; Deng, Y; Zhang, L; Qin, Y; Wang, Z; Liu, R; Zhou, Z; Diao, J	2019	Y	Azoles	Beijing Advanced Innovation Center for Food Nutrition and Human Health, Yuanmingyuan West Road 2, Beijing, 100193, China; Department of Applied Chemistry, China Agricultural University, Yuanmingyuan West Road 2, Beijing, 100193, China.	azoles		Aquatic toxicology (Amsterdam, Netherlands)	Aquat Toxicol
29017816	Oral and dermal diflubenzuron exposure causes a hypothalamic-pituitary-thyroid (HPT) axis disturbance in the Mongolian racerunner (Eremias argus).	Chang, J; Wang, H; Xu, P; Guo, B; Li, J; Wang, Y; Li, W	2018	Y	pesticide	Research Center for Eco-Environmental Sciences, Chinese Academy of Sciences, Shuangqing RD 18, Beijing, 100085, China; University of Chinese Academy of Sciences, Yuquan RD 19 a, Beijing, 100049, China.	benzoylurea		Environmental pollution (Barking, Essex : 1987)	Environ Pollut
30448662	Dose-dependent effects of flufenoxuron on thyroid system of mature female lizards (Eremias argus) and their offspring.	Chang, J; Li, W; Xu, P; Guo, B; Wang, H	2019	Y	Target	Research Center for Eco-Environmental Sciences, Chinese Academy of Sciences, Shuangqing RD 18, Beijing 100085, China. Electronic address: jingchang@rcees.ac.cn.	benzoylurea		The Science of the total environment	Sci Total Environ
28073034	Unraveling the different toxic effect of flufenoxuron on the thyroid endocrine system of the Mongolia racerunner (Eremias Argus) at different stages	Chang, J; Li, W; Guo, B; Xu, P; Wang, Y; Li, J; Wang, H	2017	Y	flufenoxuron	Research Center for Eco-Environmental Sciences, Chinese Academy of Sciences, Shuangqing RD 18, Beijing, 100085, China; University of Chinese Academy of Sciences, Yuquan RD 19 A, Beijing, 100049, China.	benzoylurea group		Chemosphere	Chemosphere
28073049	Iodine nutritional status and thyroid effects of exposure to ethylenebisdithiocarbamates	Medda, E; Santini, F; De Angelis, S; Franzellin, F; Fiumalbi, C; Perico, A; Gilardi, E; Mechi, MT; Marsili, A; Citroni, A; Leandri, A; Mantovani, A; Vitti, P; Olivieri, A	2017	Y	mancozeb	National Centre for Epidemiology Surveillance and Health Promotion, Italian National Institute of Health, Viale Regina Elena 299, 00161 Rome, Italy.	carbamate (dithiocarbamate)		Environmental research	Environ Res
30213553	Probabilistic cumulative dietary risk assessment of pesticide residues in foods for the German population based on food monitoring data from 2009 to 2014.	Sieke, C	2018	Y	chlorpyrifos - dithiocarbamates	German Federal Institute for Risk Assessment (BfR), Max-Dohrn-Str. 8-10, 10589, Berlin, Germany. Electronic address: Christian.Sieke@bfr.bund.de.	carbamate (dithiocarbamates)		Food and chemical toxicology : an international journal published for the British Industrial Biological Research Association	Food Chem Toxicol
28531659	Risk assessment of the endocrine-disrupting effects of nine chiral pesticides.	Song, Q; Zhang, Y; Yan, L; Wang, J; Lu, C; Zhang, Q; Zhao, M	2017	Y	Chiral pesticide	Key Laboratory of Microbial Technology for Industrial Pollution Control of Zhejiang Province, College of Environment, Zhejiang University of Technology, Hangzhou, Zhejiang, 310032, China.	chiral		Journal of hazardous materials	J Hazard Mater
26318563	Effect of acetochlor on transcription of genes associated with oxidative stress, apoptosis, immunotoxicity and endocrine disruption in the early life stage of zebrafish.	Jiang, J; Wu, S; Liu, X; Wang, Y; An, X; Cai, L; Zhao, X	2015	Y	acetochlor	Institute of Quality and Standard for Agro-products, Zhejiang Academy of Agricultural Sciences, 198 Shi Qiao Rd, Hangzhou 310021, Zhejiang, PR China. Electronic address: jinhuajiang85@163.com.	chloroacetanilides		Environmental toxicology and pharmacology	Environ Toxicol Pharmacol
26397822	Thyroid endocrine disruption of acetochlor on zebrafish (Danio rerio) larvae.	Yang, M; Hu, J; Li, S; Ma, Y; Gui, W; Zhu, G	2016	Y	Low doses	Institute of Pesticide and Environmental Toxicology, Zhejiang University, Hangzhou, China.	chloroacetanilides		Journal of applied toxicology : JAT	J Appl Toxicol
28629112	European demonstration program on the effect-based and chemical identification and monitoring of organic pollutants in European surface waters.	Tousova, Z; Oswald, P; Slobodnik, J; Blaha, L; Muz, M; Hu, M; Brack, W; Krauss, M; Di Paolo, C; Tarcai, Z; Seiler, TB; Hollert, H; Koprivica, S; Ahel, M; Schollée, JE; Hollender, J; Suter, MJ; Hidasi, AO; Schirmer, K; Sonavane, M; Ait-Aissa, S; Creusot, N; Brion, F; Froment, J; Almeida, AC; Thomas, K; Tollefsen, KE; Tufi, S; Ouyang, X; Leonards, P; Lamoree, M; Torrens, VO; Kolkman, A; Schriks, M;…	2017	Y	Complete	Environmental Institute (EI), Okruzna 784/42, 972 41 Kos, Slovak Republic; Masaryk University, Faculty of Science, RECETOX, Kamenice 753/5, 625 00 Brno, Czech Republic.	Compilation		The Science of the total environment	Sci Total Environ
29023046	Assessment of Pesticide Residues in Human Blood and Effects of Occupational Exposure on Hematological and Hormonal Qualities.	Nassar, AMK; Salim, YM; Malhat, FM	2016	Y	Human	Department of Plant Protection, Faculty of Agriculture, Damanhour University, Damanhour, Albeheira 22516, Egypt.	Compilation		Pakistan journal of biological sciences : PJBS	Pak J Biol Sci
26906244	Exposure to Thyroid-Disrupting Chemicals: A Transatlantic Call for Action.	Leung, AM; Korevaar, TI; Peeters, RP; Zoeller, RT; Köhrle, J; Duntas, LH; Brent, GA; Demeneix, BA	2016	Y	Deep review	1 Division of Endocrinology, UCLA David Geffen School of Medicine , Los Angeles, California.	Compilation		Thyroid : official journal of the American Thyroid Association	Thyroid
28857258	Summary of the development the US Environmental Protection Agency's Medaka Extended One Generation Reproduction Test (MEOGRT) using data from 9 multigenerational medaka tests.	Flynn, K; Lothenbach, D; Whiteman, F; Hammermeister, D; Touart, LW; Swintek, J; Tatarazako, N; Onishi, Y; Iguchi, T; Johnson, R	2017	Y	OECD	Mid-Continent Ecology Division, US Environmental Protection Agency, Duluth, Minnesota.	Compilation		Environmental toxicology and chemistry	Environ Toxicol Chem
27965130	Approaches for grouping of pesticides into cumulative assessment groups for risk assessment of pesticide residues in food	Colnot, T; Dekant, W	2017	Y	Review	CiS Toxicology, Osorno, Chile.	Compilation		Regulatory toxicology and pharmacology : RTP	Regul Toxicol Pharmacol
28202579	Occupational exposure to pesticides and other biocides and risk of thyroid cancer.	Zeng, F; Lerro, C; Lavoué, J; Huang, H; Siemiatycki, J; Zhao, N; Ma, S; Deziel, NC; Friesen, MC; Udelsman, R; Zhang, Y	2017	Y	Biocide	Chongqing Safety Engineering Institute, Chongqing University of Science and Technology, Chongqing, China.	Compilation		Occupational and environmental medicine	Occup Environ Med
30006252	Endocrine Disruption: Current approaches for regulatory testing and assessment of plant protection products are fit for purpose.	Day, P; Green, RM; Gross, M; Weltje, L; Wheeler, JR	2018	Y	Deep review	European Crop Protection Association (ECPA) aisbl, 6 Avenue E. van Nieuwenhuyse, 1160 Brussels, Belgium.	Compilation		Toxicology letters	Toxicol Lett
29908479	Incident thyroid disease in female spouses of private pesticide applicators.	Shrestha, S; Parks, CG; Goldner, WS; Kamel, F; Umbach, DM; Ward, MH; Lerro, CC; Koutros, S; Hofmann, JN; Beane Freeman, LE; Sandler, DP	2018	Y	Human	Epidemiology Branch, National Institute of Environmental Health Sciences, Research Triangle Park, NC, USA.	Compilation		Environment international	Environ Int
30685774	Pesticide Exposure and Stunting among Children in Agricultural Areas.	Kartini, A; Subagio, HW; Hadisaputro, S; Kartasurya, MI; Suhartono, S; Budiyono, B	2019	Y	Human	Department of Public Health Nutrition, Faculty of Public Health, Diponegoro University, Semarang, Indonesia.	Compilation		The international journal of occupational and environmental medicine	Int J Occup Environ Med
30476775	Occupational exposure to pesticides and thyroid function in Brazilian soybean farmers.	Bernieri, T; Rodrigues, D; Barbosa, IR; Ardenghi, PG; Basso da Silva, L	2019	Y	Deep review	Department of Health Sciences, Feevale University, ERS-239, 2755, Zip Code: 93525-075, Novo Hamburgo, Rio Grande do Sul, Brazil.	Compilation		Chemosphere	Chemosphere
29499468	Persistent organic pollutants and organophosphate esters in feathers and blood plasma of adult kittiwakes (Rissa tridactyla) from Svalbard - associations with body condition and thyroid hormones.	Svendsen, NB; Herzke, D; Harju, M; Bech, C; Gabrielsen, GW; Jaspers, VLB	2018	Y	POPs	Department of Biology, Norwegian University of Science and Technology (NTNU), NO-7491 Trondheim, Norway. Electronic address: nbos@niras.dk.	Compilation (Persistent organic pollutants)		Environmental research	Environ Res
27265299	Exposure to non-persistent pesticides and thyroid function: A systematic review of epidemiological evidence.	Campos, É; Freire, C	2016	Y	Non-persistant	National School of Public Health, Oswaldo Cruz Foundation (FIOCRUZ), Rio de Janeiro, Brazil. Electronic address: elidacamp@hotmail.com.	Compilation (non-persistant)		International journal of hygiene and environmental health	Int J Hyg Environ Health
28980919	Risk assessment of a formamidine pesticide, Amitraz, focusing on thyroid hormone receptors (TRs) in rainbow trout, Oncorhynchus mykiss.	Meriç Turgut, I; Keskin, E	2017	Y	Amitraz	Faculty of Agriculture, Department of Fisheries and Aquaculture Engineering, Ankara University, Dişkapi, Ankara, Turkey.	formamidine		Cellular and molecular biology (Noisy-le-Grand, France)	Cell Mol Biol (Noisy-le-grand)
27916585	Perinatal exposure to glyphosate-based herbicide alters the thyrotrophic axis and causes thyroidhormone homeostasis imbalance in male rats.	de Souza, JS; Kizys, MM; da Conceição, RR; Glebocki, G; Romano, RM; Ortiga-Carvalho, TM; Giannocco, G; da Silva, ID; Dias da Silva, MR; Romano, MA; Chiamolera, MI	2017	Y	Gliphosate	Universidade Federal de São Paulo, Unifesp/EPM, Departamento de Medicina, Disciplina de Endocrinologia Clínica, Laboratório de Endocrinologia Molecular e Translacional (LEMT), São Paulo, Brazil.	Gliphosate-based		Toxicology	Toxicology
24878356	Effects of glyphosate-based herbicides on survival, development, growth and sex ratios of wood frogs (Lithobates sylvaticus) tadpoles. I: chronic laboratory exposures to VisionMax®.	Navarro-Martín, L; Lanctôt, C; Jackman, P; Park, BJ; Doe, K; Pauli, BD; Trudeau, VL	2014	Y	High dose	Centre for Advanced Research in Environmental Genomics (CAREG), Department of Biology, University of Ottawa, Ottawa, ON K1N 6N5, Canada. Electronic address: laianavarromartin@gmail.com.	Glyphosate-based		Aquatic toxicology (Amsterdam, Netherlands)	Aquat Toxicol
29674245	Effects of multiple life stage exposure to the fungicide prochloraz in Xenopus laevis: Manifestations of antiandrogenic and other modes of toxicity.	Haselman, JT; Kosian, PA; Korte, JJ; Olmstead, AW; Degitz, SJ	2018	Y	Prochloraz	US EPA Mid-Continent Ecology Division, 6201 Congdon Blvd, Duluth, MN, 55804, USA. Electronic address: haselman.jon@epa.gov.	imidazole		Aquatic toxicology (Amsterdam, Netherlands)	Aquat Toxicol
24449421	Ioxynil and tetrabromobisphenol A suppress thyroid-hormone-induced activation of transcriptional elongation mediated by histone modifications and RNA polymerase II phosphorylation.	Otsuka, S; Ishihara, A; Yamauchi, K	2014	Y	Mixture	Department of Biological Science, Graduate School of Science, Shizuoka University, Shizuoka 422-8529, Japan.	Mixture		Toxicological sciences : an official journal of the Society of Toxicology	Toxicol Sci
25684042	Effects of currently used pesticides and their mixtures on the function of thyroid hormone and aryl hydrocarbon receptor in cell culture.	Ghisari, M; Long, M; Tabbo, A; Bonefeld-Jørgensen, EC	2015	Y	Mixture	Centre for Arctic Health & Unit of Cellular and Molecular Toxicology, Department of Public Health, Aarhus University, Aarhus, Denmark.	Mixture		Toxicology and applied pharmacology	Toxicol Appl Pharmacol
28431984	Thyroid disrupting pesticides impair the hypothalamic-pituitary-testicular axis of a wildlife bird, Amandava amandava.	Mohanty, B; Pandey, SP; Tsutsui, K	2017	Y	Mixtures (mancozeb - imidacloprid)	Department of Zoology, University of Allahabad, Allahabad, India. Electronic address: drbana_mohanty@rediffmail.com.	Mixture		Reproductive toxicology (Elmsford, N.Y.)	Reprod Toxicol
30685453	Ioxynil and diethylstilbestrol disrupt vascular and heart development in zebrafish.	Li, YF; Canário, AVM; Power, DM; Campinho, MA	2019	Y	Mixture	International Research Centre for Marine Biosciences, Ministry of Science and Technology, Shanghai Ocean University, Shanghai, China; Key Laboratory of Exploration and Utilization of Aquatic Genetic Resources, Ministry of Education, Shanghai Ocean University, Shanghai, China; National Demonstration Center for Experimental Fisheries Science Education, Shanghai Ocean University, Shanghai, China; Ce…	Mixture		Environment international	Environ Int
26519832	Snapping Turtles (Chelydra serpentina) from Canadian Areas of Concern across the southern Laurentian Great Lakes: Chlorinated and brominated hydrocarbon contaminants and metabolites in relation to circulating concentrations of thyroxine and vitamin A.	Letcher, RJ; Lu, Z; de Solla, SR; Sandau, CD; Fernie, KJ	2015	Y	reptiles	Ecotoxicology and Wildlife Health Division, Science and Technology Branch, Environment Canada, National Wildlife Research Centre, Carleton University, Ottawa, Ontario, Canada K1A 0H3. Electronic address: robert.letcher@ec.gc.ca.	organohalogen		Environmental research	Environ Res
26747993	Associations between organohalogen concentrations and transcription of thyroid-related genes in a highly contaminated gull population.	Técher, R; Houde, M; Verreault, J	2016	Y	Target	Centre de recherche en toxicologie de l'environnement (TOXEN), Département des sciences biologiques, Université du Québec à Montréal, C.P. 8888, Succursale Centre-ville, Montreal, QC H3C 3P8, Canada. Electronic address: techer.romy@courrier.uqam.ca.	organohalogen		The Science of the total environment	Sci Total Environ
28256742	Halogenated phenolic compounds in wild fish from Canadian Areas of Concern.	Gilroy, ÈAM; Muir, DCG; McMaster, ME; Darling, C; Campbell, LM; Alaee, M; Brown, SB; Sherry, JP	2017	Y	Pesticide detection essay	Green House Science, Burlington, Ontario, Canada.	organohalogen		Environmental toxicology and chemistry	Environ Toxicol Chem
30664974	Prenatal exposure to organohalogen compounds and children's mental and motor development at 18 and 30 months of age.	Ruel, MVM; Bos, AF; Soechitram, SD; Meijer, L; Sauer, PJJ; Berghuis, SA	2019	Y	No thyroid endpoints	Division of Neonatology, Department of Pediatrics, Beatrix Children's Hospital, University of Groningen, University Medical Center Groningen, Groningen, the Netherlands.	Organohalogen		Neurotoxicology	Neurotoxicology
28454037	Agricultural expansion as risk to endangered wildlife: Pesticide exposure in wild chimpanzees and baboons displaying facial dysplasia.	Krief, S; Berny, P; Gumisiriza, F; Gross, R; Demeneix, B; Fini, JB; Chapman, CA; Chapman, LJ; Seguya, A; Wasswa, J	2017	Y	DDT	UMR 7206 CNRS/MNHN/P7, Eco-anthropologie et ethnobiologie, Hommes, et Environnements, Museum national d'Histoire naturelle, Musée de l'Homme, 17 place du Trocadéro, 75016 Paris, France; Great Ape Conservation Project (GACP), Sebitoli Research Station, Kibale National Park, Fort Portal, Uganda. Electronic address: sabrina.krief@mnhn.fr.	organohalogen		The Science of the total environment	Sci Total Environ
30609499	The endocrine-disrupting potential of four chlorophenols by in vitro and in silico assay.	Yu, C; Wang, C; Lu, Z; Zhang, C; Dai, W; Yu, S; Lin, S; Zhang, Q	2019	Y	In vitro - In silico	Key Laboratory of Microbial Technology for Industrial Pollution Control of Zhejiang Province, College of Environment, Zhejiang University of Technology, Hangzhou, Zhejiang, 310032, China.	Organohalogen (organochlorine)		Chemosphere	Chemosphere
25463847	Relative developmental toxicities of pentachloroanisole and pentachlorophenol in a zebrafish model (Danio rerio).	Cheng, Y; Ekker, M; Chan, HM	2015	Y	Target	Center for Advanced Research in Environmental Genomics, University of Ottawa, 30 Marie Curie, Ottawa, ON, Canada K1N 6N5.	Organohalogen (organochlorine)		Ecotoxicology and environmental safety	Ecotoxicol Environ Saf
28554005	Contaminants and energy expenditure in an Arctic seabird: Organochlorine pesticides and perfluoroalkyl substances are associated with metabolic rate in a contrasted manner.	Blévin, P; Tartu, S; Ellis, HI; Chastel, O; Bustamante, P; Parenteau, C; Herzke, D; Angelier, F; Gabrielsen, GW	2017	Y	organochlorines (OCs), perfluoroalkyl substances (PFASs), and mercury)	Centre d'Etudes Biologiques de Chizé (CEBC), UMR 7372 - CNRS & Université de la Rochelle, 79360 Villiers-en-Bois, France. Electronic address: blevin.pierre@gmail.com.	Organohalogen (organochlorine)		Environmental research	Environ Res
30570004	[Pesticides and hypothyroidism in farmers of plantain and coffee growing areas in Quindio, Colombia].	Londoño, ÁL; Restrepo, B; Sánchez, JF; García-Ríos, A; Bayona, A; Landázuri, P	2018	Y	pesticides hypothrioidism	AL: MD. Ph. D. Medicina Preventiva y Salud Pública. Esp. Epidemiología. Facultad de Ciencias de la Salud, Universidad del Quindío. Armenia, Colombia. angelalilianal@uniquindio.edu.co.	Organohalogen (organochlorine)		Revista de salud publica (Bogota, Colombia)	Rev Salud Publica (Bogota)
28624628	Time-dependent inhibitory effects of Tris(1, 3-dichloro-2-propyl) phosphate on growth and transcription of genes involved in the GH/IGF axis, but not the HPT axis, in female zebrafish.	Zhu, Y; Su, G; Yang, D; Zhang, Y; Yu, L; Li, Y; Giesy, JP; Letcher, RJ; Liu, C	2017	Y	No effect	College of Fisheries, Huazhong Agricultural University, Wuhan 430070, China.	Organohalogen (organochlorine)		Environmental pollution (Barking, Essex : 1987)	Environ Pollut
29316515	The body burden and thyroid disruption in lizards (Eremias argus) living in benzoylurea pesticides-contaminated soil.	Chang, J; Li, J; Hao, W; Wang, H; Li, W; Guo, B; Li, J; Wang, Y; Xu, P	2018	Y	Dermal effect	Research Center for Eco-Environmental Sciences, Chinese Academy of Sciences, Shuangqing RD 18, Beijing, 100085, China; University of Chinese Academy of Sciences, Yuquan RD 19A, Beijing, 100049, China.	Organohalogen (organochlorine)		Journal of hazardous materials	J Hazard Mater
29579638	Association between organohalogenated pollutants in cord blood and thyroid function in newborns and mothers from Belgian population.	Dufour, P; Pirard, C; Seghaye, MC; Charlier, C	2018	Y	organohalogenated pollutants	Laboratory of Clinical, Forensic and Environmental Toxicology, University of Liege (ULg), CHU (B35), 4000, Liege, Belgium; Center for Interdisciplinary Research on Medicines (C.I.R.M.), University of Liege (ULg), CHU (B35), 4000, Liege, Belgium. Electronic address: pdufour@ulg.ac.be.	organohalogenated pollutants		Environmental pollution (Barking, Essex : 1987)	Environ Pollut
30346759	Metabolism of Diflubenzuron in Lizard ( Eremias argus) and Comparative Toxicity of Diflubenzuron and Its Metabolite.	Wang, H; Xie, Y; Jiao, M; Hu, X; Li, J; Xu, P; Zhang, Y; Chang, J	2018	Y	diflubenzuron	Research Center for Eco-Environmental Sciences , Chinese Academy of Sciences , Shuangqing RD 18 , Beijing 100085 , China.	organohalogenated pollutants		Journal of agricultural and food chemistry	J Agric Food Chem
24998971	Tris(2-butoxyethyl)phosphate and triethyl phosphate alter embryonic development, hepatic mRNA expression, thyroid hormone levels, and circulating bile acid concentrations in chicken embryos.	Egloff, C; Crump, D; Porter, E; Williams, KL; Letcher, RJ; Gauthier, LT; Kennedy, SW	2014	Y	Target	National Wildlife Research Centre, Environment Canada, Ottawa, ON K1A 0H3, Canada.	organophosphate		Toxicology and applied pharmacology	Toxicol Appl Pharmacol
25826601	Bioconcentration and transfer of the organophorous flame retardant 1,3-dichloro-2-propyl phosphate causes thyroid endocrine disruption and developmental neurotoxicity in zebrafish larvae.	Wang, Q; Lai, NL; Wang, X; Guo, Y; Lam, PK; Lam, JC; Zhou, B	2015	Y	Transfer offspring	†State Key Laboratory of Freshwater Ecology and Biotechnology, Institute of Hydrobiology, Chinese Academy of Sciences, Wuhan, Hubei 430072, China.	Organophosphate		Environmental science & technology	Environ Sci Technol
26356387	Bioconcentration, metabolism and alterations of thyroid hormones of Tris(1,3-dichloro-2-propyl) phosphate (TDCPP) in Zebrafish.	Xu, T; Wang, Q; Shi, Q; Fang, Q; Guo, Y; Zhou, B	2015	Y	Target	Puai Hospital, Huazhong University of Science and Technology, Wuhan 430033, China.	organophosphate		Environmental toxicology and pharmacology	Environ Toxicol Pharmacol
26562049	Differential modulation of expression of nuclear receptor mediated genes by tris(2-butoxyethyl) phosphate (TBOEP) on early life stages of zebrafish (Danio rerio).	Ma, Z; Yu, Y; Tang, S; Liu, H; Su, G; Xie, Y; Giesy, JP; Hecker, M; Yu, H	2015	Y	Pesticide substitute	State Key Laboratory of Pollution Control and Resource Reuse, School of the Environment, Nanjing University, Nanjing, Jiangsu 210023, China. Electronic address: zhiyuan_nju@163.com.	organophosphate		Aquatic toxicology (Amsterdam, Netherlands)	Aquat Toxicol
25855011	Effects of chlorpyrifos on in vitro sex steroid production and thyroid follicular development in adult and larval Lake Sturgeon, Acipenser fulvescens.	Brandt, C; Burnett, DC; Arcinas, L; Palace, V; Gary Anderson, W	2015	Y	No effect	Department of Biological Sciences, 150 Sifton Road, University of Manitoba, Winnipeg, MB R3T 2N2, Canada; North/South Consultants Inc., 83 Scurfield Boulevard, Winnipeg R3Y 1G4, Canada.	organophosphate		Chemosphere	Chemosphere
26547027	Effects of tris (2-butoxyethyl) phosphate (TBOEP) on endocrine axes during development of early life stages of zebrafish (Danio rerio).	Ma, Z; Tang, S; Su, G; Miao, Y; Liu, H; Xie, Y; Giesy, JP; Saunders, DM; Hecker, M; Yu, H	2016	Y	Target	State Key Laboratory of Pollution Control and Resource Reuse, School of the Environment, Nanjing University, Nanjing, 210023, China.	Organophosphate		Chemosphere	Chemosphere
26865342	Long-term exposure to triphenylphosphate alters hormone balance and HPG, HPI, and HPT gene expression in zebrafish (Danio rerio).	Liu, X; Jung, D; Jo, A; Ji, K; Moon, HB; Choi, K	2016	Y	Target	School of Public Health, Seoul National University, Seoul, Republic of Korea.	organophosphate		Environmental toxicology and chemistry	Environ Toxicol Chem
27562511	Taurine ameliorated thyroid function in rats co-administered with chlorpyrifos and lead.	Akande, MG; Shittu, M; Uchendu, C; Yaqub, LS	2016	Y	Protective effect	Department of Veterinary Pharmacology and Toxicology, Faculty of Veterinary Medicine, University of Abuja, Abuja, Federal Capital Territory, 900001, Nigeria. akande.ganiyat@uniabuja.edu.ng.	organophosphate		Veterinary research communications	Vet Res Commun
27905040	Morphofunctional Changes in the Thyroid Gland of Pubertal and Postpubertal Rats Exposed to Low Dose of DDT.	Yaglova, NV; Sledneva, YP; Yaglov, VV	2016	Y	DDT	Research Institute of Human Morphology, Moscow, Russia. yaglova@mail.ru.	organophosphate		Bulletin of experimental biology and medicine	Bull Exp Biol Med
27838902	Association between thyroid function and urinary levels of 3,5,6-trichloro-2-pyridinol: data from NHANES 2007-2008.	Jain, RB	2017	Y	Insecticide - Human	, 2959 Estate View Court, Dacula, GA, 30019, USA. Jain.ram.b@gmail.com.	organophosphate		Environmental science and pollution research international	Environ Sci Pollut Res Int
30149310	Effects of environmentally relevant concentrations of tris (2-butoxyethyl) phosphate on growth and transcription of genes involved in the GH/IGF and HPT axes in zebrafish (Danio rerio).	Zeng, X; Sun, H; Huang, Y; Liu, J; Yu, L; Liu, C; Wang, J	2018	Y	Chemosphere	College of Fisheries, Huazhong Agricultural University, Wuhan 430070, China.	organophosphate		Chemosphere	Chemosphere
30508752	Effects of tris(1,3-dichloro-2-propyl) phosphate (TDCPP) and triphenyl phosphate (TPP) on sex-dependent alterations of thyroid hormones in adult zebrafish.	Liu, X; Cai, Y; Wang, Y; Xu, S; Ji, K; Choi, K	2019	Y	Target	School of Public Health, Dongguan Key Laboratory of Environmental Medicine, Guangdong Medical University, Guangdong 523-808, China.	Organophosphate		Ecotoxicology and environmental safety	Ecotoxicol Environ Saf
27372132	In vitro assessment of thyroid hormone receptor activity of four organophosphate esters.	Ren, X; Cao, L; Yang, Y; Wan, B; Wang, S; Guo, L	2016	Y	Molecular docking	State Key Laboratory of Environmental Chemistry and Eco-toxicology, Research Centre for Eco-environmental Sciences, Chinese Academy of Sciences, Beijing 100085, China. Electronic address: xmren@rcees.ac.cn.	organophosphate esters.		Journal of environmental sciences (China)	J Environ Sci (China)
29031942	Morbidity in New Zealand pesticide producers exposed to 2,3,7,8-tetrachlorodibenzo-p-dioxin (TCDD).	't Mannetje, A; Eng, A; Walls, C; Dryson, E; Douwes, J; Bertazzi, P; Ryder-Lewis, S; Scott, D; Brooks, C; McLean, D; Cheng, S; Pearce, N	2018	Y	2,3,7,8-tetrachlorodibenzo-p-dioxin	Centre for Public Health Research, Massey University, PO Box 756, Wellington 6021, New Zealand. Electronic address: a.mannetje@massey.ac.nz.	Organophosphate pesticide		Environment international	Environ Int
29306024	Organophosphate triesters and selected metabolites enhance binding of thyroxine to human transthyretin in vitro.	Hill, KL; Hamers, T; Kamstra, JH; Willmore, WG; Letcher, RJ	2018	Y	Mode of action	Ecotoxicology and Wildlife Health Division, Environment and Climate Change Canada, National Wildlife Research Centre, Carleton University, Ottawa, Canada; Department of Biology, Carleton University, Ottawa, Canada; Intrinsik Corp., Ottawa, Canada.	Organophosphate triesters		Toxicology letters	Toxicol Lett
25138556	Endocrine actions of pesticides measured in the Flemish environment and health studies (FLEHS I and II).	Croes, K; Den Hond, E; Bruckers, L; Govarts, E; Schoeters, G; Covaci, A; Loots, I; Morrens, B; Nelen, V; Sioen, I; Van Larebeke, N; Baeyens, W	2015	Y	Really interesting	Department of Analytical, Environmental and Geo-Chemistry (AMGC), Vrije Universiteit Brussel, Pleinlaan 2, 1050, Brussels, Belgium. kim.croes@vub.ac.be.	organophosphorus		Environmental science and pollution research international	Environ Sci Pollut Res Int
27291460	Population and life-stage-specific effects of two herbicide formulations on the aquatic development of European common frogs (Rana temporaria).	Wagner, N; Veith, M; Lötters, S; Viertel, B	2017	Y	Low to high doses	Trier University, Department of Biogeography, Trier, Germany.	organophosphorus		Environmental toxicology and chemistry	Environ Toxicol Chem
26208032	Development and Characterization of a Human Reporter Cell Line for the Assessment of Thyroid Receptor Transcriptional Activity: A Case of Organotin Endocrine Disruptors.	Illés, P; Brtko, J; Dvořák, Z	2015	Y	Reporter line	†Department of Cell Biology and Genetics, Faculty of Science, Palacky University, Slechtitelu 11, 783 71 Olomouc, Czech Republic.	organotin		Journal of agricultural and food chemistry	J Agric Food Chem
26970056	Thyroid endocrine disruption of azocyclotin to Xenopus laevis during metamorphosis.	Li, M; Cao, C; Li, S; Gui, W; Zhu, G	2016	Y	Complete	Institute of Pesticide and Environmental Toxicology, Zhejiang University, Hangzhou 310058, PR China.	Organotin compounds		Environmental toxicology and pharmacology	Environ Toxicol Pharmacol
26971175	Tributyltin disrupts feeding and energy metabolism in the goldfish (Carassius auratus).	Zhang, J; Sun, P; Yang, F; Kong, T; Zhang, R	2016	Y	Thyroid metabolism	Henan Open Laboratory of Key Subjects of Environmental and Animal Products Safety, College of Animal Science and Technology, Henan University of Science and Technology, Henan, China. Electronic address: jiliang_zhang@126.com.	organotin compounds		Chemosphere	Chemosphere
28774778	Frontiers in endocrine disruption: Impacts of organotin on the hypothalamus-pituitary-thyroid axis.	Santos-Silva, AP; Andrade, MN; Pereira-Rodrigues, P; Paiva-Melo, FD; Soares, P; Graceli, JB; Dias, GRM; Ferreira, ACF; de Carvalho, DP; Miranda-Alves, L	2018	Y	Tributyltin (TBT)	Grupo de Pesquisa, Desenvolvimento e Inovação em Endocrinologia Experimental-GPDIEEx, Instituto de Ciências Biomédicas, Universidade Federal do Rio de Janeiro, Brazil; Pós-graduação em Endocrinologia, Faculdade de Medicina, Universidade Federal do Rio de Janeiro, Brazil; Laboratório de Fisiologia Endócrina Doris Rosenthal, Instituto de Biofísica Carlos Chagas Filho, Universidade Federal do Rio de…	Orgatonin		Molecular and cellular endocrinology	Mol Cell Endocrinol
28634053	Using short-term bioassays to evaluate the endocrine disrupting capacity of the pesticides linuron and fenoxycarb.	Spirhanzlova, P; De Groef, B; Nicholson, FE; Grommen, SVH; Marras, G; Sébillot, A; Demeneix, BA; Pallud-Mothré, S; Lemkine, GF; Tindall, AJ; Du Pasquier, D	2017	Y	fenoxycarb and linuron	Laboratoire WatchFrog S.A., 1 Rue Pierre Fontaine, 91000 Évry, France; UMR CNRS 5166, Evolution des Régulations Endocriniennes, Department of Regulation, Development and Molecular Diversity, Muséum National d'Histoire Naturelle, Paris, France.	phenyl-urea / carbamate		Comparative biochemistry and physiology. Toxicology & pharmacology : CBP	Comp Biochem Physiol C Toxicol Pharmacol
26676543	Variability in the levels of 3-phenoxybenzoic acid (3BPA) by age, gender, and race/ethnicity for the period of 2001-2002 versus 2009-2010 and its association with thyroid function among general US population.	Jain, RB	2016	Y	Human	, 2959 Estate View Court, Dacula, GA, 30019, USA. Jain.ram.b@gmail.com.	pyrethroid		Environmental science and pollution research international	Environ Sci Pollut Res Int
29922588	Toxic effects of Lambda-cyhalothrin, on the rat thyroid: Involvement of oxidative stress and ameliorative effect of ginger extract.	Al-Amoudi, WM	2018	Y	Protective effect	Department of Biology, Faculty of Applied Sciences, Umm Al-Qura University, Makkah 21955, Saudi Arabia.	pyrethroid synthetic		Toxicology reports	Toxicol Rep
27239967	Inhibition effect of cypermethrin mediated by co-regulators SRC-1 and SMRT in interleukin-6-induced androgen receptor activation.	Wang, Q; Zhou, JL; Wang, H; Ju, Q; Ding, Z; Zhou, XL; Ge, X; Shi, QM; Pan, C; Zhang, JP; Zhang, MR; Yu, HM; Xu, LC	2016	Y	cypermethrin	School of Public Health, Xuzhou Medical College, 209 Tong-Shan Road, Xuzhou, Jiangsu, 221002, China.	pyrethroids		Chemosphere	Chemosphere
27167774	Trialkyltin Rexinoid-X Receptor Agonists Selectively Potentiate Thyroid Hormone Induced Programs of Xenopus laevis Metamorphosis.	Mengeling, BJ; Murk, AJ; Furlow, JD	2016	Y	RXR interaction	Department of Neurobiology, Physiology and Behavior (B.J.M., J.D.F.), University of California Davis, Davis, California 95695; and Marine Animal Ecology Group (A.J.M.), Wageningen University, 6700 AH Wageningen, The Netherlands.	trialkyltins		Endocrinology	Endocrinology
27413107	Embryonic Atrazine Exposure Elicits Alterations in Genes Associated with Neuroendocrine Function in Adult Male Zebrafish.	Wirbisky, SE; Sepúlveda, MS; Weber, GJ; Jannasch, AS; Horzmann, KA; Freeman, JL	2016	Y	atrazine	*School of Health Sciences, Purdue University, Indiana 47907.	triazine		Toxicological sciences : an official journal of the Society of Toxicology	Toxicol Sci
28869887	Chronic toxicity of 1,3,5-triazine herbicides in the postembryonic development of the western clawed frog Silurana tropicalis.	Saka, M; Tada, N; Kamata, Y	2018	Y	Herbicides (ametryn, prometryn, dimethametryn, simazine, atrazine, propazine, and cyanazine)	Division of Aquatic Environment, Kyoto Prefectural Institute of Public Health and Environment, Murakamicho 395, Fushimi-ku, Kyoto 612-8369, Japan. Electronic address: m-saka66@pref.kyoto.lg.jp.	triazine		Ecotoxicology and environmental safety	Ecotoxicol Environ Saf
26590868	Exposure to difenoconazole causes changes of thyroid hormone and gene expression levels in zebrafish larvae.	Liang, X; Yu, L; Gui, W; Zhu, G	2015	Y	Fungicide	Institute of Pesticide and Environmental Toxicology, Zhejiang University, Hangzhou 310058, PR China. Electronic address: liangxiaozju@126.com.	Triazol		Environmental toxicology and pharmacology	Environ Toxicol Pharmacol
29903322	[The change of cancer-related genes expression profile in Nthy-ori-3-1 cell induced by the pesticide amitrole].	Pan, H; Xuan, Q; Han, D; Yin, J; Wu, S; Wang, Q	2016	Y	amitrole gene expression	School of Public Health, Department of Nutrition and Food Science, Kunming Medical University, Kunming 650500, China.	triazole-derivative		Wei sheng yan jiu = Journal of hygiene research	Wei Sheng Yan Jiu
27347635	A predictive data-driven framework for endocrine prioritization: a triazole fungicide case study	Paul Friedman, K; Papineni, S; Marty, MS; Yi, KD; Goetz, AK; Rasoulpour, RJ; Kwiatkowski, P; Wolf, DC; Blacker, AM; Peffer, RC	2016	Y	fungicide	a Human Safety, Bayer CropScience LP, Research Triangle Park , NC , USA ;	triazole-derivative		Critical reviews in toxicology	Crit Rev Toxicol
27289584	Waterborne exposure to triadimefon causes thyroid endocrine disruption and developmental delay in Xenopus laevis tadpoles	Li, M; Li, S; Yao, T; Zhao, R; Wang, Q; Zhu, G	2016	Y	Triadimefon	Institute of Pesticide and Environmental Toxicology, Zhejiang University, Hangzhou 310058, PR China.	triazole-derivative		Aquatic toxicology (Amsterdam, Netherlands)	Aquat Toxicol
29316522	Joint toxic effects of triazophos and imidacloprid on zebrafish (Danio rerio).	Wu, S; Li, X; Liu, X; Yang, G; An, X; Wang, Q; Wang, Y	2018	Y	Mixture	State Key Laboratory Breeding Base for Zhejiang Sustainable Pest and Disease Control, Key Laboratory for Pesticide Residue Detection of Ministry of Agriculture, Laboratory (Hangzhou) for Risk Assessment of Agricultural Products of Ministry of Agriculture, Institute of Quality and Standard for Agro-products, Zhejiang Academy of Agricultural Sciences, Hangzhou 310021, Zhejiang, China.	triazophos : organophosphate - imidacloprid: neonicotinoid		Environmental pollution (Barking, Essex : 1987)	Environ Pollut
28781899	The effect of Tributyltin on thyroid follicular cells of adult male albino rats and the possible protective role of green tea: a toxicological, histological and biochemical study.	Badr El Dine, FMM; Nabil, IM; Dwedar, FI	2017	Y	Protective effects	Departments of Forensic Medicine and Clinical Toxicology, Faculty of Medicine, Alexandria University, Champollion Street, El- Khartoum Square, Azarita Medical Campus, Alexandria, Egypt.	Tributyltin		Egyptian journal of forensic sciences	Egypt J Forensic Sci
29762675	RXR Ligands Modulate Thyroid Hormone Signaling Competence in Young Xenopus laevis Tadpoles.	Mengeling, BJ; Goodson, ML; Furlow, JD	2018	Y	RXR interaction	Department of Neurobiology, Physiology and Behavior, College of Biological Sciences, University of California, Davis, Davis, California.	tributyltin		Endocrinology	Endocrinology
29902746	The environmental contaminant tributyltin leads to abnormalities in different levels of the hypothalamus-pituitary-thyroid axis in female rats.	Andrade, MN; Santos-Silva, AP; Rodrigues-Pereira, P; Paiva-Melo, FD; de Lima Junior, NC; Teixeira, MP; Soares, P; Dias, GRM; Graceli, JB; de Carvalho, DP; Ferreira, ACF; Miranda-Alves, L	2018	Y	RXR interaction	Grupo de Pesquisa, Desenvolvimento e Inovação em Endocrinologia Experimental-GPDIEEx, Instituto de Ciências Biomédicas, Universidade Federal do Rio de Janeiro, Brazil; Programa de Pós-graduação em Endocrinologia, Faculdade de Medicina, Universidade Federal do Rio de Janeiro, Brazil; Programa de Pós-graduação em Farmacologia e Química Medicinal, Instituto de Ciências Biomédicas, Universidade Feder…	tributyltin		Environmental pollution (Barking, Essex : 1987)	Environ Pollut
25101840	Disruption of thyroid hormone functions by low dose exposure of tributyltin: an in vitro and in vivo approach.	Sharan, S; Nikhil, K; Roy, P	2014	Y	pesticide	Molecular Endocrinology Laboratory, Department of Biotechnology, Indian Institute of Technology Roorkee, Roorkee 247 667, Uttarakhand, India.	trioorganotins		General and comparative endocrinology	Gen Comp Endocrinol
25707858	Mode of action and human relevance of pronamide-induced rat thyroid tumors.	Papineni, S; Marty, MS; Rasoulpour, RJ; LeBaron, MJ; Pottenger, LH; Eisenbrandt, DL	2015	N	Cancer	Dow AgroSciences, LLC, Indianapolis, IN 46268, USA. Electronic address: SPapineni@dow.com.	benzamides		Regulatory toxicology and pharmacology : RTP	Regul Toxicol Pharmacol
25893814	[Disseminated cysticercosis: report of three cases in Togo].	Mouhari-Toure, A; N'Timon, B; Kumako, V; Darre, T; Saka, B; Tchaou, M; Amegbor, K; Kombate, K; Balogou, AA; Pitche, P	2015	N	Off-target	CHU-Kara, Kara, Togo, ambatoure@gmail.com.	carbamate		Bulletin de la Societe de pathologie exotique (1990)	Bull Soc Pathol Exot
25476894	Phase I study of XL281 (BMS-908662), a potent oral RAF kinase inhibitor, in patients with advanced solid tumors.	Dickson, MA; Gordon, MS; Edelman, G; Bendell, JC; Kudchadkar, RR; LoRusso, PM; Johnston, SH; Clary, DO; Schwartz, GK	2015	N	Cancer	Memorial Sloan Kettering Cancer Center, New York, NY, USA, dicksonm@mskcc.org.	carbamate		Investigational new drugs	Invest New Drugs
26895214	Antioxidant therapy improves non-thyroidal illness syndrome in uremic rats.	Yang, P; Li, Y; Xu, G	2016	N	Off-target	a Department of Nephrology, Second Affiliated Hospital , Nanchang University , Nanchang , China ;	carbamate		Renal failure	Ren Fail
28040834	Aldehyde dehydrogenase activity plays no functional role in stem cell-like properties in anaplastic thyroid cancer cell lines.	Shimamura, M; Kurashige, T; Mitsutake, N; Nagayama, Y	2017	N	Cancer	Department of Molecular Medicine, Atomic Bomb Disease Institute, Nagasaki University, 1-12-4 Sakamoto, Nagasaki, 852-8523, Japan.	carbamate		Endocrine	Endocrine
29420875	An uncommon manifestation of a common disease	Dsilva, G; Kulkarni, V; Aher, S	2017	N	Off-target	Department of Medicine, Topiwala National Medical College and B.Y.L. Nair Ch. Hospital, Mumbai-400 008, India	carbamate		Annals of parasitology	Ann Parasitol
29021480	The Effects of Mitiglinide and Repaglinide on Postprandial Hyperglycemia in Patients Undergoing Methylprednisolone Pulse Therapy.	Tanaka, K; Okada, Y; Mori, H; Torimoto, K; Arao, T; Tanaka, Y	2018	N	Not thyroid endpoints	First Department of Internal Medicine, School of Medicine, University of Occupational and Environmental Health, Japan, Japan.	carbamate		Internal medicine (Tokyo, Japan)	Intern Med
30384058	Endpoint sensitivity in Amphibian Metamorphosis Assay.	Dang, Z	2019	N	Essay analysis	National Institute for Public Health and the Environment (RIVM), A. van Leeuwenhoeklaan 9, 3720 BA Bilthoven, The Netherlands. Electronic address: zhichao.dang@rivm.nl.	carbamate		Ecotoxicology and environmental safety	Ecotoxicol Environ Saf
24530523	Current concepts in neuroendocrine disruption.	León-Olea, M; Martyniuk, CJ; Orlando, EF; Ottinger, MA; Rosenfeld, C; Wolstenholme, J; Trudeau, VL	2014	N	Too broad	Departamento de Neuromorfología Funcional, Dirección de Investigaciones en Neurociencias, Instituto Nacional de Psiquiatría, R.F.M., México D.F., México.	Compilation		General and comparative endocrinology	Gen Comp Endocrinol
26544531	EDC-2: The Endocrine Society's Second Scientific Statement on Endocrine-Disrupting Chemicals.	Gore, AC; Chappell, VA; Fenton, SE; Flaws, JA; Nadal, A; Prins, GS; Toppari, J; Zoeller, RT	2015	N	Too broad	Pharmacology and Toxicology (A.C.G.), College of Pharmacy, The University of Texas at Austin, Austin, Texas 78734; Division of the National Toxicology Program (V.A.C., S.E.F.), National Institute of Environmental Health Sciences, National Institutes of Health, Research Triangle Park, North Carolina 27709; Department of Comparative Biosciences (J.A.F.), University of Illinois at Urbana-Champaign, …	Compilation		Endocrine reviews	Endocr Rev
26414233	Executive Summary to EDC-2: The Endocrine Society's Second Scientific Statement on Endocrine-Disrupting Chemicals	Gore, AC; Chappell, VA; Fenton, SE; Flaws, JA; Nadal, A; Prins, GS; Toppari, J; Zoeller, RT	2015	N	Too broad	Pharmacology and Toxicology (A.C.G.), College of Pharmacy, The University of Texas at Austin, Austin, Texas 78734; Division of the National Toxicology Program (V.A.C., S.E.F.), National Institute of Environmental Health Sciences, National Institutes of Health, Research Triangle Park, North Carolina 27709; Department of Comparative Biosciences (J.A.F.), University of Illinois at Urbana-Champaign, …	Compilation		Endocrine reviews	Endocr Rev
25647813	The influence of organophosphate and carbamate on sperm chromatin and reproductive hormones among pesticide sprayers.	Jamal, F; Haque, QS; Singh, S; Rastogi, SK	2016	N	Retracted	Department of Biochemistry, Dr. Ram Manohar Lohia Avadh University, Faizabad, Uttar Pradesh, India journal.farrukh@gmail.com.	Compilation		Toxicology and industrial health	Toxicol Ind Health
26879462	How well can in vitro data predict in vivo effects of chemicals? Rodent carcinogenicity as a case study.	Anthony Tony Cox, L; Popken, DA; Kaplan, AM; Plunkett, LM; Becker, RA	2016	N	Tricky	Cox Associates, 503 Franklin St., Denver, CO, 80218, USA. Electronic address: tcoxdenver@aol.com.	Compilation		Regulatory toxicology and pharmacology : RTP	Regul Toxicol Pharmacol
29078070	Endocrine disruptors affect larval zebrafish behavior: Testing potential mechanisms and comparisons of behavioral sensitivity to alternative biomarkers.	Fraser, TWK; Khezri, A; Lewandowska-Sabat, AM; Henry, T; Ropstad, E	2017	N	No good	Department of Production Animal Clinical Sciences, Faculty of Veterinary Medicine, Norwegian University of Life Sciences, Oslo, Norway. Electronic address: thomas.fraser@nmbu.no.	Compilation		Aquatic toxicology (Amsterdam, Netherlands)	Aquat Toxicol
28640454	Direct quantification of gamma H2AX by cell-based high throughput screening for evaluation of genotoxicity of pesticides in a human thyroid cell lines.	Hershman, JM; France, B; Hon, K; Damoiseaux, R	2017	N	High dosis	West Los Angeles VA Medical Center, David Geffen School of Medicine at UCLA, Los Angeles, California.	Compilation		Environmental and molecular mutagenesis	Environ Mol Mutagen
29489035	Pesticides as risk factors for head and neck cancer: A review.	Brasil, VLM; Ramos Pinto, MB; Bonan, RF; Kowalski, LP; da Cruz Perez, DE	2018	N	Cancer - Limited evidence	Oral Pathology Section, Department of Clinical and Preventive Dentistry, School of Dentistry, Universidade Federal de Pernambuco, Recife, Pernambuco, Brazil.	Compilation		Journal of oral pathology & medicine : official publication of the International Association of Oral Pathologists and the American Academy of Oral Pathology	J Oral Pathol Med
29233028	Therapeutic effects of oral liothyronine on aluminum phosphide poisoning as an adjuvant therapy: A clinical trial.	Goharbari, MH; Taghaddosinejad, F; Arefi, M; Sharifzadeh, M; Mojtahedzadeh, M; Nikfar, S; Baeeri, M; Rahimifard, M; Abdollahi, M	2018	N	Off-target	1 Department of Toxicology and Pharmacology, Faculty of Pharmacy, Tehran University of Medical Sciences, Tehran, Iran.	Compilation		Human & experimental toxicology	Hum Exp Toxicol
30826616	High-throughput screening and chemotype-enrichment analysis of ToxCast phase II chemicals evaluated for human sodium-iodide symporter (NIS) inhibition.	Wang, J; Hallinger, DR; Murr, AS; Buckalew, AR; Lougee, RR; Richard, AM; Laws, SC; Stoker, TE	2019	N	Off-target	Endocrine Toxicology Branch, Toxicity Assessment Division, National Health and Environmental Effects Research Laboratory, Office of Research and Development, U.S. Environmental Protection Agency, Research Triangle Park, NC, 27711, USA; Oak Ridge Institute for Science and Education, U.S. Department of Energy, Oak Ridge, TN 37831, USA.	Compilation		Environment international	Environ Int
30362975	Persistent organic pollutants, pesticides, and the risk of thyroid cancer: systematic review and meta-analysis.	Han, MA; Kim, JH; Song, HS	2018	N	Cancer	Departments of Preventive Medicine.	Compilation (Persistent organic pollutants)		European journal of cancer prevention : the official journal of the European Cancer Prevention Organisation (ECP)	Eur J Cancer Prev
25683035	Triorganotin compounds--ligands for "rexinoid" inducible transcription factors: biological effects.	Brtko, J; Dvorak, Z	2015	N	RXR interaction	Laboratory of Molecular Endocrinology, Institute of Experimental Endocrinology, Slovak Academy of Sciences, Vlarska 3, 83306 Bratislava, Slovak Republic. Electronic address: julius.brtko@savba.sk.	engorganometallic compounds		Toxicology letters	Toxicol Lett
25455223	Thyroid tumor formation in the male mouse induced by fluopyram is mediated by activation of hepatic CAR/PXR nuclear receptors.	Rouquié, D; Tinwell, H; Blanck, O; Schorsch, F; Geter, D; Wason, S; Bars, R	2014	N	Cancer	Bayer SAS, Bayer CropScience, 355 rue Dostoïevski, CS 90153, 06906 Sophia Antipolis, France. Electronic address: david.rouquie@bayer.com.	Fluopyram		Regulatory toxicology and pharmacology : RTP	Regul Toxicol Pharmacol
27677669	Glyphosate rodent carcinogenicity bioassay expert panel review.	Williams, GM; Berry, C; Burns, M; de Camargo, JLV; Greim, H	2016	N	Cancer	a New York Medical College , Valhalla , NY , USA.	Glyphosate-based		Critical reviews in toxicology	Crit Rev Toxicol
30802040	Toxicokinetics of Imidacloprid-Coated Wheat Seeds in Japanese Quail ( Coturnix japonica) and an Evaluation of Hazard.	Bean, TG; Gross, MS; Karouna-Renier, NK; Henry, PFP; Schultz, SL; Hladik, ML; Kuivila, KM; Rattner, BA	2019	N	Not thyroid endpoints	Department of Environmental Science and Technology , University of Maryland , College Park , Maryland 20742 , United States.	neonicotinoid		Environmental science & technology	Environ Sci Technol
30215082	2D europium coordination polymer as a regenerable fluorescence probe for efficiently detecting fipronil.	Yang, SL; Lu, JN; Zhang, SJ; Zhang, CX; Wang, QL	2018	N	pesticide detection essay	College of Chemical Engineering and Materials Science, Tianjin University of Science and Technology, Tianjin 300457, P. R. China. zcx@tust.edu.cn.	Not accurate		The Analyst	Analyst
24518186	A case of calciphylaxis in a patient with hypoparathyroidism and normal renal function.	Erdel, BL; Juneja, R; Evans-Molina, C	2014	N	Off-target	Department of Medicine, Indiana University School of Medicine, Indianapolis, Indiana.	Not accurate		Endocrine practice : official journal of the American College of Endocrinology and the American Association of Clinical Endocrinologists	Endocr Pract
25349184	Amiodarone-induced thyrotoxicosis: type 1 or type 2?	Khan, A; Puttanna, A; Raskauskiene, D	2014	N	Thyroid toxicosis	Walsall Hospitals Healthcare NHS Trust, Walsall, UK.	Not accurate		BMJ case reports	BMJ Case Rep
24913218	An evaluation of the potential drug interaction between warfarin and levothyroxine.	Wood, MD; Delate, T; Clark, M; Clark, N; Horn, JR; Witt, DM	2014	N	No thyroid endpoints	Kaiser Permanente Colorado, Aurora, CO, USA.	Not accurate		Journal of thrombosis and haemostasis : JTH	J Thromb Haemost
24712661	Discovery of 2-[3,5-dichloro-4-(5-isopropyl-6-oxo-1,6-dihydropyridazin-3-yloxy)phenyl]-3,5-dioxo-2,3,4,5-tetrahydro[1,2,4]triazine-6-carbonitrile (MGL-3196), a Highly Selective Thyroid Hormone Receptor β agonist in clinical trials for the treatment of dyslipidemia.	Kelly, MJ; Pietranico-Cole, S; Larigan, JD; Haynes, NE; Reynolds, CH; Scott, N; Vermeulen, J; Dvorozniak, M; Conde-Knape, K; Huang, KS; So, SS; Thakkar, K; Qian, Y; Banner, B; Mennona, F; Danzi, S; Klein, I; Taub, R; Tilley, J	2014	N	Off-target	Madrigal Pharmaceuticals, Inc. , Fort Washington, Pennsylvania 19034, United States.	Not accurate		Journal of medicinal chemistry	J Med Chem
24892251	Physiologic and metabolic safety of butyrylcholinesterase gene therapy in mice.	Murthy, V; Gao, Y; Geng, L; LeBrasseur, NK; White, TA; Parks, RJ; Brimijoin, S	2014	N	Off-target	Department of Molecular Pharmacology and Experimental Therapeutics, Mayo Clinic, Rochester, MN 55905, USA; Robert and Arlene Kogod Center on Aging, Mayo Clinic, Rochester, MN 55905, USA. Electronic address: Murthy.Vishakantha@mayo.edu.	Not accurate		Vaccine	Vaccine
24761821	Prescriber perceptions of a near real-time fax alert program for potential drug-drug interactions.	Armstrong, EP; Wang, SM; Hines, LE; Patel, BV; Leslie, RS; Malone, DC	2014	N	Not thyroid endpoints	College of Pharmacy, University of Arizona, Tucson, AZ 85721. armstrong@pharmacy.arizona.edu.	Not accurate		Journal of managed care & specialty pharmacy	J Manag Care Spec Pharm
24830592	Effects of endocrine disruptors in the development of the female reproductive tract.	Costa, EM; Spritzer, PM; Hohl, A; Bachega, TA	2014	N	Not thyroid related	Unidade de Endocrinologia do Desenvolvimento, Laboratório de Hormônios e Genética Molecular LIM42, Hospital das Clínicas, Faculdade de Medicina da Universidade de São Paulo, São Paulo, SP, Brazil.	Not accurate		Arquivos brasileiros de endocrinologia e metabologia	Arq Bras Endocrinol Metabol
24604144	Occupation and thyroid cancer.	Aschebrook-Kilfoy, B; Ward, MH; Della Valle, CT; Friesen, MC	2014	N	Cancer	Department of Health Studies, University of Chicago, Chicago, Illinois, USA.	Not accurate		Occupational and environmental medicine	Occup Environ Med
25754167	A difficult diagnosis: severe Graves' ophthalmolopathy.	Yip, IY; Mushtaq, F; Reuser, T	2015	N	Off-target	Department of Ophthalmology, Heart of England NHS Trust, Birmingham, UK.	Not accurate		BMJ case reports	BMJ Case Rep
26683953	Association Between Chronic Hepatitis B Virus Infection and Risk of Osteoporosis: A Nationwide Population-Based Study.	Chen, CH; Lin, CL; Kao, CH	2015	N	Off-target	From the Digestive Disease Center, Show-Chwan Memorial Hospital, Changhua (C-HC), Hungkuang University, Taichung (C-HC), Meiho University of Technology, Pingtung (C-HC), Management Office for Health Data, China Medical University Hospital (C-LL), College of Medicine (C-LL), Graduate Institute of Clinical Medical Science and School of Medicine, College of Medicine, China Medical University (C-HK);…	Not accurate		Medicine	Medicine (Baltimore)
25905496	Correlation Between Home INR and Core Laboratory INR in Patients Supported with Continuous-Flow Left Ventricular Assist Devices.	Dionizovik-Dimanovski, M; Levin, AP; Fried, J; Mody, KP; Simonich, E; Garan, AR; Yuzefpolskaya, M; Takayama, H; Naka, Y; Colombo, PC; Kalesan, B; Uriel, N; Jorde, UP	2015	N		From the *Division of Cardiology, Department of Medicine, Columbia University Medical Center, New York, New York; †Department of Surgery, Columbia University Medical Center, New York, New York; ‡Department of Epidemiology, Columbia University Medical Center, New York, New York; and §Division of Cardiology, Department of Medicine, University of Chicago, Chicago, Illinois.	Not accurate		ASAIO journal (American Society for Artificial Internal Organs : 1992)	ASAIO J
25901270	Lung Perfusion SPECT: Application in a Patient With Tetralogy of Fallot and Suspected Pulmonary Thromboemboli.	Ranji Amjad, M; Abbasi, M; Farzanehfar, S	2015	N	Off-target	Research Institute for Nuclear Medicine, Shariati Hospital, Tehran University of Medical Sciences, Tehran, Iran.	Not accurate		Iranian journal of radiology : a quarterly journal published by the Iranian Radiological Society	Iran J Radiol
25680979	A 46-Year-Old Woman With Dyspnea From an Inhalational Exposure, Triggering Thyroid Storm and Subsequent Multi-Organ System Failure.	Moraco, AH; Banauch, G; Kopec, S	2015	N	Clinical case	UMass Memorial Medical Center, Department of Pulmonary, Allergy and Critical Care, Worcester, MA, USA andrewmoraco@gmail.com.	Not accurate		Journal of intensive care medicine	J Intensive Care Med
25564013	Sensitivity of animals to chemical compounds links to metabolic rate.	Baas, J; Kooijman, SA	2015	N	No thyroid endpoints	Centre Ecology and Hydrology, MacLean Building Benson Lane, Wallingford, Oxfordshire, OX10 8BB, UK, janbaa@ceh.ac.uk.	Not accurate		Ecotoxicology (London, England)	Ecotoxicology
26666467	Artificial neural network-based pharmacogenomic algorithm for warfarin dose optimization.	Pavani, A; Naushad, SM; Kumar, RM; Srinath, M; Malempati, AR; Kutala, VK	2016	N	Off-target	Department of Clinical Pharmacology & Therapeutics, Nizam's Institute of Medical Sciences, Hyderabad 500082, India.	Not accurate		Pharmacogenomics	Pharmacogenomics
27482386	Deep vein thrombosis, an unreported first manifestation of polyglandular autoimmune syndrome type III.	Horsey, M; Hogan, P; Oliver, T	2016	N	Off-target	Georgetown University School of Medicine , Washington, District of Columbia , USA.	Not accurate		Endocrinology, diabetes & metabolism case reports	Endocrinol Diabetes Metab Case Rep
26614792	Effect of Anticoagulation Medication on the Thyroid Fine-Needle Aspiration Pathologic Diagnostic Sufficiency Rate.	Denham, SL; Ismail, A; Bolus, DN; Lockhart, ME	2016	N	Off-target	Department of Radiology, University of Alabama at Birmingham, Birmingham, Alabama, USA. ldenham@uabmc.edu.	Not accurate		Journal of ultrasound in medicine : official journal of the American Institute of Ultrasound in Medicine	J Ultrasound Med
26695107	Effect of diseases on response to vitamin K antagonists.	Self, TH; Owens, RE; Sakaan, SA; Wallace, JL; Sands, CW; Howard-Thompson, A	2016	N	Vitamin K	a Methodist University Hospital, Clinical Pharmacist , Memphis , TN , USA ;	Not accurate		Current medical research and opinion	Curr Med Res Opin
27499793	Incidence rate and pattern of clinically relevant potential drug-drug interactions in a large outpatient population of a developing country.	Nabovati, E; Vakili-Arki, H; Taherzadeh, Z; Saberi, MR; Abu-Hanna, A; Eslami, S	2016	N	Not thyroid endpoints	Student Research Committee, Department of Medical Informatics, Faculty of Medicine, Mashhad University of Medical Sciences, Mashhad, I.R. Iran.	Not accurate		Research in pharmaceutical sciences	Res Pharm Sci
28261644	Liquid Chromatography-Mass Spectrometry/Mass Spectrometry Analysis and Pharmacokinetic Assessment of Ponatinib in Sprague-Dawley Rats.	Wang, P; Peng, Y; Zhang, X; Fei, F; Wang, S; Feng, S; Huang, J; Wang, H; Aa, J; Wang, G	2016	N	Pesticide detection essay	Jiangsu Province Key Laboratory of Drug Metabolism and Pharmacokinetics, Jiangsu Key Laboratory of Drug Design and Optimization, China Pharmaceutical University, Nanjing, China.	Not accurate		Oncology and therapy	Oncol Ther
29016085	Prompt diagnosis of AF lowers risk of complications.	Leo, M; Betts, T	2016	N	Off-target		Not accurate		The Practitioner	Practitioner
27182616	The effect of CYP2C9 and VKORC1 genetic polymorphisms on warfarin dose requirements in a pediatric population.	Dilge Taşkın, B; Kula, S; Ergün, MA; Altun, D; Olguntürk, R; Tunaoğlu, FS; Oğuz, AD; Gürsel, T	2016	N	Children	Department of Pediatric Neurology, Ankara Children's Hematology Oncology Training and Research Hospital, Ankara-Turkey.	Not accurate		Anatolian journal of cardiology	Anatol J Cardiol
27872699	The effects of fenvalerate on hepatic and cerebral xenobiotic metabolizing enzymes in selenium and/or iodine deficient rats.	Caglayan, A; Kocer-Gumusel, B; Erkekoglu, P; Hincal, F	2016	N	Not thyroid endpoints	Hacettepe University, Faculty of Pharmacy, Department of Toxicology, Ankara 06100 Turkey.	Not accurate		Iranian journal of basic medical sciences	Iran J Basic Med Sci
27052045	Use of anticoagulation in thyroid disease.	Polmear, JL; Hare, MJ; Catford, SR; Topliss, DJ; Dooley, MJ	2016	N	Off-target		Not accurate		Australian family physician	Aust Fam Physician
27331295	Epidemiological trends of hormone-related cancers in Slovenia.	Zadnik, V; Krajc, M	2016	N	Cancer		Not accurate		Arhiv za higijenu rada i toksikologiju	Arh Hig Rada Toksikol
28612237	Assessment of the Impact of L-Thyroxine Therapy on Bleeding Risk in Patients Receiving Vitamin K Antagonists.	Moustafa, F; Malhomme, R; Pereira, B; Barres, A; Saint-Denis, J; Dutheil, F; Batisse, M; Schmidt, J	2017	N	Off-target	Emergency Department, Clermont-Ferrand University Hospital, 58 Rue Montalembert, 63003, Clermont-Ferrand, France. fmoustafa@chu-clermontferrand.fr.	Not accurate		Clinical drug investigation	Clin Drug Investig
29117154	BRAFV600E and RET/PTC Promote Proliferation and Migration of Papillary Thyroid Carcinoma Cells In Vitro by Regulating Nuclear Factor-κB.	Zhou, D; Li, Z; Bai, X	2017	N	Cancer	Department of General Surgery, Zhujiang Hospital, Southern Medical University, Guangzhou, Guangdong, China (mainland).	Not accurate		Medical science monitor : international medical journal of experimental and clinical research	Med Sci Monit
28941600	Comparison of Mortality and Nonfatal Cardiovascular Events in Adults With Atrial Fibrillation With Versus Without Levothyroxine Treatment.	Wändell, P; Carlsson, AC; Holzmann, MJ; Ärnlöv, J; Sundquist, J; Sundquist, K	2017	N	Offtarget	Division of Family Medicine and Primary Care, Department of Neurobiology, Care Science and Society, Karolinska Institutet, Huddinge, Sweden. Electronic address: per.wandell@ki.se.	Not accurate		The American journal of cardiology	Am J Cardiol
28474439	Estimating medication stopping fraction and real-time prevalence of drug use in pharmaco-epidemiologic databases. An application of the reverse waiting time distribution.	Støvring, H; Pottegård, A; Hallas, J	2017	N	Off-target	Biostatistics, Department of Public Health, Aarhus University, Aarhus, Denmark.	Not accurate		Pharmacoepidemiology and drug safety	Pharmacoepidemiol Drug Saf
28250654	Insulin Plant (Costus pictus) Extract Restores Thyroid Hormone Levels in Experimental Hypothyroidism.	Ashwini, S; Bobby, Z; Sridhar, MG; Cleetus, CC	2017	N	Off-target	Department of Biochemistry, Jawaharlal Institute of Postgraduate Medical Education and Research, Puducherry, India.	Not accurate		Pharmacognosy research	Pharmacognosy Res
28976876	Parathyroidectomy in Hyperparathyroidism-Associated Calciphylaxis in End-Stage Renal Disease Should be Prompt and Radical - a Case Report with Two Original Therapeutic Modifications and Successful Outcome.	Dusilová Sulková, S; Horáček, J; Vykoukalová, E; Šafránek, R; Malá, A; Palička, V	2017	N	Clinical case	Academic Department of Internal Medicine, Charles University, Faculty of Medicine in Hradec Králové, Czech Republic. sulkovas@lfhk.cuni.cz.	Not accurate		Acta medica (Hradec Kralove)	Acta Medica (Hradec Kralove)
28243434	Spontaneous Thyroid Hemorrhage on Chronic Anticoagulation Therapy.	Gunasekaran, K; Rudd, KM; Murthi, S; Kaatz, S; Lone, N	2017	N	Off-target	Department of Internal Medicine, Bassett Medical Center, Cooperstown, NY, USA; Division of Hospital Medicine, Henry Ford Hospital, Detroit, MI, USA.	Not accurate		Clinics and practice	Clin Pract
30318433	[Autoimmune-related bleeding occurring during combined immunotherapy for lung cancer - Case report].	Eberst, G; Lakhzoum, W; Tomasini, P; Andreotti, N; Abcaya, J; Mascaux, C; Barlesi, F	2018	N	Clinic case	Université d'Aix-Marseille, Assistance publique Hôpitaux de Marseille, centre essais précoces en cancérologie de Marseille CLIP2, hôpital La Timone, boulevard Saint-Pierre, 13005 Marseille, France.	Not accurate		Revue des maladies respiratoires	Rev Mal Respir
29871608	A case-control study of exposure to organophosphate flame retardants and risk of thyroid cancer in women.	Deziel, NC; Yi, H; Stapleton, HM; Huang, H; Zhao, N; Zhang, Y	2018	N	Flame retardant	Department of Environmental Health Sciences, Yale School of Public Health, 60 College St, New Haven, CT, 06520, USA. nicole.deziel@yale.edu.	Not accurate		BMC cancer	BMC Cancer
29621713	Analysis of endocrine activity in drinking water, surface water and treated wastewater from six countries.	Leusch, FDL; Neale, PA; Arnal, C; Aneck-Hahn, NH; Balaguer, P; Bruchet, A; Escher, BI; Esperanza, M; Grimaldi, M; Leroy, G; Scheurer, M; Schlichting, R; Schriks, M; Hebert, A	2018	N	No thyroid endpoints	Australian Rivers Institute, School of Environment and Science, Griffith University, Southport QLD 4222, Australia. Electronic address: f.leusch@griffith.edu.au.	Not accurate		Water research	Water Res
30023344	Aspirin Increases the Risk of Nondiagnostic Yield of Fine-Needle Aspiration and Biopsy of Thyroid Nodules.	Khan, TS; Sharma, E; Singh, B; Jammu, B; Chadha, A; Markanday, D; Wu, YY; Bajaj, HS	2018	N	Off-target	Division of Endocrinology and Metabolism, McMaster University, Hamilton, Ontario, Canada.	Not accurate		European thyroid journal	Eur Thyroid J
30106422	Bilateral adrenal hemorrhage in antiphospholipid syndrome. Anticoagulation for the treatment of hemorrhage.	Aldaajani, H; Albahrani, S; Saleh, K; Alghanim, K	2018	N	Off-target	Department of Internal Medicine, King Fahad Military Medical Complex, Dhahran, Kingdom of Saudi Arabia. E-mail. hano.ibrahim@gmail.com.	Not accurate		Saudi medical journal	Saudi Med J
29621670	Characterization and comparison of transcriptional activities of the retinoid X receptors by various organotin compounds in three prosobranch gastropods; Thais clavigera, Nucella lapillus and Babylonia japonica.	Urushitani, H; Katsu, Y; Kagechika, H; Sousa, ACA; Barroso, CM; Ohta, Y; Shiraishi, H; Iguchi, T; Horiguchi, T	2018	N	No thyroid endpoints	Center for Health and Environmental Risk Research, National Institute for Environmental Studies, 16-2 Onogawa, Tsukuba, Ibaraki, 305-8506, Japan.	Not accurate		Aquatic toxicology (Amsterdam, Netherlands)	Aquat Toxicol
30429148	Compliance with pathology testing guidelines in Australian general practice: protocol for a secondary analysis of electronic health record data.	Sezgin, G; Georgiou, A; Hardie, RA; Li, L; Pont, LG; Badrick, T; Franco, GS; Westbrook, JI; Rinehart, N; McLeod, A; Pearce, C; Shearer, M; Whyte, R; Deveny, E	2018	N	Off-target	Centre for Health Systems and Safety Research, Australian Institute of Health Innovation, Macquarie University, Sydney, New South Wales, Australia.	Not accurate		BMJ open	BMJ Open
29969159	Do anticoagulation medications increase the risk of haematoma in ultrasound-guided fine needle aspiration of thyroid lesions?	Khadra, H; Kholmatov, R; Monlezun, D; Kandil, E	2018	N	No thyroid endpoints	Division of Endocrine and Oncologic Surgery, Department of Surgery, Tulane University School of Medicine, New Orleans, Louisiana, USA.	Not accurate		Cytopathology : official journal of the British Society for Clinical Cytology	Cytopathology
30070343	Interaction study between antiplatelet agents, anticoagulants, thyroid replacement therapy and a bioavailable formulation of curcumin (Meriva®).	Hu, S; Belcaro, G; Dugall, M; Peterzan, P; Hosoi, M; Ledda, A; Riva, A; Giacomelli, L; Togni, S; Eggenhoffner, R; Cotellese, R	2018	N	Off-target	Department of Medicine and Biotechnological Sciences Biomedical Science, Irvine 3 Labs, Circulation Sciences, Chieti-Pescara University, Chieti-Pescara, Italy. cardres@abol.it.	Not accurate		European review for medical and pharmacological sciences	Eur Rev Med Pharmacol Sci
29677534	Punicalagin induces senescent growth arrest in human papillary thyroid carcinoma BCPAP cells via NF-κB signaling pathway.	Cheng, X; Yao, X; Xu, S; Pan, J; Yu, H; Bao, J; Guan, H; Lu, R; Zhang, L	2018	N	Cancer	Key Laboratory of Nuclear Medicine, Ministry of Health, Jiangsu Key Laboratory of Molecular Nuclear Medicine, Jiangsu Institute of Nuclear Medicine, Wuxi, Jiangsu, China.	Not accurate		Biomedicine & pharmacotherapy = Biomedecine & pharmacotherapie	Biomed Pharmacother
29710015	[Effect of the Metabolic Modification of Environmental Chemicals on Endocrine-disrupting Activity].	Kitamura, S	2018	N	Japanes	Nihon Pharmaceutical University.	Not accurate		Yakugaku zasshi : Journal of the Pharmaceutical Society of Japan	Yakugaku Zasshi
29427707	Assessment of endocrine disruption and oxidative potential of bisphenol-A, triclosan, nonylphenol, diethylhexyl phthalate, galaxolide, and carbamazepine, common contaminants of municipal biosolids.	Cavanagh, JE; Trought, K; Mitchell, C; Northcott, G; Tremblay, LA	2018	N	Off-target	Landcare Research, PO Box 40, Lincoln, New Zealand. Electronic address: cavanaghj@landcareresearch.co.nz.	Not accurate		Toxicology in vitro : an international journal published in association with BIBRA	Toxicol In Vitro
29786585	Hygienic assessment of the effects of pesticides application on adult population morbidity with thyroid gland diseases.	Antonenko, AM; Vavrinevych, OP; Korshun, MM; Omelchuk, ST	2018	N	Bad written	Hygiene And Ecology Institute, Bogomolets National Medical University, Kyiv, Ukraine.	Not accurate		Wiadomosci lekarskie (Warsaw, Poland : 1960)	Wiad Lek
30621213	A Toxicogenomic Approach Reveals a Novel Gene Regulatory Network Active in In Vitro and In Vivo Models of Thyroid Carcinogenesis.	Reale, C; Russo, F; Credendino, SC; Cuomo, D; De Vita, G; Mallardo, M; Pennino, F; Porreca, I; Triassi, M; De Felice, M; Ambrosino, C	2019	N	Cancer	IRGS, Biogem, Via Camporeale, 83031 Ariano Irpino, Avellino, Italy. carla.reale@biogem.it.	Not accurate		International journal of environmental research and public health	Int J Environ Res Public Health
29477483	Effects of DDT and permethrin on rat hepatocytes cultivated in microfluidic biochips: Metabolomics and gene expression study.	Jellali, R; Zeller, P; Gilard, F; Legendre, A; Fleury, MJ; Jacques, S; Tcherkez, G; Leclerc, E	2018	N	No thyroid endpoints	Sorbonne Universités, Université de Technologie de Compiègne, CNRS, UMR 7338, Biomécanique et Bioingénierie, Centre de Recherche Royallieu, CS 60319, 60203, Compiègne Cedex, France. Electronic address: rachid.jellali@utc.fr.	organohalogen		Environmental toxicology and pharmacology	Environ Toxicol Pharmacol
29268174	Polychlorinated biphenyls, indicators of thyroid function and thyroid autoantibodies in the Anniston Community Health Survey I (ACHS-I).	Benson, K; Yang, E; Dutton, N; Sjodin, A; Rosenbaum, PF; Pavuk, M	2018	N	PCBs	Agency for Toxic Substances and Disease Registry (ATSDR), Atlanta, GA, USA. Electronic address: yrn0@cdc.gov.	Organohalogen (organochlorine)		Chemosphere	Chemosphere
30759554	Enantioselective thyroid disruption in zebrafish embryo-larvae via exposure to environmental concentrations of the chloroacetamide herbicide acetochlor.	Xu, C; Sun, X; Niu, L; Yang, W; Tu, W; Lu, L; Song, S; Liu, W	2019	N	Not relevant	College of Environment, Zhejiang University of Technology, Hangzhou 310032, China. Electronic address: chaoxu@zjut.edu.cn.	Organohalogen (organochlorine)		The Science of the total environment	Sci Total Environ
24394368	Assessment of concentrations and effects of organohalogen contaminants in a terrestrial passerine, the European starling.	Eng, ML; Williams, TD; Letcher, RJ; Elliott, JE	2014	N	n too small	Department of Biological Sciences, Simon Fraser University, Burnaby, BC V5A 1S6, Canada. Electronic address: mea10@sfu.ca.	organohalogenated pollutants		The Science of the total environment	Sci Total Environ
28545212	Determination of phenolic organohalogens in human serum from a Belgian population and assessment of parameters affecting the human contamination.	Dufour, P; Pirard, C; Charlier, C	2017	N	Pesticide detection test	Laboratory of Clinical, Forensic and Environmental Toxicology, University of Liege (ULg) CHU (B35), 4000, Liege, Belgium; Center for Interdisciplinary Research on Medicines (C.I.R.M.), University of Liege (ULg) CHU (B35), 4000, Liege, Belgium. Electronic address: pdufour@ulg.ac.be.	organohalogens		The Science of the total environment	Sci Total Environ
27187793	Chronic dietary exposure to pesticide residues and associated risk in the French ELFE cohort of pregnant women.	de Gavelle, E; de Lauzon-Guillain, B; Charles, MA; Chevrier, C; Hulin, M; Sirot, V; Merlo, M; Nougadère, A	2016	N	No thyroid endpoints	ANSES - French Agency for Food, Environmental and Occupational Health & Safety, Risk Assessment Department, 14 rue Pierre et Marie Curie, F-94701, Maisons-Alfort Cedex, France. Electronic address: erwan.degavelle@gmail.com.	organophosphate		Environment international	Environ Int
25988605	Investigating endocrine and physiological parameters of captive American kestrels exposed by diet to selected organophosphate flame retardants.	Fernie, KJ; Palace, V; Peters, LE; Basu, N; Letcher, RJ; Karouna-Renier, NK; Schultz, SL; Lazarus, RS; Rattner, BA	2015	N	Flame retardant	‡Stantec Consulting Ltd., 386 Broadway Avenue, Winnipeg, MB, Canada R3C 3R6.	organophosphate		Environmental science & technology	Environ Sci Technol
25646720	Thyroid disruption by triphenyl phosphate, an organophosphate flame retardant, in zebrafish (Danio rerio) embryos/larvae, and in GH3 and FRTL-5 cell lines.	Kim, S; Jung, J; Lee, I; Jung, D; Youn, H; Choi, K	2015	N	Flame retardant	School of Public Health, Seoul National University, Seoul 151-742, Republic of Korea.	organophosphate		Aquatic toxicology (Amsterdam, Netherlands)	Aquat Toxicol
27833725	Prediction of Endocrine System Affectation in Fisher 344 Rats by Food Intake Exposed with Malathion, Applying Naïve Bayes Classifier and Genetic Algorithms.	Mora, JD; Hurtado, DA; Sandoval, OL	2016	N	Not thyroid endpoints	Department of Mechatronics Engineering, Faculty of Engineering, Nueva Granada Military University, Bogotá, Colombia.	organophosphate		International journal of preventive medicine	Int J Prev Med
26184692	Fenitrothion, an organophosphorous insecticide, impairs locomotory function and alters body temperatures in Sminthopsis macroura (Gould 1845) without reducing metabolic rates during running endurance and thermogenic performance tests.	Story, PG; French, K; Astheimer, LB; Buttemer, WA	2016	N	No thyroid endpoints	Australian Plague Locust Commission, Department of Agriculture, Canberra, Australian Capital Territory, Australia.	organophosphate		Environmental toxicology and chemistry	Environ Toxicol Chem
28162782	Associations between urinary diphenyl phosphate and thyroid function.	Preston, EV; McClean, MD; Claus Henn, B; Stapleton, HM; Braverman, LE; Pearce, EN; Makey, CM; Webster, TF	2017	N	Flame retardant - Plasticer	Department of Environmental Health, Boston University School of Public Health, Boston, MA, USA. Electronic address: ejvirgi@bu.edu.	organophosphate		Environment international	Environ Int
30652482	Organophosphate Ester, 2-Ethylhexyl Diphenyl Phosphate (EHDPP), Elicits Cytotoxic and Transcriptomic Effects in Chicken Embryonic Hepatocytes and Its Biotransformation Profile Compared to Humans.	Shen, J; Zhang, Y; Yu, N; Crump, D; Li, J; Su, H; Letcher, RJ; Su, G	2019	N	Not thyroid endpoints	Jiangsu Key Laboratory of Chemical Pollution Control and Resources Reuse, School of Environmental and Biological Engineering , Nanjing University of Science and Technology , Nanjing 210094 , People's Republic of China.	organophosphate		Environmental science & technology	Environ Sci Technol
25425536	Protective role of Nigella sativa oil against reproductive toxicity, hormonal alterations, and oxidative damage induced by chlorpyrifos in male rats.	Mosbah, R; Yousef, MI; Maranghi, F; Mantovani, A	2016	N	Protective effect	Department of Biology, Faculty of Sciences, University of Boumerdes, Algeria.	organophosphate (chlorpyrifos)		Toxicology and industrial health	Toxicol Ind Health
29217167	Potential protective effect of Pistacia lentiscus oil against chlorpyrifos-induced hormonal changes and oxidative damage in ovaries and thyroid of female rats.	Chebab, S; Mekircha, F; Leghouchi, E	2017	N	Protective effect	Département des sciences biologiques de l'environnement, Faculté des Sciences de la Nature et de la Vie, Université de Bejaia, Bejaia, 06000, Algerie; Laboratoire Biotechnologie, Environnement et Santé, Université de Jijel, Jijel, 18000, Algerie. Electronic address: samira_univjijel@yahoo.fr.	organophosphate (chlorpyrifos)		Biomedicine & pharmacotherapy = Biomedecine & pharmacotherapie	Biomed Pharmacother
29304407	The effect of chlorpyrifos on salinity acclimation of juvenile rainbow trout (Oncorhynchus mykiss).	Amiri, BM; Xu, EG; Kupsco, A; Giroux, M; Hoseinzadeh, M; Schlenk, D	2018	N	Not thyroid endpoints	Department of Fisheries & Environmental Sciences, Faculty of Natural Resources, University of Tehran, 31585-4314 Karaj, Iran; Department of Environmental Sciences, University of California, Riverside, CA 92521, USA.	organophosphate (chlorpyrifos)		Aquatic toxicology (Amsterdam, Netherlands)	Aquat Toxicol
26239436	Molecular and biochemical evidences on the protective effects of triiodothyronine against phosphine-induced cardiac and mitochondrial toxicity	Abdolghaffari, AH; Baghaei, A; Solgi, R; Gooshe, M; Baeeri, M; Navaei-Nigjeh, M; Hassani, S; Jafari, A; Rezayat, SM; Dehpour, AR; Mehr, SE; Abdollahi, M	2015	N	Protective effect	Department of Pharmacology, School of Medicine, International Campus, Tehran University of Medical Sciences (TUMS-IC), 1417653861 Tehran, Iran; Pharmacology and Applied Medicine, Department of Medicinal Plants Research Center, Institute of Medicinal Plants, ACECR, 141554364 Karaj, Iran; Department of Pharmacology, School of Medicine, Tehran University of Medical Sciences, 1417614411 Tehran, Iran;…	phosphines		Life sciences	Life Sci
28599194	Spatiotemporal patterns and relationships among the diet, biochemistry, and exposure to flame retardants in an apex avian predator, the peregrine falcon.	Fernie, KJ; Chabot, D; Champoux, L; Brimble, S; Alaee, M; Marteinson, S; Chen, D; Palace, V; Bird, DM; Letcher, RJ	2017	N	Flame retardant	Ecotoxicology & Wildlife Health Division, Science & Technology Branch, Environment and Climate Change Canada, Burlington, Ontario, Canada. Electronic address: kim.fernie@canada.ca.	polybrominated / organophosphate esters		Environmental research	Environ Res
26446907	The ameliorating effects of vitamin E on hepatic antioxidant system and xenobiotic-metabolizing enzymes in fenvalerate-exposed iodine-deficient rats.	Kocer-Gumusel, B; Erkekoglu, P; Caglayan, A; Hincal, F	2016	N	Protective effect	a Department of Toxicology , Faculty of Pharmacy, Hacettepe University , Ankara , Turkey.	pyrethroids		Drug and chemical toxicology	Drug Chem Toxicol
30553212	Developmental toxicity of kresoxim-methyl during zebrafish (Danio rerio) larval development.	Jiang, J; Lv, L; Wu, S; An, X; Wang, F; Liu, X; Zhao, X	2019	N	High doses	Institute of Quality and Standard for Agro-products, Zhejiang Academy of Agricultural Sciences, State Key Laboratory Breeding Base for Zhejiang Sustainable Pest and Disease Control, Hangzhou, 310021, Zhejiang, China.	strobilurin		Chemosphere	Chemosphere
29733884	Probabilistic dietary risk assessment of triazole and dithiocarbamate fungicides for the Brazilian population.	Jardim, ANO; Mello, DC; Brito, AP; van der Voet, H; Boon, PE; Caldas, ED	2018	N	No health effect	Laboratory of Toxicology, Department of Pharmaceutical Sciences, University of Brasilia, Brasilia, DF, Brazil.	triazole and dithiocarbamate		Food and chemical toxicology : an international journal published for the British Industrial Biological Research Association	Food Chem Toxicol
25246753	Extremely elevated international normalized ratio of warfarin in a patient with CYP2C9*1/*3 and thyrotoxicosis.	Lee, JE; Ryu, DH; Jeong, HJ; Kim, JH; Jun, JE; Kim, JS; Lee, SY	2014	N	Thyrotoxicosis	Department of Medicine, Samsung Medical Center, Sungkyunkwan University School of Medicine, Seoul, Korea.	warfarin		Journal of Korean medical science	J Korean Med Sci
24991217	Graves' disease and treatment effects on warfarin anticoagulation.	Howard-Thompson, A; Luckey, A; George, C; Choby, BA; Self, TH	2014	N	Off-target	Department of Clinical Pharmacy and Family Medicine, University of Tennessee Health Science Center, 881 Madison Avenue, Memphis, TN 38163, USA.	warfarin		Case reports in medicine	Case Rep Med
